# Supplementary material for: Diversified strategy for the synthesis of DNA-encoded oxindole libraries
Source: Royal Society of Chemistry journal article supplement (doi:10.1039/d0sc06696f), 2021-01-01
Supplement: d0sc06696f2.xlsx [file d0sc06696f2.xlsx]

## Sheet: Plate1-12
			Smiles	CAS
Cycle1	ctcagcttaAG	taagctgagCA	C#CC[C@@H](NC(OCC1C2=CC=CC=C2C3=CC=CC=C31)=O)CC(O)=O	332064-94-5
Cycle1	cttaggctgAG	cagcctaagCA	FC=1C=CC(=CC1)C[C@H](CC(O)=O)NC(OCC2C3=CC=CC=C3C4=CC=CC=C42)=O	331763-70-3
Cycle1	aagcggcttAG	aagccgcttCA	N#CC=1C=CC(=CC1)C[C@@H](CC(O)=O)NC(OCC2C3=CC=CC=C3C4=CC=CC=C42)=O	270065-90-2
Cycle1	cacacagacAG	gtctgtgtgCA	FC1=C(F)C(F)=C(F)C(F)=C1C[C@@H](CC(O)=O)NC(OCC2C3=CC=CC=C3C4=CC=CC=C42)=O	270063-43-9
Cycle1	cacggcaatAG	attgccgtgCA	C#CC[C@H](NC(OCC1C2=CC=CC=C2C3=CC=CC=C31)=O)CC(O)=O	1217669-02-7
Cycle1	cgtccttcaAG	tgaaggacgCA	FC1=C(F)C(F)=C(F)C(F)=C1C[C@H](CC(O)=O)NC(OCC2C3=CC=CC=C3C4=CC=CC=C42)=O	269398-94-9
Cycle1	ttcaacgccAG	ggcgttgaaCA	O=C(O)[C@H]1C[C@H](C=C1)NC(OCC2C3=CC=CC=C3C4=CC=CC=C42)=O	220497-64-3
Cycle1	gtcgagttcAG	gaactcgacCA	ClC1=CC2=C(C=C1)C(C[C@H](C(O)=O)NC(OCC3C4=CC=CC=C4C5=CC=CC=C53)=O)=CN2	925916-73-0
Cycle1	tttcgcggaAG	tccgcgaaaCA	N#CC=1C=CC(=CC1)C[C@H](CC(O)=O)NC(OCC2C3=CC=CC=C3C4=CC=CC=C42)=O	269726-87-6
Cycle1	tgaccctaaAG	ttagggtcaCA	O=C(O)[C@@H](NC(OCC1C2=CC=CC=C2C3=CC=CC=C31)=O)CCC4CCCCC4	269078-73-1
Cycle1	aaggcatagAG	ctatgccttCA	C1=CC=C2CN([C@@H](CC2=C1)C(=O)O)C(=O)OCC3C4=CC=CC=C4C5=CC=CC=C53	136030-33-6
Cycle1	cagccatagAG	ctatggctgCA	ClC=1C=CC(=CC1)C[C@H](C(O)=O)NC(OCC2C3=CC=CC=C3C4=CC=CC=C42)=O	142994-19-2
Cycle1	gaacgcagtAG	actgcgttcCA	N#CC=1C=CC(=CC1)C[C@H](C(O)=O)NC(OCC2C3=CC=CC=C3C4=CC=CC=C42)=O	205526-34-7
Cycle1	ccaaacttgAG	caagtttggCA	C1=CC=C2C(=C1)C3=CC=CC=C3C2COC(=O)N4CCCC[C@@H]4C(=O)O	101555-63-9
Cycle1	agcatgaacAG	gttcatgctCA	O=C(O)[C@H](NC(OCC1C2=CC=CC=C2C3=CC=CC=C31)=O)C4CCCCC4	198543-96-3
Cycle1	cctatggcaAG	tgccataggCA	O=C(O)[C@H](NC(OCC1C2=CC=CC=C2C3=CC=CC=C31)=O)CCC4CCCCC4	269078-72-0
Cycle1	gtagctcttAG	aagagctacCA	O=C([C@@H]1C[C@H](NC(OCC2C3=C(C4=C2C=CC=C4)C=CC=C3)=O)CC1)O	220497-66-5
Cycle1	ttgtgtagcAG	gctacacaaCA	C1=CC=C2C(=C1)C3=CC=CC=C3C2COC(=O)N4CC(C4)C(=O)O	193693-64-0
Cycle1	tgcatgcacAG	gtgcatgcaCA	C1=CC=C2C(=C1)C3=CC=CC=C3C2COC(=O)N4CCC[C@H]4C(=O)N5CCC[C@H]5C(=O)O	129223-22-9
Cycle1	ggtcttacaAG	tgtaagaccCA	O=C(O)[C@H](CC1=CSC=C1)NC(OCC2C3=CC=CC=C3C4=CC=CC=C42)=O	186320-06-9
Cycle1	catcgtagtAG	actacgatgCA	ClC1=CC2=C(C=C1)C(C[C@@H](C(O)=O)NC(OCC3C4=CC=CC=C4C5=CC=CC=C53)=O)=CN2	908847-42-7
Cycle1	gtaagatcgAG	cgatcttacCA	O=C(O)[C@H](CC1=CSC=N1)NC(OCC2C3=CC=CC=C3C4=CC=CC=C42)=O	205528-32-1
Cycle1	caccaacacAG	gtgttggtgCA	CN([C@@H](CC1CCCCC1)C(=O)O)C(=O)OCC2C3=CC=CC=C3C4=CC=CC=C42	148983-03-3
Cycle1	ggttaggagAG	ctcctaaccCA	O=C(O)[C@H](CC1=CC=CO1)NC(OCC2C3=CC=CC=C3C4=CC=CC=C42)=O	159611-02-6
Cycle1	tgcttggatAG	atccaagcaCA	O=C(O)[C@H](NC(OCC1C2=CC=CC=C2C3=CC=CC=C31)=O)CC=4C=CC(=CC4)C5=CC=CC=C5	205526-38-1
Cycle1	aagcagagtAG	actctgcttCA	O=C(O)C1CCC(CC1)CNC(OCC2C3=CC=CC=C3C4=CC=CC=C42)=O	188715-40-4
Cycle1	cagacgaatAG	attcgtctgCA	C=CCC(C(O)=O)(NC(OCC1C2=CC=CC=C2C3=CC=CC=C31)=O)CC=C	1311992-97-8
Cycle1	ctatctaccAG	ggtagatagCA	O=C(O)C[C@H](C1=CC([N+]([O-])=O)=CC=C1)NC(OCC2C3=CC=CC=C3C4=CC=CC=C42)=O	374791-04-5
Cycle1	tggctttccAG	ggaaagccaCA	NC(NCCC[C@H](C(O)=O)NC(OCC1C2=CC=CC=C2C3=CC=CC=C31)=O)=O	200344-33-8
Cycle1	gaagcaaagAG	ctttgcttcCA	O=C(O)C[C@H](C1=CC=C(Br)C=C1)NC(OCC2C3=CC=CC=C3C4=CC=CC=C42)=O	220498-04-4
Cycle1	acagtactcAG	gagtactgtCA	CC1=CC=CC=C1[C@H](NC(OCC2C3=CC=CC=C3C4=CC=CC=C42)=O)CC(O)=O	507472-27-7
Cycle1	ctatactggAG	ccagtatagCA	O=C(O)C[C@H](C1=CC=C(C(F)(F)F)C=C1)NC(OCC2C3=CC=CC=C3C4=CC=CC=C42)=O	517905-88-3
Cycle1	ccaagagctAG	agctcttggCA	O=C(O)CC(C1=CC=C(Br)C=C1)NC(OCC2C3=CC=CC=C3C4=CC=CC=C42)=O	269078-76-4
Cycle1	taagtccctAG	agggacttaCA	CC1=CC=C(C(NC(OCC2C3=CC=CC=C3C4=CC=CC=C42)=O)CC(O)=O)C=C1	284492-08-6
Cycle1	cccaaggatAG	atccttgggCA	C1=CC=C(C=C1)C[C@@H](C(=O)N2CCC[C@H]2C(=O)O)NC(=O)OCC3C4=C(C=CC=C4)C5=C3C=CC=C5	138372-76-6
Cycle1	agaggaagaAG	tcttcctctCA	C=CCC(NC(OCC1C2=CC=CC=C2C3=CC=CC=C31)=O)C(O)=O	221884-63-5
Cycle1	ggagcatttAG	aaatgctccCA	C1CCC2C(C1)C[C@H](C(=O)O)N2C(=O)OCC3C4=CC=CC=C4C5=CC=CC=C53	1217512-55-4
Cycle1	tcggatcacAG	gtgatccgaCA	O=C(O)C[C@@H](CC1=CC=CS1)NC(OCC2C3=CC=CC=C3C4=CC=CC=C42)=O	270262-98-1
Cycle1	aggtctggtAG	accagacctCA	C=CC[C@@H](NC(OCC1C2=CC=CC=C2C3=CC=CC=C31)=O)C(O)=O	170642-28-1
Cycle1	cgttctgtaAG	tacagaacgCA	C#CCCC[C@@H](C(=O)O)NC(=O)OCC1C2=C(C=CC=C2)C3=C1C=CC=C3	1097192-05-6
Cycle1	gaatggggaAG	tccccattcCA	FC1=C(F)C(F)=C(F)C(F)=C1C[C@@H](C(O)=O)NC(OCC2C3=CC=CC=C3C4=CC=CC=C42)=O	205526-32-5
Cycle1	gatcgccttAG	aaggcgatcCA	CC1=CC=C(C[C@H](NC(OCC2C3=CC=CC=C3C4=CC=CC=C42)=O)C(O)=O)C=C1	199006-54-7
Cycle1	tacctcttgAG	caagaggtaCA	CC1=C(C(C)=CC(O)=C1)C[C@H](NC(OCC2C3=CC=CC=C3C4=CC=CC=C42)=O)C(O)=O	206060-54-0
Cycle1	gagtcacgtAG	acgtgactcCA	O=C(O)[C@H](CC1=CSC2=CC=CC=C12)NC(OCC3C4=CC=CC=C4C5=CC=CC=C53)=O	177966-60-8
Cycle1	ttgtcggaaAG	ttccgacaaCA	O=C([C@H]1N(C(OCC2C3=C(C4=C2C=CC=C4)C=CC=C3)=O)[C@@]5([H])CCCC[C@@]5([H])C1)O	130309-37-4
Cycle1	acaggtaacAG	gttacctgtCA	O=C(O)C1=CC=CC(CNC(OCC2C3=CC=CC=C3C4=CC=CC=C42)=O)=C1	155369-11-2
Cycle1	tttaagccgAG	cggcttaaaCA	FC1=CC(C[C@H](C(O)=O)NC(OCC2C3=CC=CC=C3C4=CC=CC=C42)=O)=CC(F)=C1F	205526-31-4
Cycle1	aagtcgtacAG	gtacgacttCA	ClC=1C=CC(=CC1Cl)C[C@@H](C(O)=O)NC(OCC2C3=CC=CC=C3C4=CC=CC=C42)=O	177966-59-5
Cycle1	aaaagcgtcAG	gacgcttttCA	C1=CC=C2C(=C1)C3=CC=CC=C3C2COC(=O)N4CCC(C4)C(=O)O	885951-89-3
Cycle1	agtcatggtAG	accatgactCA	IC=1C=CC(=CC1)C[C@@H](C(O)=O)NC(OCC2C3=CC=CC=C3C4=CC=CC=C42)=O	82565-68-2
Cycle1	cagttcaagAG	cttgaactgCA	IC=1C=CC(=CC1)C[C@H](C(O)=O)NC(OCC2C3=CC=CC=C3C4=CC=CC=C42)=O	205526-29-0
Cycle1	cagagtgatAG	atcactctgCA	C1=CC=C2C(=C1)C[C@@H](C(=O)O)N2C(=O)OCC3C4=CC=CC=C4C5=CC=CC=C53	198560-38-2
Cycle1	gttggtgttAG	aacaccaacCA	O=[N+]([O-])C=1C=CC(=C(C1)[N+]([O-])=O)NC[C@@H](C(O)=O)NC(OCC2C3=CC=CC=C3C4=CC=CC=C42)=O	140430-54-2
Cycle1	cgattccgtAG	acggaatcgCA	O=C(O)[C@@H](CC1=CSC2=CC=CC=C12)NC(OCC3C4=CC=CC=C4C5=CC=CC=C53)=O	177966-61-9
Cycle1	cgctaaatcAG	gatttagcgCA	O=C(O)[C@H](CC1CC1)NC(OCC2C3=CC=CC=C3C4=CC=CC=C42)=O	214750-76-2
Cycle1	actgtgcatAG	atgcacagtCA	O=C(O)C[C@H](CC1=CC=CO1)NC(OCC2C3=CC=CC=C3C4=CC=CC=C42)=O	270263-07-5
Cycle1	catagcacgAG	cgtgctatgCA	O=C(O)C1(NC(OCC2C3=CC=CC=C3C4=CC=CC=C42)=O)CCCCC1	162648-54-6
Cycle1	gtgctgatgAG	catcagcacCA	FC1=CC2=C(C=C1)C(CC(C(O)=O)NC(OCC3C4=CC=CC=C4C5=CC=CC=C53)=O)=CN2	1219392-55-8
Cycle1	gggcctttaAG	taaaggcccCA	ClC=1C=CC(=CC1Cl)C[C@H](C(O)=O)NC(OCC2C3=CC=CC=C3C4=CC=CC=C42)=O	177966-58-4
Cycle1	cagtctggaAG	tccagactgCA	BrC=1C=CC(=CC1)C[C@@H](C(O)=O)NC(OCC2C3=CC=CC=C3C4=CC=CC=C42)=O	198561-04-5
Cycle1	ctgttgactAG	agtcaacagCA	O=[N+]([O-])C=1C=CC(=CC1)C[C@H](C(O)=O)NC(OCC2C3=CC=CC=C3C4=CC=CC=C42)=O	177966-63-1
Cycle1	gaccaatccAG	ggattggtcCA	O=C(O)C[C@@H](NC(OCC1C2=CC=CC=C2C3=CC=CC=C31)=O)C/C=C/C4=CC=CC=C4	1217460-65-5
Cycle1	cgcttacatAG	atgtaagcgCA	O=C(O)[C@@H](CC1=CN=CC=C1)NC(OCC2C3=CC=CC=C3C4=CC=CC=C42)=O	142994-45-4
Cycle1	ccgtttacaAG	tgtaaacggCA	O=C(O)[C@@H](NC(OCC1C2=CC=CC=C2C3=CC=CC=C31)=O)C4CCCC4	220497-61-0
Cycle1	gtaacacgcAG	gcgtgttacCA	O=C(O)C=1C=CC(=CC1)CNC(OCC2C3=CC=CC=C3C4=CC=CC=C42)=O	164470-64-8
Cycle1	cttctggtaAG	taccagaagCA	O=C(O)C1(CCCC1)NC(OCC2C3=CC=CC=C3C4=CC=CC=C42)=O	117322-30-2
Cycle1	accagttacAG	gtaactggtCA	O=C(O)C1(CCC1)NC(OCC2C3=CC=CC=C3C4=CC=CC=C42)=O	885951-77-9
Cycle1	agacaccagAG	ctggtgtctCA	FC(F)(F)C=1C=CC(=CC1)C[C@@H](C(O)=O)NC(OCC2C3=CC=CC=C3C4=CC=CC=C42)=O	247113-86-6
Cycle1	cgaatgagtAG	actcattcgCA	C1=CC=C2C(=C1)C3=CC=CC=C3C2COC(=O)N4CC5=CC(=CC=C5C[C@H]4C(=O)O)O	178432-49-0
Cycle1	tgaacgtctAG	agacgttcaCA	COC1=C(OC)C=C(C[C@H](NC(OCC2C3=CC=CC=C3C4=CC=CC=C42)=O)C(O)=O)C=C1	184962-88-7
Cycle1	cggaacatcAG	gatgttccgCA	O=C(O)[C@H](CC1=CC=CS1)NC(OCC2C3=CC=CC=C3C4=CC=CC=C42)=O	130309-35-2
Cycle1	agcagatgcAG	gcatctgctCA	OC=1C=CC2=C(C1)C(=CN2)C[C@@H](C(O)=O)NC(OCC3C4=CC=CC=C4C5=CC=CC=C53)=O	178119-94-3
Cycle1	gctctcgaaAG	ttcgagagcCA	O=C(O)[C@H]1CCC[C@@H]1NC(OCC2C3=CC=CC=C3C4=CC=CC=C42)=O	359586-64-4
Cycle1	aggaacctcAG	gaggttcctCA	O=C(O)C[C@H](CC1=CSC=C1)NC(OCC2C3=CC=CC=C3C4=CC=CC=C42)=O	270263-01-9
Cycle1	gccctaactAG	agttagggcCA	O=C(O)C1(CCOCC1)NC(OCC2C3=CC=CC=C3C4=CC=CC=C42)=O	285996-72-7
Cycle1	acctcagacAG	gtctgaggtCA	O=C(O)[C@H](C1=CSC=C1)NC(OCC2C3=CC=CC=C3C4=CC=CC=C42)=O	1217706-09-6
Cycle1	acccgattgAG	caatcgggtCA	O=C(O)C1(CC1)NC(OCC2C3=CC=CC=C3C4=CC=CC=C42)=O	126705-22-4
Cycle1	tatgactccAG	ggagtcataCA	C1=CC=C2C(=C1)C3=CC=CC=C3C2COC(=O)NC4=CC=C(C=C4)C(=O)O	185116-43-2
Cycle1	catgaggtgAG	cacctcatgCA	C#CC[C@@H](NC(OCC1C2=CC=CC=C2C3=CC=CC=C31)=O)C(O)=O	220497-98-3
Cycle1	cccagtatgAG	catactgggCA	C#CC[C@H](NC(OCC1C2=CC=CC=C2C3=CC=CC=C31)=O)C(O)=O	198561-07-8
Cycle1	gagttttccAG	ggaaaactcCA	ClC=1C=CC(=C(C1)Cl)C[C@@H](C(O)=O)NC(OCC2C3=CC=CC=C3C4=CC=CC=C42)=O	352351-62-3
Cycle1	gggcttagtAG	actaagcccCA	FC1=CC(C[C@@H](C(O)=O)NC(OCC2C3=CC=CC=C3C4=CC=CC=C42)=O)=CC(F)=C1F	205526-30-3
Cycle1	cttcccgtaAG	tacgggaagCA	O=C(O)[C@H](CC1=CN=CC=C1)NC(OCC2C3=CC=CC=C3C4=CC=CC=C42)=O	175453-07-3
Cycle1	tttgagcgtAG	acgctcaaaCA	O=C(O)[C@H](NC(OCC1C2=CC=CC=C2C3=CC=CC=C31)=O)C4CCCC4	136555-16-3
Cycle1	tgctctcgaAG	tcgagagcaCA	O=C(O)[C@@H](NC(OCC1C2=CC=CC=C2C3=CC=CC=C31)=O)CCCNC(OCC4=CC=CC=C4)=O	138775-07-2
Cycle1	cgcatgcatAG	atgcatgcgCA	FC(F)(F)C(NCCCC[C@@H](C(O)=O)NC(OCC1C2=CC=CC=C2C3=CC=CC=C31)=O)=O	76265-69-5
Cycle1	cactgcgttAG	aacgcagtgCA	O=C(CC[C@H](NC(OCC1C2=CC=CC=C2C3=CC=CC=C31)=O)C(O)=O)OC4CCCCC4	150047-85-1
Cycle1	gtttagtggAG	ccactaaacCA	[N-]=[N+]=NCCC[C@@H](C(O)=O)NC(OCC1C2=CC=CC=C2C3=CC=CC=C31)=O	1097192-04-5
Cycle1	accggcttaAG	taagccggtCA	C#CC[C@](C(O)=O)(NC(OCC1C2=CC=CC=C2C3=CC=CC=C31)=O)C	1198791-65-9
Cycle1	ctaacaaccAG	ggttgttagCA	C[C@@H](OCC1=CC=CC=C1)[C@H](NC(OCC2C3=CC=CC=C3C4=CC=CC=C42)=O)C(O)=O	117872-75-0
Cycle1	gtcaacgttAG	aacgttgacCA	O=C(O)C[C@H](C1=CC=C([N+]([O-])=O)C=C1)NC(OCC2C3=CC=CC=C3C4=CC=CC=C42)=O	507472-26-6
Cycle1	ctccgttgtAG	acaacggagCA	COC1=CC(OC)=CC([C@H](NC(OCC2C3=CC=CC=C3C4=CC=CC=C42)=O)CC(O)=O)=C1	511272-41-6
Cycle1	agttaaggcAG	gccttaactCA	O=C(O)C[C@H](C1=CN=CC=C1)NC(OCC2C3=CC=CC=C3C4=CC=CC=C42)=O	511272-43-8
Cycle1	gaaacgtcgAG	cgacgtttcCA	O=C(O)C[C@H](C1=CC=CS1)NC(OCC2C3=CC=CC=C3C4=CC=CC=C42)=O	511272-45-0
Cycle1	ggtacagtaAG	tactgtaccCA	O=C(O)C[C@H](C1=CC=CO1)NC(OCC2C3=CC=CC=C3C4=CC=CC=C42)=O	1217662-55-9
Cycle1	tcacagcatAG	atgctgtgaCA	CC(C1=CC=C(C[C@H](NC(OCC2C3=CC=CC=C3C4=CC=CC=C42)=O)C(O)=O)C=C1)=O	204716-07-4
Cycle1	tacgactgtAG	acagtcgtaCA	O=C(O)C1=CC(NC(OCC2C3=CC=CC=C3C4=CC=CC=C42)=O)=C(N)C=C1	1071446-05-3
Cycle1	gatcagggtAG	accctgatcCA	C1(C2=C(C=CC=C2)C3=C1C=CC=C3)COC(N[C@H](C(=O)O)C4=CC=C(C=C4)OC)=O	1260596-73-3
Cycle1	aaagcggttAG	aaccgctttCA	O=C(O)[C@H](CC1=CNC2=C1C=CC=N2)NC(OCC3C4=CC=CC=C4C5=CC=CC=C53)=O	737007-45-3
Cycle1	caacacagtAG	actgtgttgCA	N1([C@H](C(=O)O)C[C@H](C1)F)C(=O)OCC1c2c(cccc2)c2c1cccc2	1228307-81-0
Cycle1	gagatacgtAG	acgtatctcCA	FC1=CC(C[C@H](C(O)=O)NC(OCC2C3=CC=CC=C3C4=CC=CC=C42)=O)=CC(F)=C1	205526-25-6
Cycle1	aaagtggggAG	ccccactttCA	FC=1C=CC(=C(C1)F)C[C@@H](C(O)=O)NC(OCC2C3=CC=CC=C3C4=CC=CC=C42)=O	1032337-49-7
Cycle1	gaccgaaatAG	atttcggtcCA	C1=CC=C2C(=C1)C3=CC=CC=C3C2COC(=O)N4CSC[C@H]4C(=O)O	133054-21-4
Cycle1	acgatgcaaAG	ttgcatcgtCA	C1(C2=C(C=CC=C2)C3=C1C=CC=C3)COC(N([C@H](C(=O)O)CC4=CC=C(C=C4)Cl)C)=O	1217716-50-1
Cycle1	tggtgttctAG	agaacaccaCA	O=C(O)C1(NC(OCC2C3=CC=CC=C3C4=CC=CC=C42)=O)CC5=CC=CC=C5C1	135944-07-9
Cycle1	aagcttcctAG	aggaagcttCA	O=C(O)[C@H](CC1CCC1)NC(OCC2C3=CC=CC=C3C4=CC=CC=C42)=O	478183-62-9
Cycle1	cgttgtgtcAG	gacacaacgCA	O=C(O)[C@@H]1CCC[C@H]1NC(OCC2C3=CC=CC=C3C4=CC=CC=C42)=O	359586-69-9
Cycle1	ggcgatattAG	aatatcgccCA	O=C(O)CC1(NC(OCC2C3=CC=CC=C3C4=CC=CC=C42)=O)CCCCC1	282524-98-5
Cycle1	ttaggaggtAG	acctcctaaCA	O=C(O)CC1(CNC(OCC2C3=CC=CC=C3C4=CC=CC=C42)=O)CCCCC1	882847-19-0
Cycle1	catatccacAG	gtggatatgCA	O=C(O)[C@@H]1CC[C@H](CC1)CNC(OCC2C3=CC=CC=C3C4=CC=CC=C42)=O	167690-53-1
Cycle1	cgcagtagtAG	actactgcgCA	O=[N+]([O-])C=1C=CC(=CC1)C[C@@H](C(O)=O)NC(OCC2C3=CC=CC=C3C4=CC=CC=C42)=O	95753-55-2
Cycle1	aacatcctgAG	caggatgttCA	C1=CC=C2C(=C1)C3=CC=CC=C3C2COC(=O)N4CCCC[C@H]4C(=O)O	86069-86-5
Cycle1	tagcaccagAG	ctggtgctaCA	O=C(O)[C@@H]1CC[C@H](CC1)NC(OCC2C3=CC=CC=C3C4=CC=CC=C42)=O	147900-46-7
Cycle1	gcatttcggAG	ccgaaatgcCA	CC1(OCC2=C(O1)C=CC(C[C@H](NC(OCC3C4=CC=CC=C4C5=CC=CC=C53)=O)C(O)=O)=C2)C	252049-13-1
Cycle1	gaactaggtAG	acctagttcCA	IC=1C=CC(=CC1)C[C@H](CC(O)=O)NC(OCC2C3=CC=CC=C3C4=CC=CC=C42)=O	269396-73-8
Cycle1	gtgcatgacAG	gtcatgcacCA	BrC=1C=CC(=CC1)C[C@@H](CC(O)=O)NC(OCC2C3=CC=CC=C3C4=CC=CC=C42)=O	270062-86-7
Cycle1	gtcgatggaAG	tccatcgacCA	ClC=1C=CC(=CC1Cl)C[C@@H](CC(O)=O)NC(OCC2C3=CC=CC=C3C4=CC=CC=C42)=O	270063-52-0
Cycle1	acaatagcgAG	cgctattgtCA	IC=1C=CC(=CC1)C[C@@H](CC(O)=O)NC(OCC2C3=CC=CC=C3C4=CC=CC=C42)=O	270065-72-0
Cycle1	aaagctgcgAG	cgcagctttCA	O=C(O)C[C@H](CC1=CNC2=CC=CC=C12)NC(OCC3C4=CC=CC=C4C5=CC=CC=C53)=O	353245-98-4
Cycle1	atgagactcAG	gagtctcatCA	O=C(O)C[C@@H](C1=CC=C(F)C=C1)NC(OCC2C3=CC=CC=C3C4=CC=CC=C42)=O	479064-89-6
Cycle1	gagcagacaAG	tgtctgctcCA	O=C(O)C[C@@H](C1=C(Cl)C(Cl)=CC=C1)NC(OCC2C3=CC=CC=C3C4=CC=CC=C42)=O	501015-35-6
Cycle1	gaaaatgggAG	cccattttcCA	O=C(O)C[C@H](C1=C(Cl)C=C(Cl)C=C1)NC(OCC2C3=CC=CC=C3C4=CC=CC=C42)=O	511272-37-0
Cycle1	aagcgacaaAG	ttgtcgcttCA	O=C(O)[C@@H](NC(OCC1C2=CC=CC=C2C3=CC=CC=C31)=O)C4CCCCC4	161321-36-4
Cycle1	cacttggtaAG	taccaagtgCA	O=C(O)[C@@H](NC(OCC1C2=CC=CC=C2C3=CC=CC=C31)=O)CC4=CC=CC=C4F	205526-26-7
Cycle1	aaagtccgcAG	gcggactttCA	FC=1C=CC(=CC1F)C[C@H](C(O)=O)NC(OCC2C3=CC=CC=C3C4=CC=CC=C42)=O	198545-59-4
Cycle1	ttacctggaAG	tccaggtaaCA	FC=1C=CC(=CC1)C[C@@H](C(O)=O)NC(OCC2C3=CC=CC=C3C4=CC=CC=C42)=O	169243-86-1
Cycle1	tgaacacgtAG	acgtgttcaCA	C1=CC=C2CN([C@H](CC2=C1)C(=O)O)C(=O)OCC3C4=CC=CC=C4C5=CC=CC=C53	130309-33-0
Cycle1	cgaacacaaAG	ttgtgttcgCA	O=C(O)[C@H](NC(OCC1C2=CC=CC=C2C3=CC=CC=C31)=O)CC4=CC=CC=C4Cl	205526-22-3
Cycle1	cttggacgaAG	tcgtccaagCA	N#CC=1C=CC(=CC1)C[C@@H](C(O)=O)NC(OCC2C3=CC=CC=C3C4=CC=CC=C42)=O	173963-93-4
Cycle1	ctgtttctgAG	cagaaacagCA	CC(C)(OC(N1CCCC(C1)CC(NC(OCC2C3=CC=CC=C3C4=CC=CC=C42)=O)C(O)=O)=O)C	457060-97-8
Cycle1	gaggcacatAG	atgtgcctcCA	C[C@]1(CCCN1C(=O)OCC2C3=CC=CC=C3C4=CC=CC=C42)C(=O)O	167275-47-0
Cycle1	acaattgcgAG	cgcaattgtCA	C(F)(C1=CC=C(C[C@@H](C(O)=O)NC(=O)OCC2C3=C(C4=C2C=CC=C4)C=CC=C3)C=C1)F	1808268-08-7
Cycle1	gtatccgatAG	atcggatacCA	C1CN(C[C@@H](C(=O)O)NC(OCC2C3=C(C4=C2C=CC=C4)C=CC=C3)=O)CCO1	1251903-85-1
Cycle1	ggtttgtacAG	gtacaaaccCA	C1=CC=C2C(=C1)C3=CC=CC=C3C2COC(=O)N4CCC[C@@H]4CC(=O)O	193693-61-7
Cycle1	tatccccttAG	aaggggataCA	C1=CC=C2C(=C1)C3=CC=CC=C3C2COC(=O)N4CC[C@@H]4C(=O)O	374791-02-3
Cycle1	caggtctcaAG	tgagacctgCA	O=C(O)C1(NC(OCC2C3=CC=CC=C3C4=CC=CC=C42)=O)CCC5=CC=CC=C51	214139-28-3
Cycle1	gtcttcaagAG	cttgaagacCA	C1=CC=C2C(=C1)CN(C2C(=O)O)C(=O)OCC3C4=CC=CC=C4C5=CC=CC=C53	204320-59-2
Cycle1	agcagtcagAG	ctgactgctCA	O=C(O)[C@@H](NC(OCC1C2=CC=CC=C2C3=CC=CC=C31)=O)C/C=C/C4=CC=CC=C4	159610-82-9
Cycle1	gtgtctccaAG	tggagacacCA	C1CC[C@H]2[C@@H](C1)C[C@@H](C(=O)O)N2C(=O)OCC3C4=CC=CC=C4C5=CC=CC=C53	214750-71-7
Cycle1	accctactaAG	tagtagggtCA	CC(C)(C)OC(=O)N1CCN(C1C(=O)O)C(=O)OCC2C3=CC=CC=C3C4=CC=CC=C42	207129-12-2
Cycle1	gtcgggattAG	aatcccgacCA	C1(C2=C(C=CC=C2)C3=C1C=CC=C3)COC(NCC(C(=O)O)C4=CC=C(C=C4)Cl)=O	683217-64-3
Cycle1	cgctgtgatAG	atcacagcgCA	FC=1C=CC(=CC1F)C[C@@H](C(O)=O)NC(OCC2C3=CC=CC=C3C4=CC=CC=C42)=O	198560-43-9
Cycle1	gtttctgtcAG	gacagaaacCA	CC1=CC=CC=C1C[C@H](NC(OCC2C3=CC=CC=C3C4=CC=CC=C42)=O)C(O)=O	211637-75-1
Cycle1	ttggcctctAG	agaggccaaCA	FC(F)(F)C=1C=CC(=CC1)C[C@H](C(O)=O)NC(OCC2C3=CC=CC=C3C4=CC=CC=C42)=O	238742-88-6
Cycle1	gcgcaagaaAG	ttcttgcgcCA	C1=CC=C2C(=C1)C3=CC=CC=C3C2COC(=O)N4C[C@H](C[C@@H]4C(=O)O)O	139262-20-7
Cycle1	ggtagctaaAG	ttagctaccCA	O=C(O)[C@H]1C[C@H](CC1)NC(OCC2C3=CC=CC=C3C4=CC=CC=C42)=O	220497-67-6
Cycle1	agatcagcaAG	tgctgatctCA	CC(C)(OC(N1C[C@@H](C(O)=O)[C@H](NC(OCC2C3=CC=CC=C3C4=CC=CC=C42)=O)C1)=O)C	267230-44-4
Cycle1	caatctggaAG	tccagattgCA	C1=CC=C2C(=C1)C3=CC=CC=C3C2COC(=O)N4CCC[C@@H]4COCC(=O)O	1335206-44-4
Cycle1	aggcaatgcAG	gcattgcctCA	C=CCC[C@@H](NC(OCC1C2=CC=CC=C2C3=CC=CC=C31)=O)C(O)=O	865352-21-2
Cycle1	ttgggtaacAG	gttacccaaCA	C1=CC=C2C(=C1)C3=CC=CC=C3C2COC(=O)N4CCOC[C@@H]4C(=O)O	942153-03-9
Cycle1	cggtccttaAG	taaggaccgCA	O=C(O)[C@H](C1CC1)NC(OCC2C3=CC=CC=C3C4=CC=CC=C42)=O	1212257-18-5
Cycle1	gctaagtgcAG	gcacttagcCA	CC(C)(OC(N1CCC(C(NC(OCC2C3=CC=CC=C3C4=CC=CC=C42)=O)C(O)=O)CC1)=O)C	313051-96-6
Cycle1	aggggtgatAG	atcacccctCA	CC(C)(OC(N1CCCC(C(NC(OCC2C3=CC=CC=C3C4=CC=CC=C42)=O)CC(O)=O)C1)=O)C	372144-11-1
Cycle1	tggacctgaAG	tcaggtccaCA	O=C(O)C[C@@H](C1=CC=C(C#N)C=C1)NC(OCC2C3=CC=CC=C3C4=CC=CC=C42)=O	507472-24-4
Cycle1	catacatcgAG	cgatgtatgCA	CN1C=C(C2=CC=CC=C21)C[C@@H](NC(OCC3C4=CC=CC=C4C5=CC=CC=C53)=O)C(O)=O	168471-22-5
Cycle1	tcaacccctAG	aggggttgaCA	FC(F)(F)C=1C=CC(=CC1)C[C@@H](CC(O)=O)NC(OCC2C3=CC=CC=C3C4=CC=CC=C42)=O	270065-81-1
Cycle1	tttctctcgAG	cgagagaaaCA	FC1=CC=CC(C[C@H](CC(O)=O)NC(OCC2C3=CC=CC=C3C4=CC=CC=C42)=O)=C1	331763-67-8
Cycle1	actgtctacAG	gtagacagtCA	N#CC1=CC=CC(C[C@H](CC(O)=O)NC(OCC2C3=CC=CC=C3C4=CC=CC=C42)=O)=C1	269726-84-3
Cycle1	tggggctttAG	aaagccccaCA	O=C(O)C[C@H](NC(OCC1C2=CC=CC=C2C3=CC=CC=C31)=O)CC4=CC=CC=C4Cl	268734-29-8
Cycle1	tcgcctagaAG	tctaggcgaCA	C1=CC=C2C(=C1)C3=CC=CC=C3C2COC(=O)N4CCC[C@H]4CC(=O)O	193693-60-6
Cycle1	cacaatcggAG	ccgattgtgCA	C1=CC=C2CN([C@H](CC2=C1)CC(=O)O)C(=O)OCC3C4=CC=CC=C4C5=CC=CC=C53	332064-67-2
Cycle1	gtcggacaaAG	ttgtccgacCA	ClC=1C=CC(=CC1)C[C@H](CC(O)=O)NC(OCC2C3=CC=CC=C3C4=CC=CC=C42)=O	331763-60-1
Cycle1	gcgactgatAG	atcagtcgcCA	ClC=1C=CC(=C(C1)Cl)C[C@@H](CC(O)=O)NC(OCC2C3=CC=CC=C3C4=CC=CC=C42)=O	270063-49-5
Cycle1	cctccagttAG	aactggaggCA	ClC=1C=CC(=C(C1)Cl)C[C@H](CC(O)=O)NC(OCC2C3=CC=CC=C3C4=CC=CC=C42)=O	269396-54-5
Cycle1	cagaacactAG	agtgttctgCA	FC=1C=CC(=CC1)C[C@@H](CC(O)=O)NC(OCC2C3=CC=CC=C3C4=CC=CC=C42)=O	270062-83-4
Cycle1	tcataggcgAG	cgcctatgaCA	O=C(O)C[C@H](CC1=CC=CS1)NC(OCC2C3=CC=CC=C3C4=CC=CC=C42)=O	269726-90-1
Cycle1	tgcgagcatAG	atgctcgcaCA	O=C(O)C[C@H](CC1=CSC2=CC=CC=C12)NC(OCC3C4=CC=CC=C4C5=CC=CC=C53)=O	270063-46-2
Cycle1	accccaaaaAG	ttttggggtCA	BrC=1C=CC(=CC1)C[C@H](CC(O)=O)NC(OCC2C3=CC=CC=C3C4=CC=CC=C42)=O	331763-76-9
Cycle1	ggccatatgAG	catatggccCA	ClC=1C=CC(=CC1)C[C@@H](CC(O)=O)NC(OCC2C3=CC=CC=C3C4=CC=CC=C42)=O	270596-43-5
Cycle1	ggagcgtttAG	aaacgctccCA	ClC=1C=CC(=CC1Cl)C[C@H](CC(O)=O)NC(OCC2C3=CC=CC=C3C4=CC=CC=C42)=O	269396-57-8
Cycle1	catgttgacAG	gtcaacatgCA	FC(F)(F)C=1C=CC(=CC1)C[C@H](CC(O)=O)NC(OCC2C3=CC=CC=C3C4=CC=CC=C42)=O	269726-78-5
Cycle1	gctcacacaAG	tgtgtgagcCA	O=C(O)C[C@H](C1=CC=C(Cl)C=C1)NC(OCC2C3=CC=CC=C3C4=CC=CC=C42)=O	479064-92-1
Cycle1	aggccgattAG	aatcggcctCA	O=C(O)C[C@H](C1=CC(Cl)=CC=C1)NC(OCC2C3=CC=CC=C3C4=CC=CC=C42)=O	511272-53-0
Cycle1	cgcgtttagAG	ctaaacgcgCA	C1CCC(C1)C[C@H](C(=O)O)NC(=O)OCC2C3=C(C=CC=C3)C4=C2C=CC=C4	1262802-59-4
Cycle1	tacatgaggAG	cctcatgtaCA	C=CC[C@H](NC(OCC1C2=CC=CC=C2C3=CC=CC=C31)=O)C(O)=O	146549-21-5
Cycle1	ggttattccAG	ggaataaccCA	O=[N+]([O-])C=1C=CC(=CC1)C[C@H](CC(O)=O)NC(OCC2C3=CC=CC=C3C4=CC=CC=C42)=O	269398-78-9
Cycle1	atgcgaaccAG	ggttcgcatCA	O=[N+]([O-])C=1C=CC(=CC1)C[C@@H](CC(O)=O)NC(OCC2C3=CC=CC=C3C4=CC=CC=C42)=O	270062-88-9
Cycle1	acctgttcgAG	cgaacaggtCA	CC(=O)NCSC[C@@H](C(=O)O)NC(=O)OCC1C2=CC=CC=C2C3=CC=CC=C13	86060-81-3
Cycle1	ggctttgaaAG	ttcaaagccCA	CC(C)(C)OC(=O)NCCCC[C@@H](C(=O)O)NC(=O)OCC1C2=CC=CC=C2C3=CC=CC=C13	71989-26-9
Cycle1	taaacgaccAG	ggtcgtttaCA	C1C[C@H](N(C1)C(=O)OCC2C3=CC=CC=C3C4=CC=CC=C24)C(=O)O	71989-31-6
Cycle1	cctgaaagcAG	gctttcaggCA	CC(C(C(=O)O)NC(=O)OCC1C2=CC=CC=C2C3=CC=CC=C13)OC(C)(C)C	71989-35-0
Cycle1	tgggattgcAG	gcaatcccaCA	CSCCC(C(=O)O)NC(=O)OCC1C2=CC=CC=C2C3=CC=CC=C13	71989-28-1
Cycle1	cttgcatgaAG	tcatgcaagCA	CC(C)(C)OCC(C(=O)O)NC(=O)OCC1C2=CC=CC=C2C3=CC=CC=C13	128107-47-1
Cycle1	gaagcctcaAG	tgaggcttcCA	CC(C)C(C(=O)O)NC(=O)OCC1C2=CC=CC=C2C3=CC=CC=C13	68858-20-8
Cycle1	actcccaacAG	gttgggagtCA	CC(C)CC(C(=O)O)NC(=O)OCC1C2=CC=CC=C2C3=CC=CC=C13	35661-60-0
Cycle1	tgtgctaccAG	ggtagcacaCA	C1=CC=C(C=C1)CC(C(=O)O)NC(=O)OCC2C3=CC=CC=C3C4=CC=CC=C24	35661-40-6
Cycle1	ccgtcctatAG	ataggacggCA	CC(C(=O)O)NC(=O)OCC1C2=CC=CC=C2C3=CC=CC=C13	35661-39-3
Cycle1	actcctgcaAG	tgcaggagtCA	CC(C)(C)OC(=O)CCC(C(=O)O)NC(=O)OCC1C2=CC=CC=C2C3=CC=CC=C13	71989-18-9
Cycle1	tatctggccAG	ggccagataCA	CC(C)(C)OC(=O)CC(C(=O)O)NC(=O)OCC1C2=CC=CC=C2C3=CC=CC=C13	71989-14-5
Cycle1	atgcgctgaAG	tcagcgcatCA	C1=CC=C2C(=C1)C(C3=CC=CC=C32)COC(=O)NCC(=O)O	29022-11-5
Cycle1	ctagtctacAG	gtagactagCA	CCC(C)C(C(=O)O)NC(=O)OCC1C2=CC=CC=C2C3=CC=CC=C13	71989-23-6
Cycle1	cataccgatAG	atcggtatgCA	COC(=O)CC(C(=O)O)NC(=O)OCC1C2=CC=CC=C2C3=CC=CC=C13	145038-53-5
Cycle1	tgacgtgcaAG	tgcacgtcaCA	CC(C)(C)OCC(C(=O)O)NC(=O)OCC1C2=CC=CC=C2C3=CC=CC=C13	71989-33-8
Cycle1	ccactggatAG	atccagtggCA	CC(C(=O)O)NC(=O)OCC1C2=CC=CC=C2C3=CC=CC=C13	79990-15-1
Cycle1	catctatccAG	ggatagatgCA	CC(C)CC(C(=O)O)NC(=O)OCC1C2=CC=CC=C2C3=CC=CC=C13	114360-54-2
Cycle1	caagccgtaAG	tacggcttgCA	CSCCC(C(=O)O)NC(=O)OCC1C2=CC=CC=C2C3=CC=CC=C13	112883-40-6
Cycle1	gcttagtcaAG	tgactaagcCA	C1=CC=C(C=C1)CC(C(=O)O)NC(=O)OCC2C3=CC=CC=C3C4=CC=CC=C24	86123-10-6
Cycle1	gtgtggatcAG	gatccacacCA	CCCCC(C(=O)O)NC(=O)OCC1C2=CC=CC=C2C3=CC=CC=C13	112883-41-7
Cycle1	gtcactggaAG	tccagtgacCA	CC(C)(C)OC(=O)CCC(C(=O)O)NC(=O)OCC1C2=CC=CC=C2C3=CC=CC=C13	104091-08-9
Cycle1	cataccacgAG	cgtggtatgCA	CC(C)C(C(=O)O)NC(=O)OCC1C2=CC=CC=C2C3=CC=CC=C13	84624-17-9
Cycle1	ctcactaacAG	gttagtgagCA	CC(C(C(=O)O)NC(=O)OCC1C2=CC=CC=C2C3=CC=CC=C13)OC(C)(C)C	138797-71-4
Cycle1	gttatacggAG	ccgtataacCA	CC(C)(C)OC1=CC=C(C=C1)CC(C(=O)O)NC(=O)OCC2C3=CC=CC=C3C4=CC=CC=C24	118488-18-9
Cycle1	acagagtagAG	ctactctgtCA	C1CC(N(C1)C(=O)OCC2C3=CC=CC=C3C4=CC=CC=C24)C(=O)O	101555-62-8
Cycle1	gtatgcagtAG	actgcatacCA	C1=CC=C(C=C1)CCC(C(=O)O)NC(=O)OCC2C3=CC=CC=C3C4=CC=CC=C24	135994-09-1
Cycle1	cacaatgccAG	ggcattgtgCA	C1=CC=C2C(=C1)C(C3=CC=CC=C32)COC(=O)NCCC(=O)O	35737-10-1
Cycle1	gccatgtgtAG	acacatggcCA	C1CCC(CC1)CC(C(=O)O)NC(=O)OCC2C3=CC=CC=C3C4=CC=CC=C24	135673-97-1
Cycle1	gagacggatAG	atccgtctcCA	C	C
Cycle2	gatgccagtGT	actggcatcCT	C1C[C@@H](C(=O)O)NC1	147-85-3	C1=CC2=C(C=C1I)C(=O)C(=O)N2		20780-76-1
Cycle2	atcattccgGT	cggaatgatCT	C1[C@@H](C(=O)O)NCS1	34592-47-7	C1=CC2=C(C=C1I)C(=O)C(=O)N2		20780-76-1
Cycle2	tgcgttgttGT	aacaacgcaCT	C1[C@H](CN[C@@H]1C(=O)O)O	51-35-4	C1=CC2=C(C=C1I)C(=O)C(=O)N2		20780-76-1
Cycle3	gcctttcgtGA	acgaaaggcAC	C=CC1=CC=CC=C1	100-42-5
Cycle3	aacgatccaGA	tggatcgttAC	C=CC1=CC=C(C=C1)F	405-99-2
Cycle3	actcctaccGA	ggtaggagtAC	C=CC1=CC=C(C=C1)Br	2039-82-9
Cycle3	aacgtaagcGA	gcttacgttAC	C=CC1=CC=C(C=C1)Cl	1073-67-2
Cycle3	tcatatccgGA	cggatatgaAC	C=CC1=CC=C(C=C1)C#N	3435-51-6
Cycle3	acataccgaGA	tcggtatgtAC	C=CC1=CC=C(C=C1)C(=O)OC	1076-96-6
Cycle3	agcaaggttGA	aaccttgctAC	C=CC1=CC=C(C)C=C1	622-97-9
Cycle3	ccaagctatGA	atagcttggAC	C=CC1=CC=C(C=C1)OC	637-69-4
Cycle3	tatcctaccGA	ggtaggataAC	C=CC1=CC=C(C=C1)O	2628-17-3
Cycle3	gccaaaactGA	agttttggcAC	C=CC1=CC=C(C=C1)N	1520-21-4
Cycle3	ttgtccgtgGA	cacggacaaAC	C=CC1=CC=NC=C1	100-43-6
Cycle3	cgtaggttaGA	taacctacgAC	C	C
