# Supplementary material for: Diversified strategy for the synthesis of DNA-encoded oxindole libraries
Source: Royal Society of Chemistry journal article supplement (doi:10.1039/d0sc06696f), 2021-01-01
Supplement: d0sc06696f4.xlsx [file d0sc06696f4.xlsx]

## Sheet: Plate1-12
			Smiles	CAS
Cycle1	ctcagcttaAG	taagctgagCA	C#CC[C@@H](NC(OCC1C2=CC=CC=C2C3=CC=CC=C31)=O)CC(O)=O	332064-94-5
Cycle1	cttaggctgAG	cagcctaagCA	FC=1C=CC(=CC1)C[C@H](CC(O)=O)NC(OCC2C3=CC=CC=C3C4=CC=CC=C42)=O	331763-70-3
Cycle1	aagcggcttAG	aagccgcttCA	N#CC=1C=CC(=CC1)C[C@@H](CC(O)=O)NC(OCC2C3=CC=CC=C3C4=CC=CC=C42)=O	270065-90-2
Cycle1	cacacagacAG	gtctgtgtgCA	FC1=C(F)C(F)=C(F)C(F)=C1C[C@@H](CC(O)=O)NC(OCC2C3=CC=CC=C3C4=CC=CC=C42)=O	270063-43-9
Cycle1	cacggcaatAG	attgccgtgCA	C#CC[C@H](NC(OCC1C2=CC=CC=C2C3=CC=CC=C31)=O)CC(O)=O	1217669-02-7
Cycle1	cgtccttcaAG	tgaaggacgCA	FC1=C(F)C(F)=C(F)C(F)=C1C[C@H](CC(O)=O)NC(OCC2C3=CC=CC=C3C4=CC=CC=C42)=O	269398-94-9
Cycle1	ttcaacgccAG	ggcgttgaaCA	O=C(O)[C@H]1C[C@H](C=C1)NC(OCC2C3=CC=CC=C3C4=CC=CC=C42)=O	220497-64-3
Cycle1	gtcgagttcAG	gaactcgacCA	ClC1=CC2=C(C=C1)C(C[C@H](C(O)=O)NC(OCC3C4=CC=CC=C4C5=CC=CC=C53)=O)=CN2	925916-73-0
Cycle1	tttcgcggaAG	tccgcgaaaCA	N#CC=1C=CC(=CC1)C[C@H](CC(O)=O)NC(OCC2C3=CC=CC=C3C4=CC=CC=C42)=O	269726-87-6
Cycle1	tgaccctaaAG	ttagggtcaCA	O=C(O)[C@@H](NC(OCC1C2=CC=CC=C2C3=CC=CC=C31)=O)CCC4CCCCC4	269078-73-1
Cycle1	aaggcatagAG	ctatgccttCA	C1=CC=C2CN([C@@H](CC2=C1)C(=O)O)C(=O)OCC3C4=CC=CC=C4C5=CC=CC=C53	136030-33-6
Cycle1	cagccatagAG	ctatggctgCA	ClC=1C=CC(=CC1)C[C@H](C(O)=O)NC(OCC2C3=CC=CC=C3C4=CC=CC=C42)=O	142994-19-2
Cycle1	gaacgcagtAG	actgcgttcCA	N#CC=1C=CC(=CC1)C[C@H](C(O)=O)NC(OCC2C3=CC=CC=C3C4=CC=CC=C42)=O	205526-34-7
Cycle1	ccaaacttgAG	caagtttggCA	C1=CC=C2C(=C1)C3=CC=CC=C3C2COC(=O)N4CCCC[C@@H]4C(=O)O	101555-63-9
Cycle1	agcatgaacAG	gttcatgctCA	O=C(O)[C@H](NC(OCC1C2=CC=CC=C2C3=CC=CC=C31)=O)C4CCCCC4	198543-96-3
Cycle1	cctatggcaAG	tgccataggCA	O=C(O)[C@H](NC(OCC1C2=CC=CC=C2C3=CC=CC=C31)=O)CCC4CCCCC4	269078-72-0
Cycle1	gtagctcttAG	aagagctacCA	O=C([C@@H]1C[C@H](NC(OCC2C3=C(C4=C2C=CC=C4)C=CC=C3)=O)CC1)O	220497-66-5
Cycle1	ttgtgtagcAG	gctacacaaCA	C1=CC=C2C(=C1)C3=CC=CC=C3C2COC(=O)N4CC(C4)C(=O)O	193693-64-0
Cycle1	tgcatgcacAG	gtgcatgcaCA	C1=CC=C2C(=C1)C3=CC=CC=C3C2COC(=O)N4CCC[C@H]4C(=O)N5CCC[C@H]5C(=O)O	129223-22-9
Cycle1	ggtcttacaAG	tgtaagaccCA	O=C(O)[C@H](CC1=CSC=C1)NC(OCC2C3=CC=CC=C3C4=CC=CC=C42)=O	186320-06-9
Cycle1	catcgtagtAG	actacgatgCA	ClC1=CC2=C(C=C1)C(C[C@@H](C(O)=O)NC(OCC3C4=CC=CC=C4C5=CC=CC=C53)=O)=CN2	908847-42-7
Cycle1	gtaagatcgAG	cgatcttacCA	O=C(O)[C@H](CC1=CSC=N1)NC(OCC2C3=CC=CC=C3C4=CC=CC=C42)=O	205528-32-1
Cycle1	caccaacacAG	gtgttggtgCA	CN([C@@H](CC1CCCCC1)C(=O)O)C(=O)OCC2C3=CC=CC=C3C4=CC=CC=C42	148983-03-3
Cycle1	ggttaggagAG	ctcctaaccCA	O=C(O)[C@H](CC1=CC=CO1)NC(OCC2C3=CC=CC=C3C4=CC=CC=C42)=O	159611-02-6
Cycle1	tgcttggatAG	atccaagcaCA	O=C(O)[C@H](NC(OCC1C2=CC=CC=C2C3=CC=CC=C31)=O)CC=4C=CC(=CC4)C5=CC=CC=C5	205526-38-1
Cycle1	aagcagagtAG	actctgcttCA	O=C(O)C1CCC(CC1)CNC(OCC2C3=CC=CC=C3C4=CC=CC=C42)=O	188715-40-4
Cycle1	cagacgaatAG	attcgtctgCA	C=CCC(C(O)=O)(NC(OCC1C2=CC=CC=C2C3=CC=CC=C31)=O)CC=C	1311992-97-8
Cycle1	ctatctaccAG	ggtagatagCA	O=C(O)C[C@H](C1=CC([N+]([O-])=O)=CC=C1)NC(OCC2C3=CC=CC=C3C4=CC=CC=C42)=O	374791-04-5
Cycle1	tggctttccAG	ggaaagccaCA	NC(NCCC[C@H](C(O)=O)NC(OCC1C2=CC=CC=C2C3=CC=CC=C31)=O)=O	200344-33-8
Cycle1	gaagcaaagAG	ctttgcttcCA	O=C(O)C[C@H](C1=CC=C(Br)C=C1)NC(OCC2C3=CC=CC=C3C4=CC=CC=C42)=O	220498-04-4
Cycle1	acagtactcAG	gagtactgtCA	CC1=CC=CC=C1[C@H](NC(OCC2C3=CC=CC=C3C4=CC=CC=C42)=O)CC(O)=O	507472-27-7
Cycle1	ctatactggAG	ccagtatagCA	O=C(O)C[C@H](C1=CC=C(C(F)(F)F)C=C1)NC(OCC2C3=CC=CC=C3C4=CC=CC=C42)=O	517905-88-3
Cycle1	ccaagagctAG	agctcttggCA	O=C(O)CC(C1=CC=C(Br)C=C1)NC(OCC2C3=CC=CC=C3C4=CC=CC=C42)=O	269078-76-4
Cycle1	taagtccctAG	agggacttaCA	CC1=CC=C(C(NC(OCC2C3=CC=CC=C3C4=CC=CC=C42)=O)CC(O)=O)C=C1	284492-08-6
Cycle1	cccaaggatAG	atccttgggCA	C1=CC=C(C=C1)C[C@@H](C(=O)N2CCC[C@H]2C(=O)O)NC(=O)OCC3C4=C(C=CC=C4)C5=C3C=CC=C5	138372-76-6
Cycle1	agaggaagaAG	tcttcctctCA	C=CCC(NC(OCC1C2=CC=CC=C2C3=CC=CC=C31)=O)C(O)=O	221884-63-5
Cycle1	ggagcatttAG	aaatgctccCA	C1CCC2C(C1)C[C@H](C(=O)O)N2C(=O)OCC3C4=CC=CC=C4C5=CC=CC=C53	1217512-55-4
Cycle1	tcggatcacAG	gtgatccgaCA	O=C(O)C[C@@H](CC1=CC=CS1)NC(OCC2C3=CC=CC=C3C4=CC=CC=C42)=O	270262-98-1
Cycle1	aggtctggtAG	accagacctCA	C=CC[C@@H](NC(OCC1C2=CC=CC=C2C3=CC=CC=C31)=O)C(O)=O	170642-28-1
Cycle1	cgttctgtaAG	tacagaacgCA	C#CCCC[C@@H](C(=O)O)NC(=O)OCC1C2=C(C=CC=C2)C3=C1C=CC=C3	1097192-05-6
Cycle1	gaatggggaAG	tccccattcCA	FC1=C(F)C(F)=C(F)C(F)=C1C[C@@H](C(O)=O)NC(OCC2C3=CC=CC=C3C4=CC=CC=C42)=O	205526-32-5
Cycle1	gatcgccttAG	aaggcgatcCA	CC1=CC=C(C[C@H](NC(OCC2C3=CC=CC=C3C4=CC=CC=C42)=O)C(O)=O)C=C1	199006-54-7
Cycle1	tacctcttgAG	caagaggtaCA	CC1=C(C(C)=CC(O)=C1)C[C@H](NC(OCC2C3=CC=CC=C3C4=CC=CC=C42)=O)C(O)=O	206060-54-0
Cycle1	gagtcacgtAG	acgtgactcCA	O=C(O)[C@H](CC1=CSC2=CC=CC=C12)NC(OCC3C4=CC=CC=C4C5=CC=CC=C53)=O	177966-60-8
Cycle1	ttgtcggaaAG	ttccgacaaCA	O=C([C@H]1N(C(OCC2C3=C(C4=C2C=CC=C4)C=CC=C3)=O)[C@@]5([H])CCCC[C@@]5([H])C1)O	130309-37-4
Cycle1	acaggtaacAG	gttacctgtCA	O=C(O)C1=CC=CC(CNC(OCC2C3=CC=CC=C3C4=CC=CC=C42)=O)=C1	155369-11-2
Cycle1	tttaagccgAG	cggcttaaaCA	FC1=CC(C[C@H](C(O)=O)NC(OCC2C3=CC=CC=C3C4=CC=CC=C42)=O)=CC(F)=C1F	205526-31-4
Cycle1	aagtcgtacAG	gtacgacttCA	ClC=1C=CC(=CC1Cl)C[C@@H](C(O)=O)NC(OCC2C3=CC=CC=C3C4=CC=CC=C42)=O	177966-59-5
Cycle1	aaaagcgtcAG	gacgcttttCA	C1=CC=C2C(=C1)C3=CC=CC=C3C2COC(=O)N4CCC(C4)C(=O)O	885951-89-3
Cycle1	agtcatggtAG	accatgactCA	IC=1C=CC(=CC1)C[C@@H](C(O)=O)NC(OCC2C3=CC=CC=C3C4=CC=CC=C42)=O	82565-68-2
Cycle1	cagttcaagAG	cttgaactgCA	IC=1C=CC(=CC1)C[C@H](C(O)=O)NC(OCC2C3=CC=CC=C3C4=CC=CC=C42)=O	205526-29-0
Cycle1	cagagtgatAG	atcactctgCA	C1=CC=C2C(=C1)C[C@@H](C(=O)O)N2C(=O)OCC3C4=CC=CC=C4C5=CC=CC=C53	198560-38-2
Cycle1	gttggtgttAG	aacaccaacCA	O=[N+]([O-])C=1C=CC(=C(C1)[N+]([O-])=O)NC[C@@H](C(O)=O)NC(OCC2C3=CC=CC=C3C4=CC=CC=C42)=O	140430-54-2
Cycle1	cgattccgtAG	acggaatcgCA	O=C(O)[C@@H](CC1=CSC2=CC=CC=C12)NC(OCC3C4=CC=CC=C4C5=CC=CC=C53)=O	177966-61-9
Cycle1	cgctaaatcAG	gatttagcgCA	O=C(O)[C@H](CC1CC1)NC(OCC2C3=CC=CC=C3C4=CC=CC=C42)=O	214750-76-2
Cycle1	actgtgcatAG	atgcacagtCA	O=C(O)C[C@H](CC1=CC=CO1)NC(OCC2C3=CC=CC=C3C4=CC=CC=C42)=O	270263-07-5
Cycle1	catagcacgAG	cgtgctatgCA	O=C(O)C1(NC(OCC2C3=CC=CC=C3C4=CC=CC=C42)=O)CCCCC1	162648-54-6
Cycle1	gtgctgatgAG	catcagcacCA	FC1=CC2=C(C=C1)C(CC(C(O)=O)NC(OCC3C4=CC=CC=C4C5=CC=CC=C53)=O)=CN2	1219392-55-8
Cycle1	gggcctttaAG	taaaggcccCA	ClC=1C=CC(=CC1Cl)C[C@H](C(O)=O)NC(OCC2C3=CC=CC=C3C4=CC=CC=C42)=O	177966-58-4
Cycle1	cagtctggaAG	tccagactgCA	BrC=1C=CC(=CC1)C[C@@H](C(O)=O)NC(OCC2C3=CC=CC=C3C4=CC=CC=C42)=O	198561-04-5
Cycle1	ctgttgactAG	agtcaacagCA	O=[N+]([O-])C=1C=CC(=CC1)C[C@H](C(O)=O)NC(OCC2C3=CC=CC=C3C4=CC=CC=C42)=O	177966-63-1
Cycle1	gaccaatccAG	ggattggtcCA	O=C(O)C[C@@H](NC(OCC1C2=CC=CC=C2C3=CC=CC=C31)=O)C/C=C/C4=CC=CC=C4	1217460-65-5
Cycle1	cgcttacatAG	atgtaagcgCA	O=C(O)[C@@H](CC1=CN=CC=C1)NC(OCC2C3=CC=CC=C3C4=CC=CC=C42)=O	142994-45-4
Cycle1	ccgtttacaAG	tgtaaacggCA	O=C(O)[C@@H](NC(OCC1C2=CC=CC=C2C3=CC=CC=C31)=O)C4CCCC4	220497-61-0
Cycle1	gtaacacgcAG	gcgtgttacCA	O=C(O)C=1C=CC(=CC1)CNC(OCC2C3=CC=CC=C3C4=CC=CC=C42)=O	164470-64-8
Cycle1	cttctggtaAG	taccagaagCA	O=C(O)C1(CCCC1)NC(OCC2C3=CC=CC=C3C4=CC=CC=C42)=O	117322-30-2
Cycle1	accagttacAG	gtaactggtCA	O=C(O)C1(CCC1)NC(OCC2C3=CC=CC=C3C4=CC=CC=C42)=O	885951-77-9
Cycle1	agacaccagAG	ctggtgtctCA	FC(F)(F)C=1C=CC(=CC1)C[C@@H](C(O)=O)NC(OCC2C3=CC=CC=C3C4=CC=CC=C42)=O	247113-86-6
Cycle1	cgaatgagtAG	actcattcgCA	C1=CC=C2C(=C1)C3=CC=CC=C3C2COC(=O)N4CC5=CC(=CC=C5C[C@H]4C(=O)O)O	178432-49-0
Cycle1	tgaacgtctAG	agacgttcaCA	COC1=C(OC)C=C(C[C@H](NC(OCC2C3=CC=CC=C3C4=CC=CC=C42)=O)C(O)=O)C=C1	184962-88-7
Cycle1	cggaacatcAG	gatgttccgCA	O=C(O)[C@H](CC1=CC=CS1)NC(OCC2C3=CC=CC=C3C4=CC=CC=C42)=O	130309-35-2
Cycle1	agcagatgcAG	gcatctgctCA	OC=1C=CC2=C(C1)C(=CN2)C[C@@H](C(O)=O)NC(OCC3C4=CC=CC=C4C5=CC=CC=C53)=O	178119-94-3
Cycle1	gctctcgaaAG	ttcgagagcCA	O=C(O)[C@H]1CCC[C@@H]1NC(OCC2C3=CC=CC=C3C4=CC=CC=C42)=O	359586-64-4
Cycle1	aggaacctcAG	gaggttcctCA	O=C(O)C[C@H](CC1=CSC=C1)NC(OCC2C3=CC=CC=C3C4=CC=CC=C42)=O	270263-01-9
Cycle1	gccctaactAG	agttagggcCA	O=C(O)C1(CCOCC1)NC(OCC2C3=CC=CC=C3C4=CC=CC=C42)=O	285996-72-7
Cycle1	acctcagacAG	gtctgaggtCA	O=C(O)[C@H](C1=CSC=C1)NC(OCC2C3=CC=CC=C3C4=CC=CC=C42)=O	1217706-09-6
Cycle1	acccgattgAG	caatcgggtCA	O=C(O)C1(CC1)NC(OCC2C3=CC=CC=C3C4=CC=CC=C42)=O	126705-22-4
Cycle1	tatgactccAG	ggagtcataCA	C1=CC=C2C(=C1)C3=CC=CC=C3C2COC(=O)NC4=CC=C(C=C4)C(=O)O	185116-43-2
Cycle1	catgaggtgAG	cacctcatgCA	C#CC[C@@H](NC(OCC1C2=CC=CC=C2C3=CC=CC=C31)=O)C(O)=O	220497-98-3
Cycle1	cccagtatgAG	catactgggCA	C#CC[C@H](NC(OCC1C2=CC=CC=C2C3=CC=CC=C31)=O)C(O)=O	198561-07-8
Cycle1	gagttttccAG	ggaaaactcCA	ClC=1C=CC(=C(C1)Cl)C[C@@H](C(O)=O)NC(OCC2C3=CC=CC=C3C4=CC=CC=C42)=O	352351-62-3
Cycle1	gggcttagtAG	actaagcccCA	FC1=CC(C[C@@H](C(O)=O)NC(OCC2C3=CC=CC=C3C4=CC=CC=C42)=O)=CC(F)=C1F	205526-30-3
Cycle1	cttcccgtaAG	tacgggaagCA	O=C(O)[C@H](CC1=CN=CC=C1)NC(OCC2C3=CC=CC=C3C4=CC=CC=C42)=O	175453-07-3
Cycle1	tttgagcgtAG	acgctcaaaCA	O=C(O)[C@H](NC(OCC1C2=CC=CC=C2C3=CC=CC=C31)=O)C4CCCC4	136555-16-3
Cycle1	tgctctcgaAG	tcgagagcaCA	O=C(O)[C@@H](NC(OCC1C2=CC=CC=C2C3=CC=CC=C31)=O)CCCNC(OCC4=CC=CC=C4)=O	138775-07-2
Cycle1	cgcatgcatAG	atgcatgcgCA	FC(F)(F)C(NCCCC[C@@H](C(O)=O)NC(OCC1C2=CC=CC=C2C3=CC=CC=C31)=O)=O	76265-69-5
Cycle1	cactgcgttAG	aacgcagtgCA	O=C(CC[C@H](NC(OCC1C2=CC=CC=C2C3=CC=CC=C31)=O)C(O)=O)OC4CCCCC4	150047-85-1
Cycle1	gtttagtggAG	ccactaaacCA	[N-]=[N+]=NCCC[C@@H](C(O)=O)NC(OCC1C2=CC=CC=C2C3=CC=CC=C31)=O	1097192-04-5
Cycle1	accggcttaAG	taagccggtCA	C#CC[C@](C(O)=O)(NC(OCC1C2=CC=CC=C2C3=CC=CC=C31)=O)C	1198791-65-9
Cycle1	ctaacaaccAG	ggttgttagCA	C[C@@H](OCC1=CC=CC=C1)[C@H](NC(OCC2C3=CC=CC=C3C4=CC=CC=C42)=O)C(O)=O	117872-75-0
Cycle1	gtcaacgttAG	aacgttgacCA	O=C(O)C[C@H](C1=CC=C([N+]([O-])=O)C=C1)NC(OCC2C3=CC=CC=C3C4=CC=CC=C42)=O	507472-26-6
Cycle1	ctccgttgtAG	acaacggagCA	COC1=CC(OC)=CC([C@H](NC(OCC2C3=CC=CC=C3C4=CC=CC=C42)=O)CC(O)=O)=C1	511272-41-6
Cycle1	agttaaggcAG	gccttaactCA	O=C(O)C[C@H](C1=CN=CC=C1)NC(OCC2C3=CC=CC=C3C4=CC=CC=C42)=O	511272-43-8
Cycle1	gaaacgtcgAG	cgacgtttcCA	O=C(O)C[C@H](C1=CC=CS1)NC(OCC2C3=CC=CC=C3C4=CC=CC=C42)=O	511272-45-0
Cycle1	ggtacagtaAG	tactgtaccCA	O=C(O)C[C@H](C1=CC=CO1)NC(OCC2C3=CC=CC=C3C4=CC=CC=C42)=O	1217662-55-9
Cycle1	tcacagcatAG	atgctgtgaCA	CC(C1=CC=C(C[C@H](NC(OCC2C3=CC=CC=C3C4=CC=CC=C42)=O)C(O)=O)C=C1)=O	204716-07-4
Cycle1	tacgactgtAG	acagtcgtaCA	O=C(O)C1=CC(NC(OCC2C3=CC=CC=C3C4=CC=CC=C42)=O)=C(N)C=C1	1071446-05-3
Cycle1	gatcagggtAG	accctgatcCA	C1(C2=C(C=CC=C2)C3=C1C=CC=C3)COC(N[C@H](C(=O)O)C4=CC=C(C=C4)OC)=O	1260596-73-3
Cycle1	aaagcggttAG	aaccgctttCA	O=C(O)[C@H](CC1=CNC2=C1C=CC=N2)NC(OCC3C4=CC=CC=C4C5=CC=CC=C53)=O	737007-45-3
Cycle1	caacacagtAG	actgtgttgCA	N1([C@H](C(=O)O)C[C@H](C1)F)C(=O)OCC1c2c(cccc2)c2c1cccc2	1228307-81-0
Cycle1	gagatacgtAG	acgtatctcCA	FC1=CC(C[C@H](C(O)=O)NC(OCC2C3=CC=CC=C3C4=CC=CC=C42)=O)=CC(F)=C1	205526-25-6
Cycle1	aaagtggggAG	ccccactttCA	FC=1C=CC(=C(C1)F)C[C@@H](C(O)=O)NC(OCC2C3=CC=CC=C3C4=CC=CC=C42)=O	1032337-49-7
Cycle1	gaccgaaatAG	atttcggtcCA	C1=CC=C2C(=C1)C3=CC=CC=C3C2COC(=O)N4CSC[C@H]4C(=O)O	133054-21-4
Cycle1	acgatgcaaAG	ttgcatcgtCA	C1(C2=C(C=CC=C2)C3=C1C=CC=C3)COC(N([C@H](C(=O)O)CC4=CC=C(C=C4)Cl)C)=O	1217716-50-1
Cycle1	tggtgttctAG	agaacaccaCA	O=C(O)C1(NC(OCC2C3=CC=CC=C3C4=CC=CC=C42)=O)CC5=CC=CC=C5C1	135944-07-9
Cycle1	aagcttcctAG	aggaagcttCA	O=C(O)[C@H](CC1CCC1)NC(OCC2C3=CC=CC=C3C4=CC=CC=C42)=O	478183-62-9
Cycle1	cgttgtgtcAG	gacacaacgCA	O=C(O)[C@@H]1CCC[C@H]1NC(OCC2C3=CC=CC=C3C4=CC=CC=C42)=O	359586-69-9
Cycle1	ggcgatattAG	aatatcgccCA	O=C(O)CC1(NC(OCC2C3=CC=CC=C3C4=CC=CC=C42)=O)CCCCC1	282524-98-5
Cycle1	ttaggaggtAG	acctcctaaCA	O=C(O)CC1(CNC(OCC2C3=CC=CC=C3C4=CC=CC=C42)=O)CCCCC1	882847-19-0
Cycle1	catatccacAG	gtggatatgCA	O=C(O)[C@@H]1CC[C@H](CC1)CNC(OCC2C3=CC=CC=C3C4=CC=CC=C42)=O	167690-53-1
Cycle1	cgcagtagtAG	actactgcgCA	O=[N+]([O-])C=1C=CC(=CC1)C[C@@H](C(O)=O)NC(OCC2C3=CC=CC=C3C4=CC=CC=C42)=O	95753-55-2
Cycle1	aacatcctgAG	caggatgttCA	C1=CC=C2C(=C1)C3=CC=CC=C3C2COC(=O)N4CCCC[C@H]4C(=O)O	86069-86-5
Cycle1	tagcaccagAG	ctggtgctaCA	O=C(O)[C@@H]1CC[C@H](CC1)NC(OCC2C3=CC=CC=C3C4=CC=CC=C42)=O	147900-46-7
Cycle1	gcatttcggAG	ccgaaatgcCA	CC1(OCC2=C(O1)C=CC(C[C@H](NC(OCC3C4=CC=CC=C4C5=CC=CC=C53)=O)C(O)=O)=C2)C	252049-13-1
Cycle1	gaactaggtAG	acctagttcCA	IC=1C=CC(=CC1)C[C@H](CC(O)=O)NC(OCC2C3=CC=CC=C3C4=CC=CC=C42)=O	269396-73-8
Cycle1	gtgcatgacAG	gtcatgcacCA	BrC=1C=CC(=CC1)C[C@@H](CC(O)=O)NC(OCC2C3=CC=CC=C3C4=CC=CC=C42)=O	270062-86-7
Cycle1	gtcgatggaAG	tccatcgacCA	ClC=1C=CC(=CC1Cl)C[C@@H](CC(O)=O)NC(OCC2C3=CC=CC=C3C4=CC=CC=C42)=O	270063-52-0
Cycle1	acaatagcgAG	cgctattgtCA	IC=1C=CC(=CC1)C[C@@H](CC(O)=O)NC(OCC2C3=CC=CC=C3C4=CC=CC=C42)=O	270065-72-0
Cycle1	aaagctgcgAG	cgcagctttCA	O=C(O)C[C@H](CC1=CNC2=CC=CC=C12)NC(OCC3C4=CC=CC=C4C5=CC=CC=C53)=O	353245-98-4
Cycle1	atgagactcAG	gagtctcatCA	O=C(O)C[C@@H](C1=CC=C(F)C=C1)NC(OCC2C3=CC=CC=C3C4=CC=CC=C42)=O	479064-89-6
Cycle1	gagcagacaAG	tgtctgctcCA	O=C(O)C[C@@H](C1=C(Cl)C(Cl)=CC=C1)NC(OCC2C3=CC=CC=C3C4=CC=CC=C42)=O	501015-35-6
Cycle1	gaaaatgggAG	cccattttcCA	O=C(O)C[C@H](C1=C(Cl)C=C(Cl)C=C1)NC(OCC2C3=CC=CC=C3C4=CC=CC=C42)=O	511272-37-0
Cycle1	aagcgacaaAG	ttgtcgcttCA	O=C(O)[C@@H](NC(OCC1C2=CC=CC=C2C3=CC=CC=C31)=O)C4CCCCC4	161321-36-4
Cycle1	cacttggtaAG	taccaagtgCA	O=C(O)[C@@H](NC(OCC1C2=CC=CC=C2C3=CC=CC=C31)=O)CC4=CC=CC=C4F	205526-26-7
Cycle1	aaagtccgcAG	gcggactttCA	FC=1C=CC(=CC1F)C[C@H](C(O)=O)NC(OCC2C3=CC=CC=C3C4=CC=CC=C42)=O	198545-59-4
Cycle1	ttacctggaAG	tccaggtaaCA	FC=1C=CC(=CC1)C[C@@H](C(O)=O)NC(OCC2C3=CC=CC=C3C4=CC=CC=C42)=O	169243-86-1
Cycle1	tgaacacgtAG	acgtgttcaCA	C1=CC=C2CN([C@H](CC2=C1)C(=O)O)C(=O)OCC3C4=CC=CC=C4C5=CC=CC=C53	130309-33-0
Cycle1	cgaacacaaAG	ttgtgttcgCA	O=C(O)[C@H](NC(OCC1C2=CC=CC=C2C3=CC=CC=C31)=O)CC4=CC=CC=C4Cl	205526-22-3
Cycle1	cttggacgaAG	tcgtccaagCA	N#CC=1C=CC(=CC1)C[C@@H](C(O)=O)NC(OCC2C3=CC=CC=C3C4=CC=CC=C42)=O	173963-93-4
Cycle1	ctgtttctgAG	cagaaacagCA	CC(C)(OC(N1CCCC(C1)CC(NC(OCC2C3=CC=CC=C3C4=CC=CC=C42)=O)C(O)=O)=O)C	457060-97-8
Cycle1	gaggcacatAG	atgtgcctcCA	C[C@]1(CCCN1C(=O)OCC2C3=CC=CC=C3C4=CC=CC=C42)C(=O)O	167275-47-0
Cycle1	acaattgcgAG	cgcaattgtCA	C(F)(C1=CC=C(C[C@@H](C(O)=O)NC(=O)OCC2C3=C(C4=C2C=CC=C4)C=CC=C3)C=C1)F	1808268-08-7
Cycle1	gtatccgatAG	atcggatacCA	C1CN(C[C@@H](C(=O)O)NC(OCC2C3=C(C4=C2C=CC=C4)C=CC=C3)=O)CCO1	1251903-85-1
Cycle1	ggtttgtacAG	gtacaaaccCA	C1=CC=C2C(=C1)C3=CC=CC=C3C2COC(=O)N4CCC[C@@H]4CC(=O)O	193693-61-7
Cycle1	tatccccttAG	aaggggataCA	C1=CC=C2C(=C1)C3=CC=CC=C3C2COC(=O)N4CC[C@@H]4C(=O)O	374791-02-3
Cycle1	caggtctcaAG	tgagacctgCA	O=C(O)C1(NC(OCC2C3=CC=CC=C3C4=CC=CC=C42)=O)CCC5=CC=CC=C51	214139-28-3
Cycle1	gtcttcaagAG	cttgaagacCA	C1=CC=C2C(=C1)CN(C2C(=O)O)C(=O)OCC3C4=CC=CC=C4C5=CC=CC=C53	204320-59-2
Cycle1	agcagtcagAG	ctgactgctCA	O=C(O)[C@@H](NC(OCC1C2=CC=CC=C2C3=CC=CC=C31)=O)C/C=C/C4=CC=CC=C4	159610-82-9
Cycle1	gtgtctccaAG	tggagacacCA	C1CC[C@H]2[C@@H](C1)C[C@@H](C(=O)O)N2C(=O)OCC3C4=CC=CC=C4C5=CC=CC=C53	214750-71-7
Cycle1	accctactaAG	tagtagggtCA	CC(C)(C)OC(=O)N1CCN(C1C(=O)O)C(=O)OCC2C3=CC=CC=C3C4=CC=CC=C42	207129-12-2
Cycle1	gtcgggattAG	aatcccgacCA	C1(C2=C(C=CC=C2)C3=C1C=CC=C3)COC(NCC(C(=O)O)C4=CC=C(C=C4)Cl)=O	683217-64-3
Cycle1	cgctgtgatAG	atcacagcgCA	FC=1C=CC(=CC1F)C[C@@H](C(O)=O)NC(OCC2C3=CC=CC=C3C4=CC=CC=C42)=O	198560-43-9
Cycle1	gtttctgtcAG	gacagaaacCA	CC1=CC=CC=C1C[C@H](NC(OCC2C3=CC=CC=C3C4=CC=CC=C42)=O)C(O)=O	211637-75-1
Cycle1	ttggcctctAG	agaggccaaCA	FC(F)(F)C=1C=CC(=CC1)C[C@H](C(O)=O)NC(OCC2C3=CC=CC=C3C4=CC=CC=C42)=O	238742-88-6
Cycle1	gcgcaagaaAG	ttcttgcgcCA	C1=CC=C2C(=C1)C3=CC=CC=C3C2COC(=O)N4C[C@H](C[C@@H]4C(=O)O)O	139262-20-7
Cycle1	ggtagctaaAG	ttagctaccCA	O=C(O)[C@H]1C[C@H](CC1)NC(OCC2C3=CC=CC=C3C4=CC=CC=C42)=O	220497-67-6
Cycle1	agatcagcaAG	tgctgatctCA	CC(C)(OC(N1C[C@@H](C(O)=O)[C@H](NC(OCC2C3=CC=CC=C3C4=CC=CC=C42)=O)C1)=O)C	267230-44-4
Cycle1	caatctggaAG	tccagattgCA	C1=CC=C2C(=C1)C3=CC=CC=C3C2COC(=O)N4CCC[C@@H]4COCC(=O)O	1335206-44-4
Cycle1	aggcaatgcAG	gcattgcctCA	C=CCC[C@@H](NC(OCC1C2=CC=CC=C2C3=CC=CC=C31)=O)C(O)=O	865352-21-2
Cycle1	ttgggtaacAG	gttacccaaCA	C1=CC=C2C(=C1)C3=CC=CC=C3C2COC(=O)N4CCOC[C@@H]4C(=O)O	942153-03-9
Cycle1	cggtccttaAG	taaggaccgCA	O=C(O)[C@H](C1CC1)NC(OCC2C3=CC=CC=C3C4=CC=CC=C42)=O	1212257-18-5
Cycle1	gctaagtgcAG	gcacttagcCA	CC(C)(OC(N1CCC(C(NC(OCC2C3=CC=CC=C3C4=CC=CC=C42)=O)C(O)=O)CC1)=O)C	313051-96-6
Cycle1	aggggtgatAG	atcacccctCA	CC(C)(OC(N1CCCC(C(NC(OCC2C3=CC=CC=C3C4=CC=CC=C42)=O)CC(O)=O)C1)=O)C	372144-11-1
Cycle1	tggacctgaAG	tcaggtccaCA	O=C(O)C[C@@H](C1=CC=C(C#N)C=C1)NC(OCC2C3=CC=CC=C3C4=CC=CC=C42)=O	507472-24-4
Cycle1	catacatcgAG	cgatgtatgCA	CN1C=C(C2=CC=CC=C21)C[C@@H](NC(OCC3C4=CC=CC=C4C5=CC=CC=C53)=O)C(O)=O	168471-22-5
Cycle1	tcaacccctAG	aggggttgaCA	FC(F)(F)C=1C=CC(=CC1)C[C@@H](CC(O)=O)NC(OCC2C3=CC=CC=C3C4=CC=CC=C42)=O	270065-81-1
Cycle1	tttctctcgAG	cgagagaaaCA	FC1=CC=CC(C[C@H](CC(O)=O)NC(OCC2C3=CC=CC=C3C4=CC=CC=C42)=O)=C1	331763-67-8
Cycle1	actgtctacAG	gtagacagtCA	N#CC1=CC=CC(C[C@H](CC(O)=O)NC(OCC2C3=CC=CC=C3C4=CC=CC=C42)=O)=C1	269726-84-3
Cycle1	tggggctttAG	aaagccccaCA	O=C(O)C[C@H](NC(OCC1C2=CC=CC=C2C3=CC=CC=C31)=O)CC4=CC=CC=C4Cl	268734-29-8
Cycle1	tcgcctagaAG	tctaggcgaCA	C1=CC=C2C(=C1)C3=CC=CC=C3C2COC(=O)N4CCC[C@H]4CC(=O)O	193693-60-6
Cycle1	cacaatcggAG	ccgattgtgCA	C1=CC=C2CN([C@H](CC2=C1)CC(=O)O)C(=O)OCC3C4=CC=CC=C4C5=CC=CC=C53	332064-67-2
Cycle1	gtcggacaaAG	ttgtccgacCA	ClC=1C=CC(=CC1)C[C@H](CC(O)=O)NC(OCC2C3=CC=CC=C3C4=CC=CC=C42)=O	331763-60-1
Cycle1	gcgactgatAG	atcagtcgcCA	ClC=1C=CC(=C(C1)Cl)C[C@@H](CC(O)=O)NC(OCC2C3=CC=CC=C3C4=CC=CC=C42)=O	270063-49-5
Cycle1	cctccagttAG	aactggaggCA	ClC=1C=CC(=C(C1)Cl)C[C@H](CC(O)=O)NC(OCC2C3=CC=CC=C3C4=CC=CC=C42)=O	269396-54-5
Cycle1	cagaacactAG	agtgttctgCA	FC=1C=CC(=CC1)C[C@@H](CC(O)=O)NC(OCC2C3=CC=CC=C3C4=CC=CC=C42)=O	270062-83-4
Cycle1	tcataggcgAG	cgcctatgaCA	O=C(O)C[C@H](CC1=CC=CS1)NC(OCC2C3=CC=CC=C3C4=CC=CC=C42)=O	269726-90-1
Cycle1	tgcgagcatAG	atgctcgcaCA	O=C(O)C[C@H](CC1=CSC2=CC=CC=C12)NC(OCC3C4=CC=CC=C4C5=CC=CC=C53)=O	270063-46-2
Cycle1	accccaaaaAG	ttttggggtCA	BrC=1C=CC(=CC1)C[C@H](CC(O)=O)NC(OCC2C3=CC=CC=C3C4=CC=CC=C42)=O	331763-76-9
Cycle1	ggccatatgAG	catatggccCA	ClC=1C=CC(=CC1)C[C@@H](CC(O)=O)NC(OCC2C3=CC=CC=C3C4=CC=CC=C42)=O	270596-43-5
Cycle1	ggagcgtttAG	aaacgctccCA	ClC=1C=CC(=CC1Cl)C[C@H](CC(O)=O)NC(OCC2C3=CC=CC=C3C4=CC=CC=C42)=O	269396-57-8
Cycle1	catgttgacAG	gtcaacatgCA	FC(F)(F)C=1C=CC(=CC1)C[C@H](CC(O)=O)NC(OCC2C3=CC=CC=C3C4=CC=CC=C42)=O	269726-78-5
Cycle1	gctcacacaAG	tgtgtgagcCA	O=C(O)C[C@H](C1=CC=C(Cl)C=C1)NC(OCC2C3=CC=CC=C3C4=CC=CC=C42)=O	479064-92-1
Cycle1	aggccgattAG	aatcggcctCA	O=C(O)C[C@H](C1=CC(Cl)=CC=C1)NC(OCC2C3=CC=CC=C3C4=CC=CC=C42)=O	511272-53-0
Cycle1	cgcgtttagAG	ctaaacgcgCA	C1CCC(C1)C[C@H](C(=O)O)NC(=O)OCC2C3=C(C=CC=C3)C4=C2C=CC=C4	1262802-59-4
Cycle1	tacatgaggAG	cctcatgtaCA	C=CC[C@H](NC(OCC1C2=CC=CC=C2C3=CC=CC=C31)=O)C(O)=O	146549-21-5
Cycle1	ggttattccAG	ggaataaccCA	O=[N+]([O-])C=1C=CC(=CC1)C[C@H](CC(O)=O)NC(OCC2C3=CC=CC=C3C4=CC=CC=C42)=O	269398-78-9
Cycle1	atgcgaaccAG	ggttcgcatCA	O=[N+]([O-])C=1C=CC(=CC1)C[C@@H](CC(O)=O)NC(OCC2C3=CC=CC=C3C4=CC=CC=C42)=O	270062-88-9
Cycle1	acctgttcgAG	cgaacaggtCA	CC(=O)NCSC[C@@H](C(=O)O)NC(=O)OCC1C2=CC=CC=C2C3=CC=CC=C13	86060-81-3
Cycle1	ggctttgaaAG	ttcaaagccCA	CC(C)(C)OC(=O)NCCCC[C@@H](C(=O)O)NC(=O)OCC1C2=CC=CC=C2C3=CC=CC=C13	71989-26-9
Cycle1	taaacgaccAG	ggtcgtttaCA	C1C[C@H](N(C1)C(=O)OCC2C3=CC=CC=C3C4=CC=CC=C24)C(=O)O	71989-31-6
Cycle1	cctgaaagcAG	gctttcaggCA	CC(C(C(=O)O)NC(=O)OCC1C2=CC=CC=C2C3=CC=CC=C13)OC(C)(C)C	71989-35-0
Cycle1	tgggattgcAG	gcaatcccaCA	CSCCC(C(=O)O)NC(=O)OCC1C2=CC=CC=C2C3=CC=CC=C13	71989-28-1
Cycle1	cttgcatgaAG	tcatgcaagCA	CC(C)(C)OCC(C(=O)O)NC(=O)OCC1C2=CC=CC=C2C3=CC=CC=C13	128107-47-1
Cycle1	gaagcctcaAG	tgaggcttcCA	CC(C)C(C(=O)O)NC(=O)OCC1C2=CC=CC=C2C3=CC=CC=C13	68858-20-8
Cycle1	actcccaacAG	gttgggagtCA	CC(C)CC(C(=O)O)NC(=O)OCC1C2=CC=CC=C2C3=CC=CC=C13	35661-60-0
Cycle1	tgtgctaccAG	ggtagcacaCA	C1=CC=C(C=C1)CC(C(=O)O)NC(=O)OCC2C3=CC=CC=C3C4=CC=CC=C24	35661-40-6
Cycle1	ccgtcctatAG	ataggacggCA	CC(C(=O)O)NC(=O)OCC1C2=CC=CC=C2C3=CC=CC=C13	35661-39-3
Cycle1	actcctgcaAG	tgcaggagtCA	CC(C)(C)OC(=O)CCC(C(=O)O)NC(=O)OCC1C2=CC=CC=C2C3=CC=CC=C13	71989-18-9
Cycle1	tatctggccAG	ggccagataCA	CC(C)(C)OC(=O)CC(C(=O)O)NC(=O)OCC1C2=CC=CC=C2C3=CC=CC=C13	71989-14-5
Cycle1	atgcgctgaAG	tcagcgcatCA	C1=CC=C2C(=C1)C(C3=CC=CC=C32)COC(=O)NCC(=O)O	29022-11-5
Cycle1	ctagtctacAG	gtagactagCA	CCC(C)C(C(=O)O)NC(=O)OCC1C2=CC=CC=C2C3=CC=CC=C13	71989-23-6
Cycle1	cataccgatAG	atcggtatgCA	COC(=O)CC(C(=O)O)NC(=O)OCC1C2=CC=CC=C2C3=CC=CC=C13	145038-53-5
Cycle1	tgacgtgcaAG	tgcacgtcaCA	CC(C)(C)OCC(C(=O)O)NC(=O)OCC1C2=CC=CC=C2C3=CC=CC=C13	71989-33-8
Cycle1	ccactggatAG	atccagtggCA	CC(C(=O)O)NC(=O)OCC1C2=CC=CC=C2C3=CC=CC=C13	79990-15-1
Cycle1	catctatccAG	ggatagatgCA	CC(C)CC(C(=O)O)NC(=O)OCC1C2=CC=CC=C2C3=CC=CC=C13	114360-54-2
Cycle1	caagccgtaAG	tacggcttgCA	CSCCC(C(=O)O)NC(=O)OCC1C2=CC=CC=C2C3=CC=CC=C13	112883-40-6
Cycle1	gcttagtcaAG	tgactaagcCA	C1=CC=C(C=C1)CC(C(=O)O)NC(=O)OCC2C3=CC=CC=C3C4=CC=CC=C24	86123-10-6
Cycle1	gtgtggatcAG	gatccacacCA	CCCCC(C(=O)O)NC(=O)OCC1C2=CC=CC=C2C3=CC=CC=C13	112883-41-7
Cycle1	gtcactggaAG	tccagtgacCA	CC(C)(C)OC(=O)CCC(C(=O)O)NC(=O)OCC1C2=CC=CC=C2C3=CC=CC=C13	104091-08-9
Cycle1	cataccacgAG	cgtggtatgCA	CC(C)C(C(=O)O)NC(=O)OCC1C2=CC=CC=C2C3=CC=CC=C13	84624-17-9
Cycle1	ctcactaacAG	gttagtgagCA	CC(C(C(=O)O)NC(=O)OCC1C2=CC=CC=C2C3=CC=CC=C13)OC(C)(C)C	138797-71-4
Cycle1	gttatacggAG	ccgtataacCA	CC(C)(C)OC1=CC=C(C=C1)CC(C(=O)O)NC(=O)OCC2C3=CC=CC=C3C4=CC=CC=C24	118488-18-9
Cycle1	acagagtagAG	ctactctgtCA	C1CC(N(C1)C(=O)OCC2C3=CC=CC=C3C4=CC=CC=C24)C(=O)O	101555-62-8
Cycle1	gtatgcagtAG	actgcatacCA	C1=CC=C(C=C1)CCC(C(=O)O)NC(=O)OCC2C3=CC=CC=C3C4=CC=CC=C24	135994-09-1
Cycle1	cacaatgccAG	ggcattgtgCA	C1=CC=C2C(=C1)C(C3=CC=CC=C32)COC(=O)NCCC(=O)O	35737-10-1
Cycle1	gccatgtgtAG	acacatggcCA	C1CCC(CC1)CC(C(=O)O)NC(=O)OCC2C3=CC=CC=C3C4=CC=CC=C24	135673-97-1
Cycle1	gagacggatAG	atccgtctcCA	C	C
Cycle2	ATGCTGAGGGT	CCTCAGCATCT	C1C[C@@H](C(=O)O)NC1	147-85-3	C1=CC2=C(C=C1[N+](=O)[O-])C(=O)C(=O)N2		611-09-6
Cycle2	GTTTGGGGAGT	TCCCCAAACCT	C1C[C@@H](C(=O)O)NC1	147-85-3	C1=CC2=C(C=C1[N+](=O)[O-])C(=O)C(=O)N2		611-09-6
Cycle2	GCAAAGGACGT	GTCCTTTGCCT	C1C[C@@H](C(=O)O)NC1	147-85-3	C1=CC2=C(C=C1[N+](=O)[O-])C(=O)C(=O)N2		611-09-6
Cycle2	TTACCCCTCGT	GAGGGGTAACT	C1C[C@@H](C(=O)O)NC1	147-85-3	C1=CC2=C(C=C1[N+](=O)[O-])C(=O)C(=O)N2		611-09-6
Cycle2	CGTGTATGCGT	GCATACACGCT	C1C[C@@H](C(=O)O)NC1	147-85-3	C1=CC2=C(C=C1[N+](=O)[O-])C(=O)C(=O)N2		611-09-6
Cycle2	TATCGCCACGT	GTGGCGATACT	C1C[C@@H](C(=O)O)NC1	147-85-3	C1=CC2=C(C=C1[N+](=O)[O-])C(=O)C(=O)N2		611-09-6
Cycle2	CAATGACCCGT	GGGTCATTGCT	C1C[C@@H](C(=O)O)NC1	147-85-3	C1=CC2=C(C=C1[N+](=O)[O-])C(=O)C(=O)N2		611-09-6
Cycle2	TGCGACTGTGT	ACAGTCGCACT	C1C[C@@H](C(=O)O)NC1	147-85-3	C1=CC2=C(C=C1[N+](=O)[O-])C(=O)C(=O)N2		611-09-6
Cycle2	GCAAATCCCGT	GGGATTTGCCT	C1C[C@@H](C(=O)O)NC1	147-85-3	C1=CC2=C(C=C1[N+](=O)[O-])C(=O)C(=O)N2		611-09-6
Cycle2	GGTGCAACAGT	TGTTGCACCCT	C1C[C@@H](C(=O)O)NC1	147-85-3	C1=CC2=C(C=C1[N+](=O)[O-])C(=O)C(=O)N2		611-09-6
Cycle2	CACCTAAGGGT	CCTTAGGTGCT	C1[C@@H](C(=O)O)NCS1	34592-47-7	C1=CC2=C(C=C1[N+](=O)[O-])C(=O)C(=O)N2		611-09-6
Cycle2	CTTGAACCGGT	CGGTTCAAGCT	C1[C@@H](C(=O)O)NCS1	34592-47-7	C1=CC2=C(C=C1[N+](=O)[O-])C(=O)C(=O)N2		611-09-6
Cycle2	ACTTGCGTGGT	CACGCAAGTCT	C1[C@@H](C(=O)O)NCS1	34592-47-7	C1=CC2=C(C=C1[N+](=O)[O-])C(=O)C(=O)N2		611-09-6
Cycle2	CATCGCGTAGT	TACGCGATGCT	C1[C@@H](C(=O)O)NCS1	34592-47-7	C1=CC2=C(C=C1[N+](=O)[O-])C(=O)C(=O)N2		611-09-6
Cycle2	TTCCCATCCGT	GGATGGGAACT	C1[C@@H](C(=O)O)NCS1	34592-47-7	C1=CC2=C(C=C1[N+](=O)[O-])C(=O)C(=O)N2		611-09-6
Cycle2	AGGTTCAGGGT	CCTGAACCTCT	C1[C@@H](C(=O)O)NCS1	34592-47-7	C1=CC2=C(C=C1[N+](=O)[O-])C(=O)C(=O)N2		611-09-6
Cycle2	ATGGACCCAGT	TGGGTCCATCT	C1[C@@H](C(=O)O)NCS1	34592-47-7	C1=CC2=C(C=C1[N+](=O)[O-])C(=O)C(=O)N2		611-09-6
Cycle2	GAAGGCCAAGT	TTGGCCTTCCT	C1[C@@H](C(=O)O)NCS1	34592-47-7	C1=CC2=C(C=C1[N+](=O)[O-])C(=O)C(=O)N2		611-09-6
Cycle2	GGCTTTACCGT	GGTAAAGCCCT	C1[C@@H](C(=O)O)NCS1	34592-47-7	C1=CC2=C(C=C1[N+](=O)[O-])C(=O)C(=O)N2		611-09-6
Cycle2	GCAGTTGGTGT	ACCAACTGCCT	C1[C@@H](C(=O)O)NCS1	34592-47-7	C1=CC2=C(C=C1[N+](=O)[O-])C(=O)C(=O)N2		611-09-6
Cycle2	CTTCGGCATGT	ATGCCGAAGCT	C1[C@H](CN[C@@H]1C(=O)O)O	51-35-4	C1=CC2=C(C=C1[N+](=O)[O-])C(=O)C(=O)N2		611-09-6
Cycle2	AGGTGTCTCGT	GAGACACCTCT	C1[C@H](CN[C@@H]1C(=O)O)O	51-35-4	C1=CC2=C(C=C1[N+](=O)[O-])C(=O)C(=O)N2		611-09-6
Cycle2	TGCGAAGCAGT	TGCTTCGCACT	C1[C@H](CN[C@@H]1C(=O)O)O	51-35-4	C1=CC2=C(C=C1[N+](=O)[O-])C(=O)C(=O)N2		611-09-6
Cycle2	GTCATAGGGGT	CCCTATGACCT	C1[C@H](CN[C@@H]1C(=O)O)O	51-35-4	C1=CC2=C(C=C1[N+](=O)[O-])C(=O)C(=O)N2		611-09-6
Cycle2	ACGGAGTTGGT	CAACTCCGTCT	C1[C@H](CN[C@@H]1C(=O)O)O	51-35-4	C1=CC2=C(C=C1[N+](=O)[O-])C(=O)C(=O)N2		611-09-6
Cycle2	CTACCGATCGT	GATCGGTAGCT	C1[C@H](CN[C@@H]1C(=O)O)O	51-35-4	C1=CC2=C(C=C1[N+](=O)[O-])C(=O)C(=O)N2		611-09-6
Cycle2	ACTCTGCGAGT	TCGCAGAGTCT	C1[C@H](CN[C@@H]1C(=O)O)O	51-35-4	C1=CC2=C(C=C1[N+](=O)[O-])C(=O)C(=O)N2		611-09-6
Cycle2	GCATACACCGT	GGTGTATGCCT	C1[C@H](CN[C@@H]1C(=O)O)O	51-35-4	C1=CC2=C(C=C1[N+](=O)[O-])C(=O)C(=O)N2		611-09-6
Cycle2	GGATTCCCAGT	TGGGAATCCCT	C1[C@H](CN[C@@H]1C(=O)O)O	51-35-4	C1=CC2=C(C=C1[N+](=O)[O-])C(=O)C(=O)N2		611-09-6
Cycle2	AACGGCTAGGT	CTAGCCGTTCT	C1[C@H](CN[C@@H]1C(=O)O)O	51-35-4	C1=CC2=C(C=C1[N+](=O)[O-])C(=O)C(=O)N2		611-09-6
Cycle3	ACTGTAGGGGA	CCCTACAGTAC	ClC1=CC(=CC=C1[N]2C=CN=C2)C=O	870837-48-2
Cycle3	GGGTCTTTGGA	CAAAGACCCAC	ClC1=C(C=CC(=C1)C=O)N2CCOCC2	886500-23-8
Cycle3	TCTAGGGGTGA	ACCCCTAGAAC	O=CC1=C[N](N=C1)C2=CC=CC=C2	54605-72-0
Cycle3	CGTCAATCCGA	GGATTGACGAC	O=CC1=C2N=CC=CC2=CC=C1	38707-70-9
Cycle3	AGAAGCGAGGA	CTCGCTTCTAC	O=CC1=C[NH]C=C1	7126-39-8
Cycle3	CGTGTTCGTGA	ACGAACACGAC	OC(=O)C1=CC(=CN=C1)C2=CC=C(C=O)C=C2	566198-28-5
Cycle3	ACGTCTAGCGA	GCTAGACGTAC	CC(C)(C)OC(=O)N1CCC(C1)C=O	59379-02-1
Cycle3	TAGTACCGCGA	GCGGTACTAAC	O=CC1=CC=CC=C1OC2=CC=CC=C2	19434-34-5
Cycle3	AGTCGTAGGGA	CCTACGACTAC	CN1CCN(CC1)C2=CC(=CC=C2)C=O	628325-62-2
Cycle3	TACCTGGAGGA	CTCCAGGTAAC	O=CC1=CC=CC=C1C2=CC=CC=C2	1203-68-5
Cycle3	GTTAGGCAGGA	CTGCCTAACAC	O=CC1=C2C=CC=CC2=CC3=CC=CC=C13	642-31-9
Cycle3	TTCCAAGCGGA	CGCTTGGAAAC	CCCCC1=NC(=C(Cl)[NH]1)C=O	83857-96-9
Cycle3	CCTTATGGCGA	GCCATAAGGAC	O=CC1=CC=C(S1)C2=CC=CC=C2	19163-21-4
Cycle3	TGATGGCACGA	GTGCCATCAAC	O=CC1=CN=CS1	1003-32-3
Cycle3	TTCGTGCTCGA	GAGCACGAAAC	O=CC1=NC2=CC=CC=C2[NH]1	3314-30-5
Cycle3	TCATGCCTGGA	CAGGCATGAAC	CC1=CN=C(S1)C=O	13838-78-3
Cycle3	TGAGGGTCTGA	AGACCCTCAAC	C[S](=O)(=O)NC1=CC=C(C=O)C=C1	83922-54-7
Cycle3	CAGCAACGTGA	ACGTTGCTGAC	O=CC1=CN=C2C=CC=C[N]12	6188-43-8
Cycle3	ATAGGCGAGGA	CTCGCCTATAC	FC1=CC=C(C(=C1)F)C2=CC=CC(=N2)C=O	887979-81-9
Cycle3	CCCGGATATGA	ATATCCGGGAC	O=CC1=CC=C(C=C1)N2CCCC2	51980-54-2
Cycle3	TTCTGCCGAGA	TCGGCAGAAAC	C[S](=O)(=O)NC1=CC=CC=C1C=O	94532-99-7
Cycle3	GCTCTGACAGA	TGTCAGAGCAC	FC1=NC=C(C=O)C=C1	677728-92-6
Cycle3	CGTCACACAGA	TGTGTGACGAC	CCOC1=CC(=CC=C1O)C=O	121-32-4
Cycle3	TAGTGACCCGA	GGGTCACTAAC	O=CC1=NC=CC=C1	1121-60-4
Cycle3	GGTTATCGGGA	CCGATAACCAC	COC(=O)C1=CC=C(S1)C=O	67808-64-4
Cycle3	TTACCGTGCGA	GCACGGTAAAC	CC1=C(C=O)[C](=O)[NH][C](=O)[NH]1	24048-74-6
Cycle3	GGAAAGGCAGA	TGCCTTTCCAC	O=CC1=CC=C(C=C1)C#CC2=CC=CC=C2	57341-98-7
Cycle3	TGTTGGACGGA	CGTCCAACAAC	O=CC1=CC=CC=C1N2CCCC2	58028-74-3
Cycle3	AGGTTGGGAGA	TCCCAACCTAC	ClC1=NC=CC=C1C=O	36404-88-3
Cycle3	GACATCGGAGA	TCCGATGTCAC	O=CC1=CC=C(OC2=CC=CC=C2)C=C1	67-36-7
Cycle3	GCAACTCACGA	GTGAGTTGCAC	C[N]1N=CC=C1C=O	27258-33-9
Cycle3	CTCATAGCGGA	CGCTATGAGAC	OC(=O)C1=CC=CC(=C1)C=O	619-21-6
Cycle3	GATGGAGCTGA	AGCTCCATCAC	OC1=CC=CC(=C1C=O)Cl	18362-30-6
Cycle3	CCACCATCAGA	TGATGGTGGAC	O=CC1CC1	1489-69-6
Cycle3	AGGTCCAGTGA	ACTGGACCTAC	O=CC1=CC=CS1	98-03-3
Cycle3	GGTGTCTCTGA	AGAGACACCAC	OC(=O)C1=CC=CC=C1C=O	119-67-5
Cycle3	ACGCTAGACGA	GTCTAGCGTAC	C#CC1=CC=C(C=C1)C=O	63697-96-1
Cycle3	GGAGTCCTTGA	AAGGACTCCAC	NC1=C(C#N)C(=C(S1)C=O)Cl	104366-23-6
Cycle3	GGTTTCGGTGA	ACCGAAACCAC	C[N]1C=C(C=O)C=N1	25016-11-9
Cycle3	AGCCTCAGAGA	TCTGAGGCTAC	OC1=CC(=CC=C1C=O)Cl	2420-26-0
Cycle3	TACGGACACGA	GTGTCCGTAAC	O=CC1=NC=CS1	10200-59-6
Cycle3	GTCACGATCGA	GATCGTGACAC	OC1=CC=C(C=O)C(=C1)Cl	56962-11-9
Cycle3	GTGATTCGCGA	GCGAATCACAC	COC(=O)C1=CC(=CC=C1O)C=O	41489-76-3
Cycle3	AGCGGTTTGGA	CAAACCGCTAC	NC1=NC(=C(C=O)C(=N1)Cl)Cl	5604-46-6
Cycle3	TTGAGGCGAGA	TCGCCTCAAAC	CC1=N[NH]C=C1C=O	112758-40-4
Cycle3	ACAAGCGCTGA	AGCGCTTGTAC	ClC1=CC(=CC(=C1)Cl)OC2=CC=CC(=C2)C=O	81028-92-4
Cycle3	TACGGAAGCGA	GCTTCCGTAAC	CCOC(=O)C=O	924-44-7
Cycle3	CCGTATTGCGA	GCAATACGGAC	OC1=CC(=CC=C1)C=O	100-83-4
Cycle3	GATCATGGCGA	GCCATGATCAC	CC(C)(C)OC(=O)N1CCCCC1C=O	157634-02-1
Cycle3	GCTGGGTATGA	ATACCCAGCAC	CCOC(=O)C1=C(C)[NH]C(=C1C)C=O	2199-59-9
Cycle3	GGTTGTGAGGA	CTCACAACCAC	O=CC1=CC2=CC=CN=C2C=C1	4113-04-6
Cycle3	GTGTCCAGTGA	ACTGGACACAC	FC(F)OC1=CC=C(C=O)C=C1	73960-07-3
Cycle3	ATCCGAGTGGA	CACTCGGATAC	CC(C)(C)OC(=O)N1CCCC1C=O	69610-41-9
Cycle3	GTGGACTTCGA	GAAGTCCACAC	C[N]1C=C(C=O)C2=CC=CC=C12	19012-03-4
Cycle3	CGATAGACGGA	CGTCTATCGAC	NC1=NC=CC=C1C=O	7521-41-7
Cycle3	CCTTGCTGTGA	ACAGCAAGGAC	FC1=CC2=C(C=C1)C(=C[NH]2)C=O	2795-41-7
Cycle3	CTGCAGTGTGA	ACACTGCAGAC	O=CC1=CC2=C(OCC2)C=C1	55745-70-5
Cycle3	GTCGATCCAGA	TGGATCGACAC	O=CC1=C[NH]C=N1	3034-50-2
Cycle3	GTTGGAGCAGA	TGCTCCAACAC	FC1=CC=CC=C1C=O	446-52-6
Cycle3	ATGAGCCCAGA	TGGGCTCATAC	FC1=CC=C(C=O)C=C1	459-57-4
Cycle3	CTTTGGCCTGA	AGGCCAAAGAC	CC1=C(SC=N1)C=O	82294-70-0
Cycle3	TCCAGAGACGA	GTCTCTGGAAC	ClC1=CC(=CC(=C1)C=O)Cl	10203-08-4
Cycle3	GGTGATTCGGA	CGAATCACCAC	CC1=C(O)C(=CC(=C1)C=O)C	2233-18-3
Cycle3	CGTAACTGCGA	GCAGTTACGAC	FC(F)OC1=CC=CC=C1C=O	71653-64-0
Cycle3	CGAGCACTAGA	TAGTGCTCGAC	OB(O)C1=CC=C(C=O)C=C1	87199-17-5
Cycle3	TTGTACCCCGA	GGGGTACAAAC	ClC1=CC=C(C=O)C=N1	23100-12-1
Cycle3	TGGTGACAGGA	CTGTCACCAAC	O=CC1=CC=C(C=C1)C2=NC=CC=C2	127406-56-8
Cycle3	ACTAGGCCAGA	TGGCCTAGTAC	CC1=C(C(O)=O)C(=C([NH]1)C=O)C	253870-02-9
Cycle3	TCAAGCTGCGA	GCAGCTTGAAC	FC1=CC=CN=C1C=O	31224-43-8
Cycle3	CAGGGTAGAGA	TCTACCCTGAC	FC1=C(C=O)C(=CC=C1)F	437-81-0
Cycle3	TCGAACGCTGA	AGCGTTCGAAC	ClC1=CC=C(C=O)C=C1	104-88-1
Cycle3	AGCGTACTCGA	GAGTACGCTAC	ClC1=CC(=CC=C1)C=O	587-04-2
Cycle3	GGTAGGATCGA	GATCCTACCAC	CC[N]1C=CN=C1C=O	111851-98-0
Cycle3	AGGCGTTACGA	GTAACGCCTAC	CC1=NC=C(C=O)C=C1	53014-84-9
Cycle3	TAGCCGCAAGA	TTGCGGCTAAC	COC(=O)C1=CC2=C(C=C1)C(=C[NH]2)C=O	133831-28-4
Cycle3	GCCCTTATCGA	GATAAGGGCAC	COC1=CC(=CC=C1C=O)C#N	21962-45-8
Cycle3	GGGCTTAACGA	GTTAAGCCCAC	CC1=C(C=O)N=CC=C1	55589-47-4
Cycle3	GGCGGTAAAGA	TTTACCGCCAC	C[N]1C=CC(=N1)C=O	27258-32-8
Cycle3	TACTACGGCGA	GCCGTAGTAAC	OC1=C(C=O)C=C(F)C=C1	347-54-6
Cycle3	GTGGCAACAGA	TGTTGCCACAC	O=CC1=C[NH]C2=C1C=C(OCC3=CC=CC=C3)C=C2	6953-22-6
Cycle3	TCAGGGGTTGA	AACCCCTGAAC	O=CC1=CC=C[NH][C]1=O	36404-89-4
Cycle3	TTCGGATCGGA	CGATCCGAAAC	O=CC1=CC=CC(=C1)C#N	24964-64-5
Cycle3	AGCCGTTCTGA	AGAACGGCTAC	ClC1=C(C=O)C(=CC=C1)Cl	83-38-5
Cycle3	AAATGGCGGGA	CCGCCATTTAC	ClC1=CC=C(C=O)C(=C1)Cl	874-42-0
Cycle3	AAATGCGGGGA	CCCGCATTTAC	FC(F)(F)C1=CC=C(C=O)C=N1	386704-12-7
Cycle3	GAAAAGCCGGA	CGGCTTTTCAC	C[S](=O)(=O)C1=CC=CC=C1C=O	5395-89-1
Cycle3	TGAGCCACTGA	AGTGGCTCAAC	O=CC1=CSC=C1	498-62-4
Cycle3	GCGACAGTAGA	TACTGTCGCAC	OB(O)C1=CC=CC(=C1)C=O	87199-16-4
Cycle3	CCTAGCACTGA	AGTGCTAGGAC	FC1=CC=C(C=O)C=C1C#N	218301-22-5
Cycle3	GGGGAAGATGA	ATCTTCCCCAC	O=CC1=CC=C(C=C1)[N]2C=CN=C2	10040-98-9
Cycle3	CCGGATCATGA	ATGATCCGGAC	OCC(O)C(O)CC=O	18546-37-7
Cycle3	GTTTGGCACGA	GTGCCAAACAC	FC1=C(F)C(=CC(=C1)C=O)F	132123-54-7
Cycle3	CGCAACGAAGA	TTCGTTGCGAC	O=CC1=CC=C(C=C1)[N]2C=CC=N2	99662-34-7
Cycle3	GACGTGGAAGA	TTCCACGTCAC	CC1=CC=C(C=C1)[S](=O)(=O)C2=CC=CC=C2C=O	171503-27-8
Cycle3	TAGAGTCCGGA	CGGACTCTAAC	O=CC1=C2C=CC=CC2=CC=C1	66-77-3
Cycle3	TGTCCTGCAGA	TGCAGGACAAC	OC1=CC=C(C=O)C=C1	123-08-0
Cycle3	GCACATCACGA	GTGATGTGCAC	C1=CC(=C(C=C1O)O)C=O	95-01-2
Cycle3	GCCCAATTCGA	GAATTGGGCAC	CC=O	75-07-0
Cycle3	CTTACCAGCGA	GCTGGTAAGAC	C1CCN(CC1)C2=CC=CC=C2C=O	34595-26-1
Cycle3	GAAGGCCTAGA	TAGGCCTTCAC	C1=CC(=CC(=C1)F)COC2=CC=C(C=C2)C=O	66742-57-2
Cycle3	ACCTGAGCTGA	AGCTCAGGTAC	C(=O)NNC=O	628-36-4
Cycle3	GCTCCATGAGA	TCATGGAGCAC	CN(C)C1=CC(=C(C=C1)C=O)Cl	1424-66-4
Cycle3	TCCACATCCGA	GGATGTGGAAC	C1=CC=C2C(=C1)C(=CS2)C=O	5381-20-4
Cycle3	TCTCCGTGTGA	ACACGGAGAAC	C1=CC=C(C(=C1)C=O)SC2=CC=C(C=C2)Cl	107572-07-6
Cycle3	TACTGGAGGGA	CCTCCAGTAAC	C1=CC(=CC2=C1C=CN2)C=O	1196-70-9
Cycle3	CCTATGGGAGA	TCCCATAGGAC	C1=CC(=C(C=C1F)[N+](=O)[O-])C=O	2923-96-8
Cycle3	CCGATAGCAGA	TGCTATCGGAC	C1=CC(=CC=C1C2=CC=C(O2)C=O)[N+](=O)[O-]	7147-77-5
Cycle3	ATGCGTTGCGA	GCAACGCATAC	C1=CC(=C(N=C1)C=O)F	31224-43-8
Cycle3	ACCCAGAAGGA	CTTCTGGGTAC	CC1=C(SC=N1)C=O	82294-70-0
Cycle3	TTTCCGGCTGA	AGCCGGAAAAC	CC1=CC(=C(N1)C=O)C	2199-58-8
Cycle3	TGAAAGGGGGA	CCCCTTTCAAC	C1=CC(=CC=C1C(=O)C=O)F.O	447-43-8
Cycle3	TCCAGGGTTGA	AACCCTGGAAC	C1=COC(=C1)C=CC=O	623-30-3
Cycle3	GCCAGATCAGA	TGATCTGGCAC	C1COCCN1C2=CC=CC=C2C=O	58028-76-5
Cycle3	AGGTAAGGGGA	CCCTTACCTAC	C1OC2=C(O1)C=C(C=C2)C(=O)C=O.O	1173247-27-2
Cycle3	TGCCTCACTGA	AGTGAGGCAAC	CN1CCN(CC1)C2=CC=C(C=C2)C=O	27913-99-1
Cycle3	GCAGATGTGGA	CACATCTGCAC	C1=CC=C(C(=C1)C=O)C2=CC=CC=C2C(=O)O	6720-26-9
Cycle3	ACGTCCATCGA	GATGGACGTAC	CC(C(=O)O)OC1=CC=CC=C1C=O	29040-34-4
Cycle3	TCTCGAACCGA	GGTTCGAGAAC	COC1=CC=CC2=C1OCC(=C2)C=O	57543-38-1
Cycle3	GTTGCCATGGA	CATGGCAACAC	C1C(=CC2=C(O1)C=CC(=C2)Cl)C=O	57544-34-0
Cycle3	CATAGCCTGGA	CAGGCTATGAC	CC1=C(C2=CC=CC=C2N1CC(=O)N)C=O	61922-00-7
Cycle3	AGTCCACTCGA	GAGTGGACTAC	C1=CC=C2C(=C1)C(=CN2CCC(=O)N)C=O	61922-01-8
Cycle3	CACTCTACGGA	CGTAGAGTGAC	C1=CC=C2C(=C1)C3=C(O2)C(=CC=C3)C=O	96706-46-6
Cycle3	ATGTGGGTGGA	CACCCACATAC	C1=CC=C(C=C1)N2C=C(C(=N2)C3=CC=NC=C3)C=O	371917-81-6
Cycle3	TCCGAGGTTGA	AACCTCGGAAC	COC1=C(C=C(C=C1)C=O)CN2C=CC=N2	436086-89-4
Cycle3	TCACAGTGCGA	GCACTGTGAAC	CC1=C(NC2=C1C=C(C=C2)F)C=O	842972-09-2
Cycle3	CTTCCGAGAGA	TCTCGGAAGAC	CCOC1=CC(=CC(=C1OC)CC=C)C=O	872183-40-9
Cycle3	TGAAGGACCGA	GGTCCTTCAAC	C1=C(SC=C1C#CCO)C=O	887405-37-0
Cycle3	TAGACGCTCGA	GAGCGTCTAAC	CC(C)(C#CC1=CC=C(S1)C=O)O	915921-21-0
Cycle3	GGAAAGTGGGA	CCACTTTCCAC	CC1=CC=CC(=C1)C2=NC=C(C=N2)C=O	915921-67-4
Cycle3	AAGCCACTCGA	GAGTGGCTTAC	C1CCOC(C1)C2=CC=C(O2)C=O	915924-73-1
Cycle3	GAGTGCTGAGA	TCAGCACTCAC	C1=CC(=CC(=C1)F)N2C=C(C=N2)C=O	936940-82-8
Cycle3	GCTCACAGTGA	ACTGTGAGCAC	CN1C=NN=C1SC2=CC=C(O2)C=O	938459-16-6
Cycle3	CACGGTCTAGA	TAGACCGTGAC	CC(C)OC1=C(C=C(C=C1)C=O)CO	959237-03-7
Cycle3	TCGAGGGAAGA	TTCCCTCGAAC	COC1=CC=CC=C1N2C=C(C=N2)C=O	1013835-99-8
Cycle3	CTCACCATGGA	CATGGTGAGAC	COC1=CC(=C(C=C1)N2C=CC=N2)C=O	1015845-56-3
Cycle3	GGCGATGATGA	ATCATCGCCAC	CC1=CC(=C(C(=C1)N2C=CC=N2)C=O)C	1015845-86-9
Cycle3	TACCTTCGCGA	GCGAAGGTAAC	CC1=C(C=CC(=C1)N2C=CC=N2)C=O	1015845-89-2
Cycle3	GAATTGGCCGA	GGCCAATTCAC	CC1=NC(=NC=C1C=O)C2=CC=CC=C2	342405-36-1
Cycle3	AATTGCGGGGA	CCCGCAATTAC	CCCCC1=NC=C(N1)C=O	68282-49-5
Cycle3	TGCCATTGCGA	GCAATGGCAAC	C1CN(CCC1C(=O)O)C2=CC=C(C=C2)C=O	727396-60-3
Cycle3	TCCTTCACGGA	CGTGAAGGAAC	C1=C(C=C(C(=C1Cl)O)C=O)Cl	90-60-8
Cycle3	GAGATGCCAGA	TGGCATCTCAC	C1=CNC2=NC=C(C(=C21)Cl)C=O	958230-19-8
Cycle3	ACTATGGCCGA	GGCCATAGTAC	C1CCN(CC1)C2=CC=C(C=C2)C=O	10338-57-5
Cycle3	ACGGCCTATGA	ATAGGCCGTAC	C1=CC2=C(C=C1C#N)C(=CN2)C=O	17380-18-6
Cycle3	ACGGTGGTAGA	TACCACCGTAC	C1=CSC(=C1)C2=C(C=NN2)C=O	26033-27-2
Cycle3	GCTTATGCCGA	GGCATAAGCAC	C1C2=C(C(=CC(=C2)F)C=O)OCO1	306934-87-2
Cycle3	GGTGACTACGA	GTAGTCACCAC	C1=CC(=C(C=C1[N+](=O)[O-])C=O)OCC(=O)O	6965-69-1
Cycle3	AGCTCACGAGA	TCGTGAGCTAC	C1=CC=C(C=C1)C2=NN(C=C2C=O)C3=CC=CC=C3	21487-45-6
Cycle3	CTAACGGAGGA	CTCCGTTAGAC	CC1=C(C(=O)N(N1C)C2=CC=CC=C2)C=O	950-81-2
Cycle3	TGTAGTCCCGA	GGGACTACAAC	C1=CC=C(C(=C1)C=O)C2=CN=CN=C2	640769-71-7
Cycle3	ACGGTAGCAGA	TGCTACCGTAC	C1=CC=C(C=C1)COC2=C(C=C(C=C2)C=O)Cl	66422-84-2
Cycle3	TGCCCTACAGA	TGTAGGGCAAC	CC1=NN(C2=NC(=C(C=C12)C=O)Cl)C	898911-34-7
Cycle3	CCTGTTTCGGA	CGAAACAGGAC	CC1=CC2=C(C=C1)OC=C(C2=O)C=O	42059-81-4
Cycle3	ATCACCCGAGA	TCGGGTGATAC	C1=CC=C(C=C1)C2=NC(=CS2)C=O	20949-81-9
Cycle3	AAATGCCCGGA	CGGGCATTTAC	C1=CN=CC2=CN=CC(=C21)C=O	10273-40-2
Cycle3	GGTAAGGCTGA	AGCCTTACCAC	C1=CC(=CC=C1C=O)N2C=NC=N2	27996-86-7
Cycle3	TACGACTGGGA	CCAGTCGTAAC	COC1=CC2=C(C=C1)OCC(=C2)C=O	57543-40-5
Cycle3	CACGATCGTGA	ACGATCGTGAC	CC1(OCC(O1)C=O)C	22323-80-4
Cycle3	AAGCTTGCCGA	GGCAAGCTTAC	C1=CC(=NC(=C1C=O)Cl)Cl	55304-73-9
Cycle3	CCATCTGTGGA	CACAGATGGAC	C1=CC=C(C(=C1)C=O)SC2=CC=C(C=C2)Cl	107572-07-6
Cycle3	GACACTTGGGA	CCAAGTGTCAC	C1=CC=C2C(=C1)C=C(N2)C=O	19005-93-7
Cycle3	TCGGAACGAGA	TCGTTCCGAAC	C1=CC(=CC(=C1)N2C=CC=N2)C=O	852227-92-0
Cycle3	AGAACACGCGA	GCGTGTTCTAC	C1=CC=NC(=C1)C2=CC=C(S2)C=O	132706-12-8
Cycle3	GCGTAGTAGGA	CTACTACGCAC	C1=CC(=C(N=C1)OC2=CC=C(C=C2)C#N)C=O	866049-85-6
Cycle3	CGGCATGTAGA	TACATGCCGAC	C1=CC(=C(C=C1Cl)C2=CC=C(O2)C=O)Cl	99113-89-0
Cycle3	CATGCAGCTGA	AGCTGCATGAC	C1=CC(=CC=C1C=O)C2=CC=C(C=C2)F	60992-98-5
Cycle3	CCTTGTGTGGA	CACACAAGGAC	C1C(=C(C2=C(O1)C=CC(=C2)F)Cl)C=O	105799-69-7
Cycle3	TACGTAGGCGA	GCCTACGTAAC	C1COCCC1OC2=NC=C(C=C2)C=O	910036-95-2
Cycle3	CAAGATGGCGA	GCCATCTTGAC	C(=O)C(F)(F)F.O	33953-86-5
Cycle3	CCCATACAGGA	CTGTATGGGAC	C1CCN(CC1)C2=CC=C(S2)C=O	24372-48-3
Cycle3	TTGGGTTCGGA	CGAACCCAAAC	C1=CC=C(C(=C1)N2C=CC=C2C=O)F	132407-65-9
Cycle3	TCCAGCATGGA	CATGCTGGAAC	C1CCOC(C1)N2C(=CC=N2)C=O	957483-88-4
Cycle3	GATTCGTCCGA	GGACGAATCAC	CCC1=C(NC(=C1C)C=O)C	6250-80-2
Cycle3	TGCTTGTGCGA	GCACAAGCAAC	CCCN1C(=CC(=C1C)C=O)C	18870-75-2
Cycle3	CTCGATGAGGA	CTCATCGAGAC	CC1=NN(C=C1C=O)C2=CC=CC=C2	21487-48-9
Cycle3	TGAACGGGAGA	TCCCGTTCAAC	C1=CC=C2C(=C1)C(=CN2CCC(=O)O)C=O	59213-02-4
Cycle3	TTCGGGTCAGA	TGACCCGAAAC	C1C(N(CC2=CC=CC=C21)C=O)C(=O)O	61047-23-2
Cycle3	TTGGCACACGA	GTGTGCCAAAC	COC1=CC2=C(CCC2)C=C1C=O	73615-83-5
Cycle3	GTTCTACCCGA	GGGTAGAACAC	C1=CC(=CC(=C1)CN2C=CC=N2)C=O	78425-11-3
Cycle3	AGGAAGGTCGA	GACCTTCCTAC	C1=CC(=CC(=C1)C=O)C2=CC=CO2	85553-52-2
Cycle3	TAGCTGCTGGA	CAGCAGCTAAC	CC1=CC(=CC=C1)N2C=CC=C2C=O	86454-35-5
Cycle3	CCCACTATCGA	GATAGTGGGAC	C(=O)C1=C(NC(=O)NC1=O)N	87166-64-1
Cycle3	TTCCTAGGGGA	CCCTAGGAAAC	C1=CC(=C(C(=C1)Cl)Cl)C2=CC=C(O2)C=O	106827-26-3
Cycle3	TATCTGGGGGA	CCCCAGATAAC	CN(C)C1=NC(=C(S1)C=O)Cl	129865-54-9
Cycle3	ACGTGACCAGA	TGGTCACGTAC	C1=C(SC(=C1)C#CCO)C=O	133665-84-6
Cycle3	AATCGGACGGA	CGTCCGATTAC	C1=CC=C2C(=C1)C(=CN2CC(=O)N)C=O	312973-43-6
Cycle3	TATGGCAGCGA	GCTGCCATAAC	C1OC2=CC3=CC(=C(N=C3C=C2O1)Cl)C=O	332382-81-7
Cycle3	GAAGGACGAGA	TCGTCCTTCAC	CC1=CC(=C(N1C2=CC3=CC=CC=C3C=C2)C)C=O	347332-17-6
Cycle3	GACTGCTTGGA	CAAGCAGTCAC	CC1=C(C2=CC=CC=C2N1CC(=O)O)C=O	432001-45-1
Cycle3	GTACTCTGGGA	CCAGAGTACAC	CC1=CC(=C(N1N2C=NN=C2)C)C=O	453557-49-8
Cycle3	CCTTTCCCTGA	AGGGAAAGGAC	CC(C)OC(=O)CN1C=C(C2=CC=CC=C21)C=O	708991-26-8
Cycle3	ctagtgctgGA	cagcactagAC	CC1=CC(=C(C=C1)C)C2=C(C=NN2)C=O	720696-71-9
Cycle3	GGGCTTTACGA	GTAAAGCCCAC	CC1=CC=CC2=C1NC(=C2C=O)C	872505-78-7
Cycle3	CTATACCCCGA	GGGGTATAGAC	CC1=C(C(=NN1C2=CC=C(C=C2)F)C)C=O	890626-54-7
Cycle3	ATTCGTCGCGA	GCGACGAATAC	C1CCN(CC1)CC2=CSC(=C2)C=O	893745-85-2
Cycle3	CAGAGGCTTGA	AAGCCTCTGAC	C1=CC=C(C=C1)CNC2=NC=C(C=N2)C=O	946778-44-5
Cycle3	ACTCATGGCGA	GCCATGAGTAC	C1CC(OC1)CNC2=NC=C(C=N2)C=O	959239-06-6
Cycle3	GCCTCAAACGA	GTTTGAGGCAC	C1=COC(=C1)C2=NC=C(C=N2)C=O	959240-19-8
Cycle3	GACGTTGAGGA	CTCAACGTCAC	C1=C(OC(=C1)C2=CC=NN2)C=O	1015939-90-8
Cycle3	GGGCTAGATGA	ATCTAGCCCAC	CC1=C(C(=NN1CC=C)C)C=O	1155595-91-7
Cycle3	TGGTGACCTGA	AGGTCACCAAC		1609403-15-7
Cycle3	CTTGCAGACGA	GTCTGCAAGAC	C1=CC2=CC=NN2C(=C1)C=O	362661-83-4
Cycle3	TACAGCTCGGA	CGAGCTGTAAC	CCCC1=NN=C(O1)C2=CC=C(C=C2)C=O	1061671-93-9
Cycle3	AAAGGGTCGGA	CGACCCTTTAC	C1=CC=C2C(=C1)C3=C(S2)C(=CC=C3)C=O	23985-81-1
Cycle3	GTAGGCCTAGA	TAGGCCTACAC	CCOC(=O)COC1=CC=C(C=C1)C=O	51264-69-8
Cycle3	GCCGTCTAAGA	TTAGACGGCAC	CC(C)CN1C2=CC=CC=C2N=C1C=O	610275-02-0
Cycle3	CTAGCGTAGGA	CTACGCTAGAC	C1=CC=C2C(=C1)C=CC=C2C3=NC=C(C=N3)C=O	915919-73-2
Cycle3	CATTGCTCCGA	GGAGCAATGAC	CCOC(=O)CNC1=NC=C(C=N1)C=O	915920-21-7
Cycle3	CCATATGCCGA	GGCATATGGAC	CC1=CC=C(C=C1)C2=C(C=NN2)C=O	350988-62-4
Cycle3	AGAACTGGCGA	GCCAGTTCTAC	CC1=NN=C(O1)C2=CC=C(C=C2)C=O	179056-82-7
Cycle3	GGCTATCGAGA	TCGATAGCCAC	C1=CC(=C2C(=C1)OC(O2)(F)F)C=O	119895-68-0
Cycle3	CGTCCACTTGA	AAGTGGACGAC	CC1=CC(=CC=C1)COC2=CC=CC=C2C=O	351984-86-6
Cycle3	TCCTGGAAGGA	CTTCCAGGAAC	CC1=C(N=CN1)C=O	68282-53-1
Cycle3	TTCCGCTCTGA	AGAGCGGAAAC	C1=COC(=C1)/C=C/C=O	39511-08-5
Cycle3	GGGCTAGTTGA	AACTAGCCCAC	C1=CC=C(C(=C1)C=O)OC2=CC=C(C=C2)Cl	111826-11-0
Cycle3	TTGTTGCCGGA	CGGCAACAAAC	C1=C(C=C(C=C1F)F)C2=C(C=NN2)C=O	875664-59-8
Cycle3	CCAGGAATGGA	CATTCCTGGAC	C1=CC2=C(C=C1C=O)OC(O2)(F)F	656-42-8
Cycle3	ACTCATCCGGA	CGGATGAGTAC	C1=CC(=CC(=C1)OC2=NC=CN=C2)C=O	887344-44-7
Cycle3	GTCAGTCTCGA	GAGACTGACAC	C1CCN(C1)C2=NC=CC(=C2)C=O	898289-23-1
Cycle3	CGCCAAAGAGA	TCTTTGGCGAC	C1CN(CCC1O)C2=CC=CC=C2C=O.Cl	1185302-49-1
Cycle3	CATGTTGGGGA	CCCAACATGAC	CN1C=C(C=C1C=O)C(=O)C2=CC=CC=C2	128843-58-3
Cycle3	CCTTCCCATGA	ATGGGAAGGAC	CC(C)NC(=O)CN1C=C(C2=CC=CC=C21)C=O	708284-70-2
Cycle3	ACCTTACGCGA	GCGTAAGGTAC	CC(C)C1=CC=C(C=C1)N2C=C(C=N2)C=O	1015845-83-6
Cycle3	AACACCAGCGA	GCTGGTGTTAC	COC1=C(C=C(C=C1)C=O)CN2CCCC2	128501-84-8
Cycle3	GTTCTTCCGGA	CGGAAGAACAC	C1=CN(C(=C1)C=O)CC2=CC=CO2	13788-32-4
Cycle3	CACTCATGGGA	CCATGAGTGAC	CC1=NC=C(C=N1)C=O	90905-33-2
Cycle3	ACAAACCCGGA	CGGGTTTGTAC	CN1C=C(C2=C1C=CC(=C2)Br)C=O	10102-94-0
Cycle3	CAGCTGAACGA	GTTCAGCTGAC	C1=CC=C(C(=C1)C=O)C2=CC(=CC=C2)C(=O)O	205871-52-9
Cycle3	ATGCTCTGGGA	CCAGAGCATAC	C1CCC(CC1)CC=O	5664-21-1
Cycle3	AGACTCACGGA	CGTGAGTCTAC	CC1=NN(C(=C1C=O)Cl)C2=CC=CC=C2	947-95-5
Cycle3	CACAGACTCGA	GAGTCTGTGAC	C1CC(C1)C=O	2987-17-9
Cycle3	AACCTGACCGA	GGTCAGGTTAC	C1COCC1C=O	79710-86-4
Cycle3	ATCCGGTTGGA	CAACCGGATAC	C1=CN=C(C(=C1Cl)C=O)Cl	134031-24-6
Cycle3	ATCGCTTCGGA	CGAAGCGATAC	C1=CN=C(N=C1)SC2=CC=C(O2)C=O	57603-82-4
Cycle3	ACTTCGCTCGA	GAGCGAAGTAC	C1=CC=C(C=C1)CCC=O	104-53-0
Cycle3	CTCATAGGCGA	GCCTATGAGAC	C1=CC=C(C(=C1)C=O)S(=O)(=O)[O-].[Na+]	1008-72-6
Cycle3	GATCGGAGAGA	TCTCCGATCAC	CSCCC=O	3268-49-3
Cycle3	GGGAACAGTGA	ACTGTTCCCAC	CS(=O)(=O)C1=CC=C(C=C1)C=O	5398-77-6
Cycle3	GGTCGTTACGA	GTAACGACCAC	C1COC2=C(O1)C=CC(=C2)C=O	29668-44-8
Cycle3	CGTTGCCTAGA	TAGGCAACGAC	C1CC(CC=C1)C=O	100-50-5
Cycle3	CTGCAGTCAGA	TGACTGCAGAC	C1=CC(=CC=C1C=O)C(=O)O	619-66-9
Cycle3	CACATCCGAGA	TCGGATGTGAC	C1=C(NC=N1)C=O	3034-50-2
Cycle3	ACGAGAAGGGA	CCTTCTCGTAC	C1=CSC(=C1)C=O	98-03-3
Cycle3	CCCGAATGAGA	TCATTCGGGAC	C1=CC=C2C(=C1)C(=CN2)C=O	487-89-8
Cycle3	CTCTGTCTCGA	GAGACAGAGAC	C1C2CC(C1C=C2)C=O	5453-80-5
Cycle3	CCGAAAGAGGA	CTCTTTCGGAC	CC(C)CC=O	590-86-3
Cycle3	TAGCACAGGGA	CCTGTGCTAAC	C1=CSC(=C1)C2=CC=C(S2)C=O	3779-27-9
Cycle3	GAATCGTCGGA	CGACGATTCAC	C1=CC=C(C=C1)COC2=CC=CC(=C2)C=O	1700-37-4
Cycle3	CGCATGAGTGA	ACTCATGCGAC	C1=CC=C2C(=C1)C=CC(=N2)C=O	5470-96-2
Cycle3	CTGCGATGAGA	TCATCGCAGAC	CC(=O)OCC1=CC=C(O1)C=O	10551-58-3
Cycle3	CTGACAGCTGA	AGCTGTCAGAC	CC(C)(C)OC(=O)N1CCCC(C1)C=O	118156-93-7
Cycle3	CCGCTAGTAGA	TACTAGCGGAC	CC(=O)C=O	78-98-8
Cycle3	AGTATCCGGGA	CCGGATACTAC	CC=NO	107-29-9
Cycle3	ACGTTGGTCGA	GACCAACGTAC	C1COCCN1C2=CC=C(C=C2)C=O	1204-86-0
Cycle3	AGATCAGGGGA	CCCTGATCTAC	C1=CC(=C(C(=C1)F)F)C=O	2646-91-5
Cycle3	GGGTGGAAAGA	TTTCCACCCAC	CCC=CC=CC=O	4313-03-5
Cycle3	CACCAGCTTGA	AAGCTGGTGAC	C1=CC(=C2C=CNC2=C1)C=O	1074-86-8
Cycle3	GATATCCGCGA	GCGGATATCAC	C1=CN=C(N1)C=O	10111-08-7
Cycle3	TTCGGAGTGGA	CACTCCGAAAC	CCC(C)C=O	96-17-3
Cycle3	ACGGAAGAGGA	CTCTTCCGTAC	CCC=CC=O	1576-87-0
Cycle3	GATTCGCGAGA	TCGCGAATCAC	C1=CC2=C(C=CN2)C=C1C=O	1196-69-6
Cycle3	GCAGAGAACGA	GTTCTCTGCAC	C1=CC=C(C=C1)CC=O	122-78-1
Cycle3	GGGTTGTTGGA	CAACAACCCAC	C1=CC=C2C(=C1)C=C(S2)C=O	3541-37-5
Cycle3	CCGCAGATAGA	TATCTGCGGAC	C1=CC2=C(C=CN=C2)C(=C1)C=O	80278-67-7
Cycle3	AGGGGCAATGA	ATTGCCCCTAC	C1=CC=C(C(=C1)C=O)[N+](=O)[O-]	552-89-6
Cycle3	CGGAGTAGAGA	TCTACTCCGAC	C1=CC=C2C(=C1)C=C(C=N2)C=O	13669-42-6
Cycle3	AGGACGGTAGA	TACCGTCCTAC	C1=CC=C2C(=C1)C(=O)C(=CO2)C=O	17422-74-1
Cycle3	GTAGGAACGGA	CGTTCCTACAC	C(C(C=O)O)O	56-82-6
Cycle3	GCCCGTTATGA	ATAACGGGCAC	C(C(F)(F)F)(O)O	421-53-4
Cycle3	CAGCGTAAGGA	CTTACGCTGAC	CC(CC1=CC2=C(C=C1)OCO2)C=O	1205-17-0
Cycle3	TCCGATGACGA	GTCATCGGAAC	CC1=C(C(=NN1C)C)C=O	2644-93-1
Cycle3	ACAGGAGCAGA	TGCTCCTGTAC	C1CCC(C1)C=O	872-53-7
Cycle3	AGATCCCCTGA	AGGGGATCTAC	C1=C(SC=N1)C=O	1003-32-3
Cycle3	ACACTCCAGGA	CTGGAGTGTAC	C1=CC=C2C(=C1)C=C(O2)C=O	4265-16-1
Cycle3	TCTGCCGTAGA	TACGGCAGAAC	C1=CC=C2C(=C1)C(=CN2CC(=O)O)C=O	138423-98-0
Cycle3	GTCCTTGCTGA	AGCAAGGACAC	CC(C)C1=CC2=C(C=C1)OC=C(C2=O)C=O	49619-58-1
Cycle3	ATTCGTCCCGA	GGGACGAATAC	CC1=C(C=C2C(=C1)OC=C(C2=O)C=O)Cl	64481-12-5
Cycle3	GGTTGAGTGGA	CACTCAACCAC	CCCCC=CC=O	18829-55-5
Cycle3	AAGTGGCACGA	GTGCCACTTAC	C1=CC=C(C=C1)CC(C(=O)O)NC=O	4289-95-6
Cycle3	GTTGCACACGA	GTGTGCAACAC	C1=CC=C2C(=C1)C(=O)C(=C(O2)N)C=O	61424-76-8
Cycle3	AGAGCTGCTGA	AGCAGCTCTAC	CCC=CCCC=O	6728-31-0
Cycle3	ACAACTCGCGA	GCGAGTTGTAC	C1=CC=C2C(=C1)C(=O)N(C2=O)CC=O	2913-97-5
Cycle3	ACACGACGTGA	ACGTCGTGTAC	C1CS(=O)(=O)CCN1C2=CC=C(C=C2)C=O	27913-96-8
Cycle3	CACCGTCTAGA	TAGACGGTGAC	CC(C)(CCC=O)[N+](=O)[O-]	57620-49-2
Cycle3	GCGTTAGAGGA	CTCTAACGCAC	C1=CNC(=C1)C=O	1003-29-8
Cycle3	AAGAGCGCTGA	AGCGCTCTTAC	C1=CC=C2C(=C1)C(=CC=N2)C=O	4363-93-3
Cycle3	GTTCGCAAGGA	CTTGCGAACAC	CN1C=CC=C1C=O	1192-58-1
Cycle3	GAGATGCCTGA	AGGCATCTCAC	CC(=C)C=O	78-85-3
Cycle3	ttccgtgctGA	agcacggaaAC	OC(=O)C1(CCC1)C2=CC=CC=C2	37828-19-6
Cycle3	agacaggagGA	ctcctgtctAC	OC(=O)CC1=CC=C(F)C=C1	405-50-5
Cycle3	cccattgtaGA	tacaatgggAC	OC(=O)C1CC1	1759-53-1
Cycle3	gtacgactcGA	gagtcgtacAC	OC(=O)C1(CCC1)C(O)=O	5445-51-2
Cycle3	tcgctaaccGA	ggttagcgaAC	OC(=O)C1CCC1	3721-95-7
Cycle3	gtagatcggGA	ccgatctacAC	Cl.OC(=O)CC1=CC=CN=C1	6419-36-9
Cycle3	tgggggttaGA	taacccccaAC	OC(=O)CC1=CC=C(C=C1)[N+]([O-])=O	104-03-0
Cycle3	atcaccacaGA	tgtggtgatAC	OC(=O)CC1=CC=C(C=C1)C(F)(F)F	32857-62-8
Cycle3	gctctatacGA	gtatagagcAC	OC(=O)C1CCC(CC1)C(O)=O	1076-97-7
Cycle3	acttccacaGA	tgtggaagtAC	OC(=O)CC1(CCCCC1)CC(O)=O	4355-11-7
Cycle3	ggtccaaagGA	ctttggaccAC	NC1=CC(=CC=C1C(O)=O)[N+]([O-])=O	619-17-0
Cycle3	gctcactacGA	gtagtgagcAC	OC(=O)C1CCCO1	16874-33-2
Cycle3	tatcgggtaGA	tacccgataAC	OC(=O)C1CCC(=O)N1	4042-36-8
Cycle3	gtcagactaGA	tagtctgacAC	OC(=O)CC1=C(Cl)C=CC=C1Cl	6575-24-2
Cycle3	acttcacacGA	gtgtgaagtAC	COC1=CC=C(CC(O)=O)C=C1O	1131-94-8
Cycle3	atcgcacttGA	aagtgcgatAC	OC(C(O)C(O)=O)C(O)=O	147-71-7
Cycle3	tggcccaatGA	attgggccaAC	OC(=O)C=CC1=CC=CC=C1	140-10-3
Cycle3	actccgtttGA	aaacggagtAC	C[S](=O)(=O)CC(O)=O	2516-97-4
Cycle3	cagaatgcgGA	cgcattctgAC	OC(=O)C[N]1C=CN=C1	22884-10-2
Cycle3	tctagcaggGA	cctgctagaAC	Cl.OC(=O)CC1=NC=CC=C1	16179-97-8
Cycle3	acagcctcaGA	tgaggctgtAC	OC(=O)C1CCC(=O)N1	98-79-3
Cycle3	aacgcccttGA	aagggcgttAC	OC(=O)CC1=CC=C(Cl)C=C1	1878-66-6
Cycle3	tcgtcttgaGA	tcaagacgaAC	OC(=O)C1COC2=CC=CC=C2O1	3663-80-7
Cycle3	actcgctaaGA	ttagcgagtAC	OC(=O)CC1=C[NH]C2=C1C=CC=C2	87-51-4
Cycle3	tcgtctatgGA	catagacgaAC	Cl.OC(=O)CC1=CC=NC=C1	6622-91-9
Cycle3	acaagctccGA	ggagcttgtAC	OC(=O)CC1=C(Cl)C=C(Cl)C=C1	19719-28-9
Cycle3	cgattgcttGA	aagcaatcgAC	CCC(C)C(O)=O	116-53-0
Cycle3	taacgctggGA	ccagcgttaAC	OC(=O)C1CCOCC1	5337-03-1
Cycle3	cctattaggGA	cctaataggAC	OC(=O)C=CC1=CC=C(Cl)C=C1	1615-02-7
Cycle3	tcgcaggatGA	atcctgcgaAC	OC(=O)C=CC1=CC=C(C=C1)C(F)(F)F	16642-92-5
Cycle3	gtgcaagacGA	gtcttgcacAC	OC(=O)CCC1=CC=C(O)C=C1	501-97-3
Cycle3	ataacgtccGA	ggacgttatAC	OC(=O)C1CC=CC1	7686-77-3
Cycle3	ggggttacaGA	tgtaaccccAC	OC(=O)CC1=CC=C(O)C=C1	156-38-7
Cycle3	tacaatcccGA	gggattgtaAC	OC(=O)CC1=CC(=CC(=C1)F)F	105184-38-1
Cycle3	gatgaccttGA	aaggtcatcAC	OC(=O)CCCCCCC(O)=O	505-48-6
Cycle3	atgaacgctGA	agcgttcatAC	OC(=O)CCC(F)(F)F	406-93-9
Cycle3	catggtgacGA	gtcaccatgAC	OC(=O)CCC1=CC=CS1	5928-51-8
Cycle3	ctagcccaaGA	ttgggctagAC	OC(=O)CC1=C(F)C(=CC=C1)F	145689-41-4
Cycle3	acgtgagttGA	aactcacgtAC	OC(=O)C1CCC=CC1	4771-80-6
Cycle3	ggtctaaagGA	ctttagaccAC	CCC1CCC(CC1)C(O)=O	6833-47-2
Cycle3	ggatcacctGA	aggtgatccAC	CC(C)C1CCC(C)CC1OCC(O)=O	40248-63-3
Cycle3	atggaccctGA	agggtccatAC	OC(=O)CCCC1=CC=CS1	4653-11-6
Cycle3	gctttcaagGA	cttgaaagcAC	CC(C(O)=O)C(O)=O	516-05-2
Cycle3	tgatacgcaGA	tgcgtatcaAC	OC(=O)CCC1=CC=C(F)C=C1	459-31-4
Cycle3	gtgacatacGA	gtatgtcacAC	OC(=O)COC1CCCCC1	71995-54-5
Cycle3	cacatcgatGA	atcgatgtgAC	OC(=O)CCC(=O)C1=CC=C(Br)C=C1	6340-79-0
Cycle3	ccgcagttaGA	taactgcggAC	OC(=O)CC1=CC=C(C=C1)C#N	5462-71-5
Cycle3	tcatggcagGA	ctgccatgaAC	COC1=CC(=CC(=C1OC)OC)C=CC(O)=O	90-50-6
Cycle3	tattcgggtGA	acccgaataAC	OC(=O)COC1=CC(=CC=C1)Cl	588-32-9
Cycle3	tgctgggatGA	atcccagcaAC	OC(=O)C1CC(=O)C1	23761-23-1
Cycle3	gataactggGA	ccagttatcAC	OC(=O)C1=NNC(=O)CC1	27372-38-9
Cycle3	tccagagcaGA	tgctctggaAC	OC(=O)C=CC1=CC=C(O)C(=C1)O	331-39-5
Cycle3	tgacctgagGA	ctcaggtcaAC	OC(=O)C1CCC(=O)O1	21461-84-7
Cycle3	caaaggtctGA	agacctttgAC	OC(=O)CCCCC1CCSS1	1077-28-7
Cycle3	catcagcttGA	aagctgatgAC	OC(=O)C1CCC(CC1)C(O)=O	619-82-9
Cycle3	tgcgcacttGA	aagtgcgcaAC	OC(=O)C1(CC1)C2=CC=C(F)C=C2	773100-29-1
Cycle3	gtgctaagcGA	gcttagcacAC	OC(=O)C1(CC1)C2=CC(=CC=C2)Cl	124276-34-2
Cycle3	tcggctgttGA	aacagccgaAC	OC(=O)CC1=CC=CC(=C1)O	621-37-4
Cycle3	gtcggtaagGA	cttaccgacAC	OC(=O)C12CC3CC(CC(C3)C1)C2	828-51-3
Cycle3	gttactggaGA	tccagtaacAC	OC(=O)CCC1=CC=C(Br)C=C1	1643-30-7
Cycle3	atttgtgccGA	ggcacaaatAC	OC(=O)CCC1=NC=CC=C1	15197-75-8
Cycle3	atagaggcgGA	cgcctctatAC	OC(=O)C=CC1=CC(=CC=C1)[N+]([O-])=O	555-68-0
Cycle3	agctgatctGA	agatcagctAC	COC1=CC=C(Cl)C=C1CC(O)=O	7569-62-2
Cycle3	caacattggGA	ccaatgttgAC	CC(C)(C)C1=CC=C(CC(O)=O)C=C1	32857-63-9
Cycle3	atcgggtgaGA	tcacccgatAC	OC(=O)C=CC1=CC(=CC=C1)C(F)(F)F	779-89-5
Cycle3	ggagtcttaGA	taagactccAC	OC(=O)C12CC3CC(C1)CC(C3)(C2)C(O)=O	39269-10-8
Cycle3	atagacacgGA	cgtgtctatAC	OC(=O)C1CC=CCC1C(O)=O	2305-26-2
Cycle3	accagggaaGA	ttccctggtAC	OC(=O)C1(CC1)C(O)=O	598-10-7
Cycle3	tgtgtccaaGA	ttggacacaAC	OC(=O)CCC1=C[NH]C2=CC=CC=C12	830-96-6
Cycle3	tgtgtcgatGA	atcgacacaAC	OC(=O)CC1=CC=C(O)C(=C1)O	102-32-9
Cycle3	aggagcttaGA	taagctcctAC	CN(C)C1=CC=C(C=CC(O)=O)C=C1	1552-96-1
Cycle3	gagtggatcGA	gatccactcAC	OC(=O)CCC1=CC=CC=C1F	1643-26-1
Cycle3	aggaatcctGA	aggattcctAC	OC(=O)C1CCCO1	87392-07-2
Cycle3	ccctttcacGA	gtgaaagggAC	COC1=CC=C(CC(O)=O)C=C1F	452-14-2
Cycle3	agagttggcGA	gccaactctAC	CC(C)(C(O)=O)C(O)=O	595-46-0
Cycle3	aagcttcagGA	ctgaagcttAC	OC(=O)CC1=CC(=CC=C1)C(F)(F)F	351-35-9
Cycle3	agcaagcatGA	atgcttgctAC	OC(=O)CCC1=CC=CC(=C1)[N+]([O-])=O	1664-57-9
Cycle3	tcggtctcaGA	tgagaccgaAC	OC(C(O)=O)C1=CC=C(F)C=C1	395-33-5
Cycle3	tgcggcaatGA	attgccgcaAC	OC(=O)CC1=CC=C(I)C=C1	1798-06-7
Cycle3	ctaagcaggGA	cctgcttagAC	OC(=O)CCC1=CC=CC(=C1)Cl	21640-48-2
Cycle3	gcaaaccatGA	atggtttgcAC	OC(=O)C12CC3CC(CC(O)(C3)C1)C2	42711-75-1
Cycle3	ggtaatctcGA	gagattaccAC	OC(=O)CC1=CC(=CC=C1Br)Cl	81682-38-4
Cycle3	agactgtgcGA	gcacagtctAC	OC(=O)CCC1=CC=CC(=C1)C(F)(F)F	585-50-2
Cycle3	gcagttcttGA	aagaactgcAC	Cl.NCC(=O)CCC(O)=O	5451-09-2
Cycle3	gtatggtcaGA	tgaccatacAC	OC(=O)C1CCC(F)(F)CC1	122665-97-8
Cycle3	agtagggacGA	gtccctactAC	OC(=O)CC1=CC=C(Br)C=C1F	114897-92-6
Cycle3	tatccgacgGA	cgtcggataAC	OC(=O)CSC(C1=CC=CC=C1)C2=CC=CC=C2	63547-22-8
Cycle3	acacgcactGA	agtgcgtgtAC	OC(=O)CC1=CC=C2OCCC2=C1	69999-16-2
Cycle3	gaggtgatgGA	catcacctcAC	COC1=CC(=CC(=C1O)OC)C=CC(O)=O	530-59-6
Cycle3	ttacctgccGA	ggcaggtaaAC	OC(=O)C1CCC(=O)CC1	874-61-3
Cycle3	tccattcacGA	gtgaatggaAC	CC(C)(C)OC(=O)CC(O)=O	40052-13-9
Cycle3	tcagcttccGA	ggaagctgaAC	OC(=O)CC1=CC=C(F)C(=C1)Br	194019-11-9
Cycle3	ccaacctacGA	gtaggttggAC	CC(C)(C)OC(=O)NC1CCC(CC1)C(O)=O	53292-89-0
Cycle3	ttctccggaGA	tccggagaaAC	CC(C(O)=O)C1=CC=CC=C1	7782-26-5
Cycle3	ttgacaacgGA	cgttgtcaaAC	OC(=O)C=CC1=CC=C(O)C=C1	501-98-4
Cycle3	actcgtacaGA	tgtacgagtAC	OC(=O)CC1=CC=C(F)C=C1Br	61150-59-2
Cycle3	ccatcgagaGA	tctcgatggAC	Cl.NC1=CC(=CC(=C1)O)C(O)=O	14206-69-0
Cycle3	tctgacctgGA	caggtcagaAC	OC(=O)C1=CC=C(Cl)S1	24065-33-6
Cycle3	aaactgcgaGA	tcgcagtttAC	NC1=C(C=CC=N1)C(O)=O	5345-47-1
Cycle3	aatgtcaccGA	ggtgacattAC	OC(=O)C1=CC=C(N=C1)C(F)(F)F	231291-22-8
Cycle3	tcggcttaaGA	ttaagccgaAC	OC(=O)CC1=CC=CS1	1918-77-0
Cycle3	ttccacaggGA	cctgtggaaAC	OC(=O)C1=CC=CC=C1I	88-67-5
Cycle3	gagggtgttGA	aacaccctcAC	OC(=O)C1=CC=C(C=C1Cl)[N+]([O-])=O	99-60-5
Cycle3	gagatacagGA	ctgtatctcAC	NC1=CC=C(Br)C=C1C(O)=O	5794-88-7
Cycle3	cgagataagGA	cttatctcgAC	COC1=CC(=CC=C1O)C(O)=O	121-34-6
Cycle3	gccgattgaGA	tcaatcggcAC	OC(=O)C1=CC(=CC=C1Cl)Br	21739-92-4
Cycle3	tgattcgtcGA	gacgaatcaAC	OC(=O)C1=CC=CC(=C1)Br	585-76-2
Cycle3	gtgaatgcgGA	cgcattcacAC	CN(C)C1=CC(=CC=C1)C(O)=O	99-64-9
Cycle3	agagagcgaGA	tcgctctctAC	OC(=O)C1=CC=CC(=C1)O	99-06-9
Cycle3	agcaggtagGA	ctacctgctAC	OC(=O)C1=CN=CC(=C1)Br	20826-04-4
Cycle3	tgcgaacatGA	atgttcgcaAC	COC1=CC=C(C=C1O)C(O)=O	645-08-9
Cycle3	cccaagtcaGA	tgacttgggAC	OC(=O)C1=CSC=C1	88-13-1
Cycle3	gtattacgcGA	gcgtaatacAC	NC1=CC=C(C=C1N)C(O)=O	619-05-6
Cycle3	gttcatccaGA	tggatgaacAC	OC(=O)C1=CN=C(Cl)C=C1	5326-23-8
Cycle3	tgcctacgaGA	tcgtaggcaAC	OC(=O)C1=C(Cl)N=CC=C1	2942-59-8
Cycle3	ttcaccaccGA	ggtggtgaaAC	CC1=CC=C(S1)C(O)=O	1918-79-2
Cycle3	tactctccgGA	cggagagtaAC	NC1=CC(=CC=C1)C(O)=O	99-05-8
Cycle3	ccaagcttcGA	gaagcttggAC	OC(=O)C1=CC=C(Br)C=C1[N+]([O-])=O	99277-71-1
Cycle3	catgggataGA	tatcccatgAC	C[N]1N=C(C(O)=O)C2=C1C=CC=C2	50890-83-0
Cycle3	attctcgctGA	agcgagaatAC	OC(=O)C1=CC=C(C=C1O)C(F)(F)F	328-90-5
Cycle3	taatcagcgGA	cgctgattaAC	COC1=CC=C(C(=C1)C(O)=O)[N+]([O-])=O	1882-69-5
Cycle3	taagggaagGA	cttcccttaAC	COC1=CC(=CC=C1)C(O)=O	586-38-9
Cycle3	ttcttcgcgGA	cgcgaagaaAC	OC(=O)C1=CC=CC=C1C(F)(F)F	433-97-6
Cycle3	ggacagatgGA	catctgtccAC	OC(=O)C1=CC=CC(=C1)C(F)(F)F	454-92-2
Cycle3	ctgacactgGA	cagtgtcagAC	CC1=C(C=CC=C1C(O)=O)[N+]([O-])=O	1975-50-4
Cycle3	cttaagcacGA	gtgcttaagAC	OC(=O)C1=NC2=CC=CC=C2N=C1	879-65-2
Cycle3	ttgcttcagGA	ctgaagcaaAC	OC(=O)C1=N[NH]C=C1[N+]([O-])=O	5334-40-7
Cycle3	gaaaaggctGA	agccttttcAC	OC(=O)C1=N[NH]C=C1Br	13745-17-0
Cycle3	cgaaagagcGA	gctctttcgAC	CCC1=CC=C(C=C1)C(O)=O	619-64-7
Cycle3	cgtccattgGA	caatggacgAC	CC1=CC=C(C(=C1)C)C(O)=O	611-01-8
Cycle3	actgcaaagGA	ctttgcagtAC	OC(=O)C1=C(Cl)C=CC=C1Cl	50-30-6
Cycle3	gctgtcttcGA	gaagacagcAC	OC(=O)C1=CN=C(Cl)C(=C1)Br	29241-62-1
Cycle3	cctccacttGA	aagtggaggAC	OC(=O)C1=C(Cl)N=CC(=C1)Br	29241-65-4
Cycle3	cttgaacccGA	gggttcaagAC	COC1=C(C=C(N)C(=C1)C(O)=O)[N+]([O-])=O	196194-99-7
Cycle3	tcttcttcgGA	cgaagaagaAC	CC1=CC=C(Cl)C=C1C(O)=O	7499-06-1
Cycle3	atacgagggGA	ccctcgtatAC	OC(=O)C1=CC=C(C(=C1)[N+]([O-])=O)[N+]([O-])=O	528-45-0
Cycle3	gcggataagGA	cttatccgcAC	OC(=O)C1=C(C=CC=C1F)[N+]([O-])=O	385-02-4
Cycle3	gactacgcaGA	tgcgtagtcAC	CC1=CC=C(C=C1I)C(O)=O	82998-57-0
Cycle3	ccacccattGA	aatgggtggAC	OC(=O)C1=CC=C(S1)C2=CC=CC=C2	19163-24-7
Cycle3	gatcgtatgGA	catacgatcAC	CN1CCN(CC1)C2=CC(=CC=C2)C(O)=O	215309-01-6
Cycle3	gtgcaaatgGA	catttgcacAC	NC1=CN=C(C=N1)C(O)=O	40155-43-9
Cycle3	agtaggcctGA	aggcctactAC	OC(=O)C1=NC=CC(=C1)Br	30766-03-1
Cycle3	ttctacggaGA	tccgtagaaAC	OC(=O)C1=CN=C(Br)C=C1	6311-35-9
Cycle3	actacatgcGA	gcatgtagtAC	NC1=CC(=CC=C1O)C(O)=O	1571-72-8
Cycle3	ggagcctttGA	aaaggctccAC	NC1=CC=C(O)C(=C1)C(O)=O	89-57-6
Cycle3	actgaaagcGA	gctttcagtAC	COC(=O)C1=CC=CC(=C1)C(O)=O	1877-71-0
Cycle3	aagtcgcgtGA	acgcgacttAC	OC(=O)C1=CC=CC(=C1Cl)[N+]([O-])=O	3970-35-2
Cycle3	ccccaaagaGA	tctttggggAC	OC(=O)C1=CC=CC(=C1F)Br	161957-56-8
Cycle3	gtccatcttGA	aagatggacAC	OC(=O)C1=CC=CN=C1C(O)=O	89-00-9
Cycle3	agtgattccGA	ggaatcactAC	OC(=O)C1=CC=CC=C1N2CCOCC2	42106-48-9
Cycle3	ggcataagcGA	gcttatgccAC	OC(=O)C1=CC=CC=C1[N]2C=CC=N2	55317-53-8
Cycle3	atgtcctagGA	ctaggacatAC	OC(=O)C1=CC=C(C=C1)N2CCOCC2	7470-38-4
Cycle3	gaacagtctGA	agactgttcAC	OC(=O)C1=CC=CC(=C1)N2CCCC2	72548-79-9
Cycle3	cgactattgGA	caatagtcgAC	OC(=O)C1=CC=CC=C1N2CCCC2	78648-27-8
Cycle3	cgccgtttaGA	taaacggcgAC	CC1=CC=C(C=C1O)C(O)=O	586-30-1
Cycle3	accaacgctGA	agcgttggtAC	OC1=CC(=CN=C1)C(O)=O	27828-71-3
Cycle3	ggatataggGA	cctatatccAC	OC(=O)C1=CC(=CN=C1)C(O)=O	499-81-0
Cycle3	taaacggccGA	ggccgtttaAC	OC(=O)C1=CC=CC(=C1Br)F	132715-69-6
Cycle3	tccaacacaGA	tgtgttggaAC	CCOC1=CC=CC=C1C(O)=O	134-11-2
Cycle3	gacagagaaGA	ttctctgtcAC	C[N]1C=C(C(O)=O)C2=C1C=CC=C2	32387-21-6
Cycle3	gacgaagacGA	gtcttcgtcAC	COC1=C(OC)C(=CC(=C1)C(O)=O)OC	118-41-2
Cycle3	gcacgtacaGA	tgtacgtgcAC	CC1=CN=C(C=N1)C(O)=O	5521-55-1
Cycle3	aaccaaccaGA	tggttggttAC	OC(=O)C1=N[NH]C2=C1C=CC=C2	4498-67-3
Cycle3	gctactcgaGA	tcgagtagcAC	NC1=CC=CC(=C1C(O)=O)[N+]([O-])=O	50573-74-5
Cycle3	ccagcgttaGA	taacgctggAC	OC(=O)C1=C(N=CC=C1)N2CCOCC2	423768-54-1
Cycle3	gagacctcaGA	tgaggtctcAC	OC(=O)C1=NC=CC(=C1)Cl	5470-22-4
Cycle3	cgtatccttGA	aaggatacgAC	OC(=O)C1=CC(=NC=C1)Cl	6313-54-8
Cycle3	ctgatggcaGA	tgccatcagAC	CC1(C)OB(OC1(C)C)C2=CC=CC(=C2)C(O)=O	269409-73-6
Cycle3	ccaacaatcGA	gattgttggAC	OB(O)C1=CC=CC(=C1)C(O)=O	25487-66-5
Cycle3	cttagcacaGA	tgtgctaagAC	OC(=O)C1=C(F)C=CC=C1F	385-00-2
Cycle3	ggtggtataGA	tataccaccAC	OC(=O)C1=C(O)C=CC(=C1)C=O	616-76-2
Cycle3	cggaaaggtGA	acctttccgAC	CC1=C(C=NO1)C(O)=O	42831-50-5
Cycle3	cgattccatGA	atggaatcgAC	CC1=C(C=CC(=C1)N)C(O)=O	2486-75-1
Cycle3	gcaggttgtGA	acaacctgcAC	NC1=CN=CC=C1C(O)=O	7579-20-6
Cycle3	ctaccgacaGA	tgtcggtagAC	CSC1=NC=C(Br)C(=N1)C(O)=O	50593-92-5
Cycle3	ccgtctatcGA	gatagacggAC	OC(=O)C1=CC=C(C(=C1)F)[N+]([O-])=O	403-21-4
Cycle3	aactgctgcGA	gcagcagttAC	NC1=CC=C(C=C1[N+]([O-])=O)C(O)=O	1588-83-6
Cycle3	attcgtgtcGA	gacacgaatAC	CC1=CC=C(C=C1Cl)C(O)=O	5162-82-3
Cycle3	ggcttatctGA	agataagccAC	OC(=O)C1=CC(=CC(=C1)O)O	99-10-5
Cycle3	gttgactacGA	gtagtcaacAC	OC(=O)C1=NC=C(Br)C=N1	37131-87-6
Cycle3	ttggtcgacGA	gtcgaccaaAC	OC(=O)C1=CC=CC(=C1O)O	303-38-8
Cycle3	aaacggaccGA	ggtccgtttAC	COC1=CC=C(O)C(=C1)C(O)=O	2612-02-4
Cycle3	aacatcagcGA	gctgatgttAC	OC(=O)C1=CC=NC(=C1)N2CCOCC2	295349-64-3
Cycle3	cctagatgaGA	tcatctaggAC	OC(=O)C1=NC=C(C=C1)[N+]([O-])=O	30651-24-2
Cycle3	cgacaaacaGA	tgtttgtcgAC	OC(=O)C1=CC=C(CBr)C=C1	6232-88-8
Cycle3	ctcaaagggGA	ccctttgagAC	CC1=CC=C(C=C1[N+]([O-])=O)C(O)=O	96-98-0
Cycle3	agaaggttcGA	gaaccttctAC	OC(=O)C1=CC=C2OC=CC2=C1	90721-27-0
Cycle3	agagtggttGA	aaccactctAC	CC1=CC(=C(C)C=C1)C(O)=O	610-72-0
Cycle3	gacaggtaaGA	ttacctgtcAC	OCC1=CC=C(C=C1)C(O)=O	3006-96-0
Cycle3	tccggcaatGA	attgccggaAC	CC1=CC=C(C=C1)C(O)=O	99-94-5
Cycle3	tcttctcccGA	gggagaagaAC	C[N]1C=NC(=C1)C(O)=O	41716-18-1
Cycle3	ccatgagcaGA	tgctcatggAC	OC(=O)C1=C(C=CC=C1)C2=CC=CC=C2	947-84-2
Cycle3	gtgaatcgtGA	acgattcacAC	CC1=CC=CC(=C1C(O)=O)[N+]([O-])=O	13506-76-8
Cycle3	cggtttctaGA	tagaaaccgAC	NC1=NC=C(S1)C(O)=O	40283-46-3
Cycle3	tgcaacaccGA	ggtgttgcaAC	OC(=O)C1=C(F)C=C(F)C=C1	1583-58-0
Cycle3	ctgagaggaGA	tcctctcagAC	CC1=CC(=CC=C1[N+]([O-])=O)C(O)=O	3113-71-1
Cycle3	cttacgaggGA	cctcgtaagAC	OC(=O)C1=C2C=N[NH]C2=CC=C1	677306-38-6
Cycle3	ctgatcctcGA	gaggatcagAC	OC(=O)C1=CC=C(C(=C1)C(O)=O)[N+]([O-])=O	4315-09-7
Cycle3	ataccaacgGA	cgttggtatAC	OC(=O)C1=CC=C2C=C[NH]C2=C1	1670-82-2
Cycle3	aggctatagGA	ctatagcctAC	NC1=NC=C(C=C1)C(O)=O	3167-49-5
Cycle3	tagtactggGA	ccagtactaAC	OC(=O)C1=NC=CC=N1	31519-62-7
Cycle3	attcagctcGA	gagctgaatAC	OC(=O)C1=C[NH]C2=C1C=CC=C2	771-50-6
Cycle3	gtttcagctGA	agctgaaacAC	OC(=O)C1=CC=C(Br)C2=C1C=CC=C2	16650-55-8
Cycle3	tcccgtactGA	agtacgggaAC	CC1=CC=CC(=N1)C(O)=O	934-60-1
Cycle3	actggccatGA	atggccagtAC	OC(=O)C1=CN=C(OC2=CC=CC=C2)C=C1	51362-38-0
Cycle3	tagatggtgGA	caccatctaAC	CC1=C(C(O)=O)C(=N[NH]1)C	113808-86-9
Cycle3	tatgctgccGA	ggcagcataAC	OC(=O)C1=CC=NC=C1C(O)=O	490-11-9
Cycle3	gataggatcGA	gatcctatcAC	OC(=O)C1=C(Cl)C=C(Cl)N=C1Cl	69422-72-6
Cycle3	gggaattgtGA	acaattcccAC	CC1=C(C(O)=O)C(=NC(=C1)Cl)Cl	62774-90-7
Cycle3	cctatcatcGA	gatgataggAC	OC(=O)C1=CN=C(O)C=C1	5006-66-6
Cycle3	cagtaagtgGA	cacttactgAC	CC1=CC=C(C(O)=O)C(=C1)F	7697-23-6
Cycle3	tcttctgacGA	gtcagaagaAC	OC(=O)C1=C(F)N=CC=C1	393-55-5
Cycle3	ctgcaactaGA	tagttgcagAC	OC(=O)C1=C(F)C=CC=C1Br	2252-37-1
Cycle3	ttttctccgGA	cggagaaaaAC	OC(=O)C1=CN=C(F)C=C1	403-45-2
Cycle3	cctattccaGA	tggaataggAC	OC(=O)C1=NC(=CC=C1)Br	21190-87-4
Cycle3	aaggatcggGA	ccgatccttAC	OC(=O)C1=C(O)C=C(Br)C=C1	1666-28-0
Cycle3	tcgtaagcgGA	cgcttacgaAC	CC1=CC(=CC=C1C(O)=O)Br	68837-59-2
Cycle3	cttcgtagcGA	gctacgaagAC	CC1=CC(=CN=C1)C(O)=O	3222-49-9
Cycle3	tgtgaaggcGA	gccttcacaAC	OC(=O)C1=CC(=CC(=C1)Cl)[N+]([O-])=O	34662-36-7
Cycle3	tttccgaagGA	cttcggaaaAC	CC1=C(Br)C=CC=C1C(O)=O	76006-33-2
Cycle3	agggttagcGA	gctaaccctAC	OC(=O)C1=CC=C(Cl)C(=C1)[N+]([O-])=O	96-99-1
Cycle3	tgaaccgtcGA	gacggttcaAC	OC(=O)C1=C[NH]C=C1	931-03-3
Cycle3	aacaggctgGA	cagcctgttAC	OC(=O)C1=CC2=C(OCO2)C=C1	94-53-1
Cycle3	ctcaagcgaGA	tcgcttgagAC	CC1=CC(=CC=C1C(O)=O)[N+]([O-])=O	1975-51-5
Cycle3	cagcaatagGA	ctattgctgAC	OC1=CC=C(C(=C1)C(O)=O)[N+]([O-])=O	610-37-7
Cycle3	actagtgtcGA	gacactagtAC	CC1=C(C)C(=CC=C1)C(O)=O	603-79-2
Cycle3	gtggtagagGA	ctctaccacAC	CC1=C(C=C(F)C=C1)C(O)=O	33184-16-6
Cycle3	gcaagcagaGA	tctgcttgcAC	NC1=CC(=C(F)C=C1C(O)=O)F	83506-93-8
Cycle3	gaacatcagGA	ctgatgttcAC	NC1=C(C=C(F)C=C1)C(O)=O	446-08-2
Cycle3	tgtgcatgcGA	gcatgcacaAC	OC(=O)C1=CC=C(Cl)C(=C1)F	403-17-8
Cycle3	gccaggttaGA	taacctggcAC	OC(=O)C1=CC(=C(Cl)C=C1F)[N+]([O-])=O	35112-05-1
Cycle3	ttgtcctgtGA	acaggacaaAC	OC(=O)C1=CC=CC(=C1[N+]([O-])=O)O	602-00-6
Cycle3	aggttctccGA	ggagaacctAC	OC(=O)C1=CC=CC(=C1[N+]([O-])=O)Cl	4771-47-5
Cycle3	aggaatcgaGA	tcgattcctAC	COC(=O)C1=CC=CC(=C1O)[N+]([O-])=O	22621-41-6
Cycle3	tcgtagagaGA	tctctacgaAC	OC(=O)C1=NC=CC(=C1)[N+]([O-])=O	13509-19-8
Cycle3	tggttgtccGA	ggacaaccaAC	CCCOC1=C(C=CC=C1)C(O)=O	2100-31-4
Cycle3	cggatttccGA	ggaaatccgAC	CC1=CC=C(C=C1C(O)=O)[N+]([O-])=O	1975-52-6
Cycle3	aggtgatacGA	gtatcacctAC	CC1=C(Br)C(=CC=C1)C(O)=O	53663-39-1
Cycle3	agaaagcgtGA	acgctttctAC	OC(=O)C1=CC=C(F)C(=C1)Cl	403-16-7
Cycle3	tcggataggGA	cctatccgaAC	OC(=O)C1=CC=C2OCCOC2=C1	4442-54-0
Cycle3	gacgtcataGA	tatgacgtcAC	CC1=CC=CN=C1C(O)=O	4021-07-2
Cycle3	ctactggagGA	ctccagtagAC	NC1=CN=CC(=C1)C(O)=O	24242-19-1
Cycle3	gagatgaacGA	gttcatctcAC	NC1=C(N=CC=N1)C(O)=O	5424-01-1
Cycle3	cgtactgtgGA	cacagtacgAC	NC1=C(F)C=CC=C1C(O)=O	825-22-9
Cycle3	ggttatccgGA	cggataaccAC	CN1CCN(CC1)CC2=CC=C(C=C2)C(O)=O	106261-48-7
Cycle3	ggtgttctcGA	gagaacaccAC	NC1=C(C(O)=O)C(=CC=C1)F	434-76-4
Cycle3	tgggaagagGA	ctcttcccaAC	OC(=O)C1=CC(=C(F)C(=C1F)F)[N+]([O-])=O	197520-71-1
Cycle3	aaggatcctGA	aggatccttAC	NC1=CC(=CC(=C1)C(O)=O)C(O)=O	99-31-0
Cycle3	cttgagtgcGA	gcactcaagAC	OC(=O)C1=C(Cl)C=C(F)C=C1	2252-51-9
Cycle3	gcacacagaGA	tctgtgtgcAC	OC(=O)C1=CC=C(F)C(=C1)F	455-86-7
Cycle3	agatggcaaGA	ttgccatctAC	OC(=O)C1=CC(=CC(=C1)C(O)=O)F	1583-66-0
Cycle3	tcgtatctgGA	cagatacgaAC	CC1=CC(=CC(=C1)C(O)=O)C(O)=O	499-49-0
Cycle3	gttgttgccGA	ggcaacaacAC	CC1=CC=C(C(=C1)C(O)=O)[N+]([O-])=O	3113-72-2
Cycle3	tctcggcatGA	atgccgagaAC	OC(=O)C1=C(F)C=C(Cl)C=C1	446-30-0
Cycle3	tcctagtcaGA	tgactaggaAC	CC1=CC(=CC=C1N)C(O)=O	2486-70-6
Cycle3	cccgattctGA	agaatcgggAC	OC(=O)C1=N[NH]C2=C1C=C(F)C=C2	1077-96-9
Cycle3	catgaacagGA	ctgttcatgAC	OC(=O)C1=C[C](=O)C2=C(O1)C=CC=C2	4940-39-0
Cycle3	ccaccatgtGA	acatggtggAC	OC(=O)C1=C(O)C=CC=C1O	303-07-1
Cycle3	ccgatgcaaGA	ttgcatcggAC	OC(=O)C1=CC2=C(C=CC=C2)C=C1O	92-70-6
Cycle3	agtcaatccGA	ggattgactAC	COC1=C(C=CC(=C1)Cl)C(O)=O	57479-70-6
Cycle3	ctcgtaagaGA	tcttacgagAC	OC(=O)C1=NC(=CC=C1Cl)Cl	1702-17-6
Cycle3	gttctggcaGA	tgccagaacAC	OC(=O)C1=C(Cl)N=CC=C1Cl	262423-77-8
Cycle3	ggacgttttGA	aaaacgtccAC	OC(=O)C1=CC=CC(=C1F)O	91658-92-3
Cycle3	ctgtcggatGA	atccgacagAC	NC1=CC=NC=C1C(O)=O	7418-65-7
Cycle3	ggaatgactGA	agtcattccAC	COC1=CC(=CC(=C1)C(O)=O)OC	1132-21-4
Cycle3	gaacatgtcGA	gacatgttcAC	OC(=O)C1=CC=C(C(=C1)O)[N+]([O-])=O	619-14-7
Cycle3	gtctcactcGA	gagtgagacAC	COC1=CC(=CC=C1C)C(O)=O	7151-68-0
Cycle3	cctgttagcGA	gctaacaggAC	CC(C)C1=NC(=NO1)C2=CC=C(C=C2)C(O)=O	915920-28-4
Cycle3	tccgtttcgGA	cgaaacggaAC	OC(=O)C1=CC=CC(=C1)C#N	1877-72-1
Cycle3	gcaagtggaGA	tccacttgcAC	OC(=O)C(Br)C1=CC=CC=C1	4870-65-9
Cycle3	cctgtttgcGA	gcaaacaggAC	OC(=O)C1=C(C=CC=C1)C#N	3839-22-3
Cycle3	tgctgatcaGA	tgatcagcaAC	CSC1=NC=C(Cl)C(=N1)C(O)=O	61727-33-1
Cycle3	cctactgaaGA	ttcagtaggAC	CC1=NC(=CS1)C(O)=O	35272-15-2
Cycle3	acgtctggtGA	accagacgtAC	OC(=O)C1=CC=CC(=C1)CN2CCOCC2	67451-81-4
Cycle3	ctttgtgcgGA	cgcacaaagAC	NC1=C(C=C(C=C1)[N+]([O-])=O)C(O)=O	616-79-5
Cycle3	tgatccctaGA	tagggatcaAC	OC(=O)C1=CC(=CN=C1F)Br	29241-66-5
Cycle3	cagacccaaGA	ttgggtctgAC	CC1=CC(=CC=C1C(O)=O)F	321-21-1
Cycle3	gacgaacagGA	ctgttcgtcAC	CC1=NC=CN=C1C(O)=O	41110-28-5
Cycle3	cacgatagcGA	gctatcgtgAC	CC1=C(C)C(=C(C=C1)C(O)=O)N	50419-58-4
Cycle3	tgtctgagaGA	tctcagacaAC	OC(=O)C1=C(Br)SC=N1	103878-58-6
Cycle3	aagctcgtgGA	cacgagcttAC	COC1=CC(=C(C=C1)C(O)=O)OC	91-52-1
Cycle3	tcttaccacGA	gtggtaagaAC	COC1=NC=C(C=C1)C(O)=O	66572-55-2
Cycle3	tgttcgacaGA	tgtcgaacaAC	OC(=O)C1=CC(=CC(=C1)Br)Br	618-58-6
Cycle3	cacagaaagGA	ctttctgtgAC	C[S](=O)(=O)C1=CC(=C(C=C1)C(O)=O)F	142994-04-5
Cycle3	acttttggcGA	gccaaaagtAC	C[S](=O)(=O)C1=CC(=CC=C1F)C(O)=O	158608-00-5
Cycle3	cagtgaaagGA	ctttcactgAC	OC(=O)C1=CC(=CC(=C1)O)C(O)=O	618-83-7
Cycle3	tgtgtatggGA	ccatacacaAC	OC(=O)C1=CC(=C(O)N=C1)[N+]([O-])=O	6635-31-0
Cycle3	gatagtaccGA	ggtactatcAC	OC(=O)C1=NC=NC(=C1)O	6299-87-2
Cycle3	tagtcgcgtGA	acgcgactaAC	NC1=CC(=CC(=C1)CO)CO	71176-54-0
Cycle3	tcgtttaggGA	cctaaacgaAC	NC1=CC=C(CNC2CC2)C=C1	1082768-71-5
Cycle3	ttcatcgtgGA	cacgatgaaAC	NC1=NC=N[N]2C=CC=C12	159326-68-8
Cycle3	caaagaggtGA	acctctttgAC	COC(=O)C1=CC2=C(C=C[NH]2)C(=C1)N	121561-15-7
Cycle3	aggcatctcGA	gagatgcctAC	NC1=N[NH]C2=C1C=CC(=C2)F	404827-75-4
Cycle3	ggcacagtaGA	tactgtgccAC	NC1=CN=CC(=N1)C(O)=O	61442-38-4
Cycle3	ttccgtctcGA	gagacggaaAC	CN1CCN(CC1)CC2=CC(=CC=C2)N	198281-55-9
Cycle3	ctcttctccGA	ggagaagagAC	NC1=C(C=CC=C1Br)C#N	114344-60-4
Cycle3	ttctccccaGA	tggggagaaAC	NC1=CC=CC(=C1)[N]2C=CC=N2	184097-88-9
Cycle3	ttcctacacGA	gtgtaggaaAC	NC1=C(N=C(Cl)C=C1)C#N	95095-84-4
Cycle3	cgttcacagGA	ctgtgaacgAC	NC1=NN=C(Cl)C=C1Br	446273-59-2
Cycle3	tagcgttgcGA	gcaacgctaAC	NC1=CC=C2[NH]C(=NC2=C1)CO	294656-36-3
Cycle3	agtgtctacGA	gtagacactAC	NC1=CC2=C(C=C1)C(=O)OC2	65399-05-5
Cycle3	actgcgacaGA	tgtcgcagtAC	NC1=CC2=C(C=C1)N=CN=C2	101421-72-1
Cycle3	ttgagttcgGA	cgaactcaaAC	COC(=O)C1=CC(=CC=C1N)C	18595-16-9
Cycle3	tcgtaagccGA	ggcttacgaAC	CC(C)[N]1N=CC2=C1C=CC(=C2)N	928821-18-5
Cycle3	tggtccaagGA	cttggaccaAC	NC1=CN=CC=C1C#N	78790-79-1
Cycle3	ggattacgaGA	tcgtaatccAC	NC1=C2C=C[NH]C2=CC=C1	5192-23-4
Cycle3	ctcaacagaGA	tctgttgagAC	NC1=C2C=C(Br)C=CC2=NC=C1	65340-73-0
Cycle3	aggtggttaGA	taaccacctAC	NC1=CC=C(F)C=C1N2CCOCC2	232951-87-0
Cycle3	aacattcggGA	ccgaatgttAC	COC(=O)C1=CC(=CC(=C1)N)Cl	21961-31-9
Cycle3	ttcgtcacaGA	tgtgacgaaAC	NC1=C(I)C=CC=C1C(O)=O	20776-55-0
Cycle3	tcgcgagatGA	atctcgcgaAC	C[N]1C=C(N)C=N1	69843-13-6
Cycle3	agacttgcaGA	tgcaagtctAC	NCC1=CC=CC(=C1)O	73604-31-6
Cycle3	ctgccgataGA	tatcggcagAC	COC(=O)C1=CC(=C(O)C=C1)N	536-25-4
Cycle3	cagtgctttGA	aaagcactgAC	CC(C)(C#N)C1=CC=C(N)C=N1	1226776-95-9
Cycle3	acagctaagGA	cttagctgtAC	CC(=O)NC1=NC(=CS1)C2=CC(=CC=C2)N	134812-30-9
Cycle3	ggaatcagaGA	tctgattccAC	C[N]1C=C(N)C(=N1)C	64517-88-0
Cycle3	gaacgggatGA	atcccgttcAC	NC1=CC=C2N=COC2=C1	177492-52-3
Cycle3	gaccgctatGA	atagcggtcAC	NC1=CC(=NO1)C2=CC=CC(=C2)Br	119162-52-6
Cycle3	cgataagagGA	ctcttatcgAC	NC1=CC=C(C=C1)N2CCCC2=O	13691-22-0
Cycle3	ggatcatcgGA	cgatgatccAC	COC1=C(C=CC=C1)C2=CC=CC(=C2)N	96923-01-2
Cycle3	tgtaagtccGA	ggacttacaAC	CC1=CC=C(N)C(=C1)CO	34897-84-2
Cycle3	cgaggtataGA	tatacctcgAC	NC1=CC=C(C=C1)C2(CCCC2)C#N	115279-73-7
Cycle3	cttccaaacGA	gtttggaagAC	C[S](=O)(=O)C1=CC=CC=C1CN	410545-65-2
Cycle3	tgtacgcaaGA	ttgcgtacaAC	NCC1=CN=C(C=C1)[N]2C=CC=N2	956191-88-1
Cycle3	ctcattgccGA	ggcaatgagAC	NCC1=CC=CC=C1CO	4152-92-5
Cycle3	ttgcgccatGA	atggcgcaaAC	NCC(O)C1=CC=CC=C1Cl	23496-56-2
Cycle3	cgttctcttGA	aagagaacgAC	NCC(CC1=CC=C(Cl)C=C1)C(O)=O	791615-75-3
Cycle3	aagattcgcGA	gcgaatcttAC	NCC1=CC=C(N=C1)C(F)(F)F	387350-39-2
Cycle3	caatcgcacGA	gtgcgattgAC	NCC1=N[NH]N=N1	31602-63-8
Cycle3	aacgcactaGA	tagtgcgttAC	C[N]1C=NC=C1CN	486414-86-2
Cycle3	ctcagctttGA	aaagctgagAC	NCC1=CC=CC=C1N2CCCC2	72752-53-5
Cycle3	tgttgtctcGA	gagacaacaAC	CN(C)CCOC1=C(CN)C=CC=C1	91215-97-3
Cycle3	aaaggctggGA	ccagcctttAC	CN1CCN(CC1)C2=CC(=CC=C2)CN	672325-37-0
Cycle3	aggcactaaGA	ttagtgcctAC	NCC1=CC=CC(=C1)C2=NN=N[NH]2	765877-97-2
Cycle3	gatgtgcgaGA	tcgcacatcAC	NCC1=CC2=C(C=C1)N=CC=C2	99071-54-2
Cycle3	gtggtgtttGA	aaacaccacAC	CN(C)CCOC1=CC=C(CN)C=C1	20059-73-8
Cycle3	ctgtgttagGA	ctaacacagAC	NCCC1=NN=N[NH]1	31602-64-9
Cycle3	atagcagcaGA	tgctgctatAC	NCC1=CC(=CC=C1)N2CCCCC2	175696-71-6
Cycle3	gttctctctGA	agagagaacAC	NCC1=CC(=CC=C1)CO	34231-22-6
Cycle3	cttaaccgcGA	gcggttaagAC	NCCC1=NC2=CC=CC=C2[NH]1	29518-68-1
Cycle3	tgatcgtgaGA	tcacgatcaAC	NCC1=CC(=CC=C1)C#N	10406-24-3
Cycle3	tccgattgtGA	acaatcggaAC	NCC[N]1C=CC=N1	101395-71-5
Cycle3	ccttacgtaGA	tacgtaaggAC	C[N]1N=C(CN)C=C1C	423768-52-9
Cycle3	gcgtacgtaGA	tacgtacgcAC	NCC1=CC=CC=C1[N]2C=CC=N2	449758-13-8
Cycle3	tccgatgtaGA	tacatcggaAC	NCCC1=CC=CC=C1O	2039-66-9
Cycle3	aacgtggatGA	atccacgttAC	C	C
