# Supplementary material for: Diversified strategy for the synthesis of DNA-encoded oxindole libraries
Source: Royal Society of Chemistry journal article supplement (doi:10.1039/d0sc06696f), 2021-01-01
Supplement: d0sc06696f5.xlsx [file d0sc06696f5.xlsx]

## Sheet: Plate1-12
			Smiles	CAS
Cycle1	ctcagcttaAG	taagctgagCA	C#CC[C@@H](NC(OCC1C2=CC=CC=C2C3=CC=CC=C31)=O)CC(O)=O	332064-94-5
Cycle1	cttaggctgAG	cagcctaagCA	FC=1C=CC(=CC1)C[C@H](CC(O)=O)NC(OCC2C3=CC=CC=C3C4=CC=CC=C42)=O	331763-70-3
Cycle1	aagcggcttAG	aagccgcttCA	N#CC=1C=CC(=CC1)C[C@@H](CC(O)=O)NC(OCC2C3=CC=CC=C3C4=CC=CC=C42)=O	270065-90-2
Cycle1	cacacagacAG	gtctgtgtgCA	FC1=C(F)C(F)=C(F)C(F)=C1C[C@@H](CC(O)=O)NC(OCC2C3=CC=CC=C3C4=CC=CC=C42)=O	270063-43-9
Cycle1	cacggcaatAG	attgccgtgCA	C#CC[C@H](NC(OCC1C2=CC=CC=C2C3=CC=CC=C31)=O)CC(O)=O	1217669-02-7
Cycle1	cgtccttcaAG	tgaaggacgCA	FC1=C(F)C(F)=C(F)C(F)=C1C[C@H](CC(O)=O)NC(OCC2C3=CC=CC=C3C4=CC=CC=C42)=O	269398-94-9
Cycle1	ttcaacgccAG	ggcgttgaaCA	O=C(O)[C@H]1C[C@H](C=C1)NC(OCC2C3=CC=CC=C3C4=CC=CC=C42)=O	220497-64-3
Cycle1	gtcgagttcAG	gaactcgacCA	ClC1=CC2=C(C=C1)C(C[C@H](C(O)=O)NC(OCC3C4=CC=CC=C4C5=CC=CC=C53)=O)=CN2	925916-73-0
Cycle1	tttcgcggaAG	tccgcgaaaCA	N#CC=1C=CC(=CC1)C[C@H](CC(O)=O)NC(OCC2C3=CC=CC=C3C4=CC=CC=C42)=O	269726-87-6
Cycle1	tgaccctaaAG	ttagggtcaCA	O=C(O)[C@@H](NC(OCC1C2=CC=CC=C2C3=CC=CC=C31)=O)CCC4CCCCC4	269078-73-1
Cycle1	aaggcatagAG	ctatgccttCA	C1=CC=C2CN([C@@H](CC2=C1)C(=O)O)C(=O)OCC3C4=CC=CC=C4C5=CC=CC=C53	136030-33-6
Cycle1	cagccatagAG	ctatggctgCA	ClC=1C=CC(=CC1)C[C@H](C(O)=O)NC(OCC2C3=CC=CC=C3C4=CC=CC=C42)=O	142994-19-2
Cycle1	gaacgcagtAG	actgcgttcCA	N#CC=1C=CC(=CC1)C[C@H](C(O)=O)NC(OCC2C3=CC=CC=C3C4=CC=CC=C42)=O	205526-34-7
Cycle1	ccaaacttgAG	caagtttggCA	C1=CC=C2C(=C1)C3=CC=CC=C3C2COC(=O)N4CCCC[C@@H]4C(=O)O	101555-63-9
Cycle1	agcatgaacAG	gttcatgctCA	O=C(O)[C@H](NC(OCC1C2=CC=CC=C2C3=CC=CC=C31)=O)C4CCCCC4	198543-96-3
Cycle1	cctatggcaAG	tgccataggCA	O=C(O)[C@H](NC(OCC1C2=CC=CC=C2C3=CC=CC=C31)=O)CCC4CCCCC4	269078-72-0
Cycle1	gtagctcttAG	aagagctacCA	O=C([C@@H]1C[C@H](NC(OCC2C3=C(C4=C2C=CC=C4)C=CC=C3)=O)CC1)O	220497-66-5
Cycle1	ttgtgtagcAG	gctacacaaCA	C1=CC=C2C(=C1)C3=CC=CC=C3C2COC(=O)N4CC(C4)C(=O)O	193693-64-0
Cycle1	tgcatgcacAG	gtgcatgcaCA	C1=CC=C2C(=C1)C3=CC=CC=C3C2COC(=O)N4CCC[C@H]4C(=O)N5CCC[C@H]5C(=O)O	129223-22-9
Cycle1	ggtcttacaAG	tgtaagaccCA	O=C(O)[C@H](CC1=CSC=C1)NC(OCC2C3=CC=CC=C3C4=CC=CC=C42)=O	186320-06-9
Cycle1	catcgtagtAG	actacgatgCA	ClC1=CC2=C(C=C1)C(C[C@@H](C(O)=O)NC(OCC3C4=CC=CC=C4C5=CC=CC=C53)=O)=CN2	908847-42-7
Cycle1	gtaagatcgAG	cgatcttacCA	O=C(O)[C@H](CC1=CSC=N1)NC(OCC2C3=CC=CC=C3C4=CC=CC=C42)=O	205528-32-1
Cycle1	caccaacacAG	gtgttggtgCA	CN([C@@H](CC1CCCCC1)C(=O)O)C(=O)OCC2C3=CC=CC=C3C4=CC=CC=C42	148983-03-3
Cycle1	ggttaggagAG	ctcctaaccCA	O=C(O)[C@H](CC1=CC=CO1)NC(OCC2C3=CC=CC=C3C4=CC=CC=C42)=O	159611-02-6
Cycle1	tgcttggatAG	atccaagcaCA	O=C(O)[C@H](NC(OCC1C2=CC=CC=C2C3=CC=CC=C31)=O)CC=4C=CC(=CC4)C5=CC=CC=C5	205526-38-1
Cycle1	aagcagagtAG	actctgcttCA	O=C(O)C1CCC(CC1)CNC(OCC2C3=CC=CC=C3C4=CC=CC=C42)=O	188715-40-4
Cycle1	cagacgaatAG	attcgtctgCA	C=CCC(C(O)=O)(NC(OCC1C2=CC=CC=C2C3=CC=CC=C31)=O)CC=C	1311992-97-8
Cycle1	ctatctaccAG	ggtagatagCA	O=C(O)C[C@H](C1=CC([N+]([O-])=O)=CC=C1)NC(OCC2C3=CC=CC=C3C4=CC=CC=C42)=O	374791-04-5
Cycle1	tggctttccAG	ggaaagccaCA	NC(NCCC[C@H](C(O)=O)NC(OCC1C2=CC=CC=C2C3=CC=CC=C31)=O)=O	200344-33-8
Cycle1	gaagcaaagAG	ctttgcttcCA	O=C(O)C[C@H](C1=CC=C(Br)C=C1)NC(OCC2C3=CC=CC=C3C4=CC=CC=C42)=O	220498-04-4
Cycle1	acagtactcAG	gagtactgtCA	CC1=CC=CC=C1[C@H](NC(OCC2C3=CC=CC=C3C4=CC=CC=C42)=O)CC(O)=O	507472-27-7
Cycle1	ctatactggAG	ccagtatagCA	O=C(O)C[C@H](C1=CC=C(C(F)(F)F)C=C1)NC(OCC2C3=CC=CC=C3C4=CC=CC=C42)=O	517905-88-3
Cycle1	ccaagagctAG	agctcttggCA	O=C(O)CC(C1=CC=C(Br)C=C1)NC(OCC2C3=CC=CC=C3C4=CC=CC=C42)=O	269078-76-4
Cycle1	taagtccctAG	agggacttaCA	CC1=CC=C(C(NC(OCC2C3=CC=CC=C3C4=CC=CC=C42)=O)CC(O)=O)C=C1	284492-08-6
Cycle1	cccaaggatAG	atccttgggCA	C1=CC=C(C=C1)C[C@@H](C(=O)N2CCC[C@H]2C(=O)O)NC(=O)OCC3C4=C(C=CC=C4)C5=C3C=CC=C5	138372-76-6
Cycle1	agaggaagaAG	tcttcctctCA	C=CCC(NC(OCC1C2=CC=CC=C2C3=CC=CC=C31)=O)C(O)=O	221884-63-5
Cycle1	ggagcatttAG	aaatgctccCA	C1CCC2C(C1)C[C@H](C(=O)O)N2C(=O)OCC3C4=CC=CC=C4C5=CC=CC=C53	1217512-55-4
Cycle1	tcggatcacAG	gtgatccgaCA	O=C(O)C[C@@H](CC1=CC=CS1)NC(OCC2C3=CC=CC=C3C4=CC=CC=C42)=O	270262-98-1
Cycle1	aggtctggtAG	accagacctCA	C=CC[C@@H](NC(OCC1C2=CC=CC=C2C3=CC=CC=C31)=O)C(O)=O	170642-28-1
Cycle1	cgttctgtaAG	tacagaacgCA	C#CCCC[C@@H](C(=O)O)NC(=O)OCC1C2=C(C=CC=C2)C3=C1C=CC=C3	1097192-05-6
Cycle1	gaatggggaAG	tccccattcCA	FC1=C(F)C(F)=C(F)C(F)=C1C[C@@H](C(O)=O)NC(OCC2C3=CC=CC=C3C4=CC=CC=C42)=O	205526-32-5
Cycle1	gatcgccttAG	aaggcgatcCA	CC1=CC=C(C[C@H](NC(OCC2C3=CC=CC=C3C4=CC=CC=C42)=O)C(O)=O)C=C1	199006-54-7
Cycle1	tacctcttgAG	caagaggtaCA	CC1=C(C(C)=CC(O)=C1)C[C@H](NC(OCC2C3=CC=CC=C3C4=CC=CC=C42)=O)C(O)=O	206060-54-0
Cycle1	gagtcacgtAG	acgtgactcCA	O=C(O)[C@H](CC1=CSC2=CC=CC=C12)NC(OCC3C4=CC=CC=C4C5=CC=CC=C53)=O	177966-60-8
Cycle1	ttgtcggaaAG	ttccgacaaCA	O=C([C@H]1N(C(OCC2C3=C(C4=C2C=CC=C4)C=CC=C3)=O)[C@@]5([H])CCCC[C@@]5([H])C1)O	130309-37-4
Cycle1	acaggtaacAG	gttacctgtCA	O=C(O)C1=CC=CC(CNC(OCC2C3=CC=CC=C3C4=CC=CC=C42)=O)=C1	155369-11-2
Cycle1	tttaagccgAG	cggcttaaaCA	FC1=CC(C[C@H](C(O)=O)NC(OCC2C3=CC=CC=C3C4=CC=CC=C42)=O)=CC(F)=C1F	205526-31-4
Cycle1	aagtcgtacAG	gtacgacttCA	ClC=1C=CC(=CC1Cl)C[C@@H](C(O)=O)NC(OCC2C3=CC=CC=C3C4=CC=CC=C42)=O	177966-59-5
Cycle1	aaaagcgtcAG	gacgcttttCA	C1=CC=C2C(=C1)C3=CC=CC=C3C2COC(=O)N4CCC(C4)C(=O)O	885951-89-3
Cycle1	agtcatggtAG	accatgactCA	IC=1C=CC(=CC1)C[C@@H](C(O)=O)NC(OCC2C3=CC=CC=C3C4=CC=CC=C42)=O	82565-68-2
Cycle1	cagttcaagAG	cttgaactgCA	IC=1C=CC(=CC1)C[C@H](C(O)=O)NC(OCC2C3=CC=CC=C3C4=CC=CC=C42)=O	205526-29-0
Cycle1	cagagtgatAG	atcactctgCA	C1=CC=C2C(=C1)C[C@@H](C(=O)O)N2C(=O)OCC3C4=CC=CC=C4C5=CC=CC=C53	198560-38-2
Cycle1	gttggtgttAG	aacaccaacCA	O=[N+]([O-])C=1C=CC(=C(C1)[N+]([O-])=O)NC[C@@H](C(O)=O)NC(OCC2C3=CC=CC=C3C4=CC=CC=C42)=O	140430-54-2
Cycle1	cgattccgtAG	acggaatcgCA	O=C(O)[C@@H](CC1=CSC2=CC=CC=C12)NC(OCC3C4=CC=CC=C4C5=CC=CC=C53)=O	177966-61-9
Cycle1	cgctaaatcAG	gatttagcgCA	O=C(O)[C@H](CC1CC1)NC(OCC2C3=CC=CC=C3C4=CC=CC=C42)=O	214750-76-2
Cycle1	actgtgcatAG	atgcacagtCA	O=C(O)C[C@H](CC1=CC=CO1)NC(OCC2C3=CC=CC=C3C4=CC=CC=C42)=O	270263-07-5
Cycle1	catagcacgAG	cgtgctatgCA	O=C(O)C1(NC(OCC2C3=CC=CC=C3C4=CC=CC=C42)=O)CCCCC1	162648-54-6
Cycle1	gtgctgatgAG	catcagcacCA	FC1=CC2=C(C=C1)C(CC(C(O)=O)NC(OCC3C4=CC=CC=C4C5=CC=CC=C53)=O)=CN2	1219392-55-8
Cycle1	gggcctttaAG	taaaggcccCA	ClC=1C=CC(=CC1Cl)C[C@H](C(O)=O)NC(OCC2C3=CC=CC=C3C4=CC=CC=C42)=O	177966-58-4
Cycle1	cagtctggaAG	tccagactgCA	BrC=1C=CC(=CC1)C[C@@H](C(O)=O)NC(OCC2C3=CC=CC=C3C4=CC=CC=C42)=O	198561-04-5
Cycle1	ctgttgactAG	agtcaacagCA	O=[N+]([O-])C=1C=CC(=CC1)C[C@H](C(O)=O)NC(OCC2C3=CC=CC=C3C4=CC=CC=C42)=O	177966-63-1
Cycle1	gaccaatccAG	ggattggtcCA	O=C(O)C[C@@H](NC(OCC1C2=CC=CC=C2C3=CC=CC=C31)=O)C/C=C/C4=CC=CC=C4	1217460-65-5
Cycle1	cgcttacatAG	atgtaagcgCA	O=C(O)[C@@H](CC1=CN=CC=C1)NC(OCC2C3=CC=CC=C3C4=CC=CC=C42)=O	142994-45-4
Cycle1	ccgtttacaAG	tgtaaacggCA	O=C(O)[C@@H](NC(OCC1C2=CC=CC=C2C3=CC=CC=C31)=O)C4CCCC4	220497-61-0
Cycle1	gtaacacgcAG	gcgtgttacCA	O=C(O)C=1C=CC(=CC1)CNC(OCC2C3=CC=CC=C3C4=CC=CC=C42)=O	164470-64-8
Cycle1	cttctggtaAG	taccagaagCA	O=C(O)C1(CCCC1)NC(OCC2C3=CC=CC=C3C4=CC=CC=C42)=O	117322-30-2
Cycle1	accagttacAG	gtaactggtCA	O=C(O)C1(CCC1)NC(OCC2C3=CC=CC=C3C4=CC=CC=C42)=O	885951-77-9
Cycle1	agacaccagAG	ctggtgtctCA	FC(F)(F)C=1C=CC(=CC1)C[C@@H](C(O)=O)NC(OCC2C3=CC=CC=C3C4=CC=CC=C42)=O	247113-86-6
Cycle1	cgaatgagtAG	actcattcgCA	C1=CC=C2C(=C1)C3=CC=CC=C3C2COC(=O)N4CC5=CC(=CC=C5C[C@H]4C(=O)O)O	178432-49-0
Cycle1	tgaacgtctAG	agacgttcaCA	COC1=C(OC)C=C(C[C@H](NC(OCC2C3=CC=CC=C3C4=CC=CC=C42)=O)C(O)=O)C=C1	184962-88-7
Cycle1	cggaacatcAG	gatgttccgCA	O=C(O)[C@H](CC1=CC=CS1)NC(OCC2C3=CC=CC=C3C4=CC=CC=C42)=O	130309-35-2
Cycle1	agcagatgcAG	gcatctgctCA	OC=1C=CC2=C(C1)C(=CN2)C[C@@H](C(O)=O)NC(OCC3C4=CC=CC=C4C5=CC=CC=C53)=O	178119-94-3
Cycle1	gctctcgaaAG	ttcgagagcCA	O=C(O)[C@H]1CCC[C@@H]1NC(OCC2C3=CC=CC=C3C4=CC=CC=C42)=O	359586-64-4
Cycle1	aggaacctcAG	gaggttcctCA	O=C(O)C[C@H](CC1=CSC=C1)NC(OCC2C3=CC=CC=C3C4=CC=CC=C42)=O	270263-01-9
Cycle1	gccctaactAG	agttagggcCA	O=C(O)C1(CCOCC1)NC(OCC2C3=CC=CC=C3C4=CC=CC=C42)=O	285996-72-7
Cycle1	acctcagacAG	gtctgaggtCA	O=C(O)[C@H](C1=CSC=C1)NC(OCC2C3=CC=CC=C3C4=CC=CC=C42)=O	1217706-09-6
Cycle1	acccgattgAG	caatcgggtCA	O=C(O)C1(CC1)NC(OCC2C3=CC=CC=C3C4=CC=CC=C42)=O	126705-22-4
Cycle1	tatgactccAG	ggagtcataCA	C1=CC=C2C(=C1)C3=CC=CC=C3C2COC(=O)NC4=CC=C(C=C4)C(=O)O	185116-43-2
Cycle1	catgaggtgAG	cacctcatgCA	C#CC[C@@H](NC(OCC1C2=CC=CC=C2C3=CC=CC=C31)=O)C(O)=O	220497-98-3
Cycle1	cccagtatgAG	catactgggCA	C#CC[C@H](NC(OCC1C2=CC=CC=C2C3=CC=CC=C31)=O)C(O)=O	198561-07-8
Cycle1	gagttttccAG	ggaaaactcCA	ClC=1C=CC(=C(C1)Cl)C[C@@H](C(O)=O)NC(OCC2C3=CC=CC=C3C4=CC=CC=C42)=O	352351-62-3
Cycle1	gggcttagtAG	actaagcccCA	FC1=CC(C[C@@H](C(O)=O)NC(OCC2C3=CC=CC=C3C4=CC=CC=C42)=O)=CC(F)=C1F	205526-30-3
Cycle1	cttcccgtaAG	tacgggaagCA	O=C(O)[C@H](CC1=CN=CC=C1)NC(OCC2C3=CC=CC=C3C4=CC=CC=C42)=O	175453-07-3
Cycle1	tttgagcgtAG	acgctcaaaCA	O=C(O)[C@H](NC(OCC1C2=CC=CC=C2C3=CC=CC=C31)=O)C4CCCC4	136555-16-3
Cycle1	tgctctcgaAG	tcgagagcaCA	O=C(O)[C@@H](NC(OCC1C2=CC=CC=C2C3=CC=CC=C31)=O)CCCNC(OCC4=CC=CC=C4)=O	138775-07-2
Cycle1	cgcatgcatAG	atgcatgcgCA	FC(F)(F)C(NCCCC[C@@H](C(O)=O)NC(OCC1C2=CC=CC=C2C3=CC=CC=C31)=O)=O	76265-69-5
Cycle1	cactgcgttAG	aacgcagtgCA	O=C(CC[C@H](NC(OCC1C2=CC=CC=C2C3=CC=CC=C31)=O)C(O)=O)OC4CCCCC4	150047-85-1
Cycle1	gtttagtggAG	ccactaaacCA	[N-]=[N+]=NCCC[C@@H](C(O)=O)NC(OCC1C2=CC=CC=C2C3=CC=CC=C31)=O	1097192-04-5
Cycle1	accggcttaAG	taagccggtCA	C#CC[C@](C(O)=O)(NC(OCC1C2=CC=CC=C2C3=CC=CC=C31)=O)C	1198791-65-9
Cycle1	ctaacaaccAG	ggttgttagCA	C[C@@H](OCC1=CC=CC=C1)[C@H](NC(OCC2C3=CC=CC=C3C4=CC=CC=C42)=O)C(O)=O	117872-75-0
Cycle1	gtcaacgttAG	aacgttgacCA	O=C(O)C[C@H](C1=CC=C([N+]([O-])=O)C=C1)NC(OCC2C3=CC=CC=C3C4=CC=CC=C42)=O	507472-26-6
Cycle1	ctccgttgtAG	acaacggagCA	COC1=CC(OC)=CC([C@H](NC(OCC2C3=CC=CC=C3C4=CC=CC=C42)=O)CC(O)=O)=C1	511272-41-6
Cycle1	agttaaggcAG	gccttaactCA	O=C(O)C[C@H](C1=CN=CC=C1)NC(OCC2C3=CC=CC=C3C4=CC=CC=C42)=O	511272-43-8
Cycle1	gaaacgtcgAG	cgacgtttcCA	O=C(O)C[C@H](C1=CC=CS1)NC(OCC2C3=CC=CC=C3C4=CC=CC=C42)=O	511272-45-0
Cycle1	ggtacagtaAG	tactgtaccCA	O=C(O)C[C@H](C1=CC=CO1)NC(OCC2C3=CC=CC=C3C4=CC=CC=C42)=O	1217662-55-9
Cycle1	tcacagcatAG	atgctgtgaCA	CC(C1=CC=C(C[C@H](NC(OCC2C3=CC=CC=C3C4=CC=CC=C42)=O)C(O)=O)C=C1)=O	204716-07-4
Cycle1	tacgactgtAG	acagtcgtaCA	O=C(O)C1=CC(NC(OCC2C3=CC=CC=C3C4=CC=CC=C42)=O)=C(N)C=C1	1071446-05-3
Cycle1	gatcagggtAG	accctgatcCA	C1(C2=C(C=CC=C2)C3=C1C=CC=C3)COC(N[C@H](C(=O)O)C4=CC=C(C=C4)OC)=O	1260596-73-3
Cycle1	aaagcggttAG	aaccgctttCA	O=C(O)[C@H](CC1=CNC2=C1C=CC=N2)NC(OCC3C4=CC=CC=C4C5=CC=CC=C53)=O	737007-45-3
Cycle1	caacacagtAG	actgtgttgCA	N1([C@H](C(=O)O)C[C@H](C1)F)C(=O)OCC1c2c(cccc2)c2c1cccc2	1228307-81-0
Cycle1	gagatacgtAG	acgtatctcCA	FC1=CC(C[C@H](C(O)=O)NC(OCC2C3=CC=CC=C3C4=CC=CC=C42)=O)=CC(F)=C1	205526-25-6
Cycle1	aaagtggggAG	ccccactttCA	FC=1C=CC(=C(C1)F)C[C@@H](C(O)=O)NC(OCC2C3=CC=CC=C3C4=CC=CC=C42)=O	1032337-49-7
Cycle1	gaccgaaatAG	atttcggtcCA	C1=CC=C2C(=C1)C3=CC=CC=C3C2COC(=O)N4CSC[C@H]4C(=O)O	133054-21-4
Cycle1	acgatgcaaAG	ttgcatcgtCA	C1(C2=C(C=CC=C2)C3=C1C=CC=C3)COC(N([C@H](C(=O)O)CC4=CC=C(C=C4)Cl)C)=O	1217716-50-1
Cycle1	tggtgttctAG	agaacaccaCA	O=C(O)C1(NC(OCC2C3=CC=CC=C3C4=CC=CC=C42)=O)CC5=CC=CC=C5C1	135944-07-9
Cycle1	aagcttcctAG	aggaagcttCA	O=C(O)[C@H](CC1CCC1)NC(OCC2C3=CC=CC=C3C4=CC=CC=C42)=O	478183-62-9
Cycle1	cgttgtgtcAG	gacacaacgCA	O=C(O)[C@@H]1CCC[C@H]1NC(OCC2C3=CC=CC=C3C4=CC=CC=C42)=O	359586-69-9
Cycle1	ggcgatattAG	aatatcgccCA	O=C(O)CC1(NC(OCC2C3=CC=CC=C3C4=CC=CC=C42)=O)CCCCC1	282524-98-5
Cycle1	ttaggaggtAG	acctcctaaCA	O=C(O)CC1(CNC(OCC2C3=CC=CC=C3C4=CC=CC=C42)=O)CCCCC1	882847-19-0
Cycle1	catatccacAG	gtggatatgCA	O=C(O)[C@@H]1CC[C@H](CC1)CNC(OCC2C3=CC=CC=C3C4=CC=CC=C42)=O	167690-53-1
Cycle1	cgcagtagtAG	actactgcgCA	O=[N+]([O-])C=1C=CC(=CC1)C[C@@H](C(O)=O)NC(OCC2C3=CC=CC=C3C4=CC=CC=C42)=O	95753-55-2
Cycle1	aacatcctgAG	caggatgttCA	C1=CC=C2C(=C1)C3=CC=CC=C3C2COC(=O)N4CCCC[C@H]4C(=O)O	86069-86-5
Cycle1	tagcaccagAG	ctggtgctaCA	O=C(O)[C@@H]1CC[C@H](CC1)NC(OCC2C3=CC=CC=C3C4=CC=CC=C42)=O	147900-46-7
Cycle1	gcatttcggAG	ccgaaatgcCA	CC1(OCC2=C(O1)C=CC(C[C@H](NC(OCC3C4=CC=CC=C4C5=CC=CC=C53)=O)C(O)=O)=C2)C	252049-13-1
Cycle1	gaactaggtAG	acctagttcCA	IC=1C=CC(=CC1)C[C@H](CC(O)=O)NC(OCC2C3=CC=CC=C3C4=CC=CC=C42)=O	269396-73-8
Cycle1	gtgcatgacAG	gtcatgcacCA	BrC=1C=CC(=CC1)C[C@@H](CC(O)=O)NC(OCC2C3=CC=CC=C3C4=CC=CC=C42)=O	270062-86-7
Cycle1	gtcgatggaAG	tccatcgacCA	ClC=1C=CC(=CC1Cl)C[C@@H](CC(O)=O)NC(OCC2C3=CC=CC=C3C4=CC=CC=C42)=O	270063-52-0
Cycle1	acaatagcgAG	cgctattgtCA	IC=1C=CC(=CC1)C[C@@H](CC(O)=O)NC(OCC2C3=CC=CC=C3C4=CC=CC=C42)=O	270065-72-0
Cycle1	aaagctgcgAG	cgcagctttCA	O=C(O)C[C@H](CC1=CNC2=CC=CC=C12)NC(OCC3C4=CC=CC=C4C5=CC=CC=C53)=O	353245-98-4
Cycle1	atgagactcAG	gagtctcatCA	O=C(O)C[C@@H](C1=CC=C(F)C=C1)NC(OCC2C3=CC=CC=C3C4=CC=CC=C42)=O	479064-89-6
Cycle1	gagcagacaAG	tgtctgctcCA	O=C(O)C[C@@H](C1=C(Cl)C(Cl)=CC=C1)NC(OCC2C3=CC=CC=C3C4=CC=CC=C42)=O	501015-35-6
Cycle1	gaaaatgggAG	cccattttcCA	O=C(O)C[C@H](C1=C(Cl)C=C(Cl)C=C1)NC(OCC2C3=CC=CC=C3C4=CC=CC=C42)=O	511272-37-0
Cycle1	aagcgacaaAG	ttgtcgcttCA	O=C(O)[C@@H](NC(OCC1C2=CC=CC=C2C3=CC=CC=C31)=O)C4CCCCC4	161321-36-4
Cycle1	cacttggtaAG	taccaagtgCA	O=C(O)[C@@H](NC(OCC1C2=CC=CC=C2C3=CC=CC=C31)=O)CC4=CC=CC=C4F	205526-26-7
Cycle1	aaagtccgcAG	gcggactttCA	FC=1C=CC(=CC1F)C[C@H](C(O)=O)NC(OCC2C3=CC=CC=C3C4=CC=CC=C42)=O	198545-59-4
Cycle1	ttacctggaAG	tccaggtaaCA	FC=1C=CC(=CC1)C[C@@H](C(O)=O)NC(OCC2C3=CC=CC=C3C4=CC=CC=C42)=O	169243-86-1
Cycle1	tgaacacgtAG	acgtgttcaCA	C1=CC=C2CN([C@H](CC2=C1)C(=O)O)C(=O)OCC3C4=CC=CC=C4C5=CC=CC=C53	130309-33-0
Cycle1	cgaacacaaAG	ttgtgttcgCA	O=C(O)[C@H](NC(OCC1C2=CC=CC=C2C3=CC=CC=C31)=O)CC4=CC=CC=C4Cl	205526-22-3
Cycle1	cttggacgaAG	tcgtccaagCA	N#CC=1C=CC(=CC1)C[C@@H](C(O)=O)NC(OCC2C3=CC=CC=C3C4=CC=CC=C42)=O	173963-93-4
Cycle1	ctgtttctgAG	cagaaacagCA	CC(C)(OC(N1CCCC(C1)CC(NC(OCC2C3=CC=CC=C3C4=CC=CC=C42)=O)C(O)=O)=O)C	457060-97-8
Cycle1	gaggcacatAG	atgtgcctcCA	C[C@]1(CCCN1C(=O)OCC2C3=CC=CC=C3C4=CC=CC=C42)C(=O)O	167275-47-0
Cycle1	acaattgcgAG	cgcaattgtCA	C(F)(C1=CC=C(C[C@@H](C(O)=O)NC(=O)OCC2C3=C(C4=C2C=CC=C4)C=CC=C3)C=C1)F	1808268-08-7
Cycle1	gtatccgatAG	atcggatacCA	C1CN(C[C@@H](C(=O)O)NC(OCC2C3=C(C4=C2C=CC=C4)C=CC=C3)=O)CCO1	1251903-85-1
Cycle1	ggtttgtacAG	gtacaaaccCA	C1=CC=C2C(=C1)C3=CC=CC=C3C2COC(=O)N4CCC[C@@H]4CC(=O)O	193693-61-7
Cycle1	tatccccttAG	aaggggataCA	C1=CC=C2C(=C1)C3=CC=CC=C3C2COC(=O)N4CC[C@@H]4C(=O)O	374791-02-3
Cycle1	caggtctcaAG	tgagacctgCA	O=C(O)C1(NC(OCC2C3=CC=CC=C3C4=CC=CC=C42)=O)CCC5=CC=CC=C51	214139-28-3
Cycle1	gtcttcaagAG	cttgaagacCA	C1=CC=C2C(=C1)CN(C2C(=O)O)C(=O)OCC3C4=CC=CC=C4C5=CC=CC=C53	204320-59-2
Cycle1	agcagtcagAG	ctgactgctCA	O=C(O)[C@@H](NC(OCC1C2=CC=CC=C2C3=CC=CC=C31)=O)C/C=C/C4=CC=CC=C4	159610-82-9
Cycle1	gtgtctccaAG	tggagacacCA	C1CC[C@H]2[C@@H](C1)C[C@@H](C(=O)O)N2C(=O)OCC3C4=CC=CC=C4C5=CC=CC=C53	214750-71-7
Cycle1	accctactaAG	tagtagggtCA	CC(C)(C)OC(=O)N1CCN(C1C(=O)O)C(=O)OCC2C3=CC=CC=C3C4=CC=CC=C42	207129-12-2
Cycle1	gtcgggattAG	aatcccgacCA	C1(C2=C(C=CC=C2)C3=C1C=CC=C3)COC(NCC(C(=O)O)C4=CC=C(C=C4)Cl)=O	683217-64-3
Cycle1	cgctgtgatAG	atcacagcgCA	FC=1C=CC(=CC1F)C[C@@H](C(O)=O)NC(OCC2C3=CC=CC=C3C4=CC=CC=C42)=O	198560-43-9
Cycle1	gtttctgtcAG	gacagaaacCA	CC1=CC=CC=C1C[C@H](NC(OCC2C3=CC=CC=C3C4=CC=CC=C42)=O)C(O)=O	211637-75-1
Cycle1	ttggcctctAG	agaggccaaCA	FC(F)(F)C=1C=CC(=CC1)C[C@H](C(O)=O)NC(OCC2C3=CC=CC=C3C4=CC=CC=C42)=O	238742-88-6
Cycle1	gcgcaagaaAG	ttcttgcgcCA	C1=CC=C2C(=C1)C3=CC=CC=C3C2COC(=O)N4C[C@H](C[C@@H]4C(=O)O)O	139262-20-7
Cycle1	ggtagctaaAG	ttagctaccCA	O=C(O)[C@H]1C[C@H](CC1)NC(OCC2C3=CC=CC=C3C4=CC=CC=C42)=O	220497-67-6
Cycle1	agatcagcaAG	tgctgatctCA	CC(C)(OC(N1C[C@@H](C(O)=O)[C@H](NC(OCC2C3=CC=CC=C3C4=CC=CC=C42)=O)C1)=O)C	267230-44-4
Cycle1	caatctggaAG	tccagattgCA	C1=CC=C2C(=C1)C3=CC=CC=C3C2COC(=O)N4CCC[C@@H]4COCC(=O)O	1335206-44-4
Cycle1	aggcaatgcAG	gcattgcctCA	C=CCC[C@@H](NC(OCC1C2=CC=CC=C2C3=CC=CC=C31)=O)C(O)=O	865352-21-2
Cycle1	ttgggtaacAG	gttacccaaCA	C1=CC=C2C(=C1)C3=CC=CC=C3C2COC(=O)N4CCOC[C@@H]4C(=O)O	942153-03-9
Cycle1	cggtccttaAG	taaggaccgCA	O=C(O)[C@H](C1CC1)NC(OCC2C3=CC=CC=C3C4=CC=CC=C42)=O	1212257-18-5
Cycle1	gctaagtgcAG	gcacttagcCA	CC(C)(OC(N1CCC(C(NC(OCC2C3=CC=CC=C3C4=CC=CC=C42)=O)C(O)=O)CC1)=O)C	313051-96-6
Cycle1	aggggtgatAG	atcacccctCA	CC(C)(OC(N1CCCC(C(NC(OCC2C3=CC=CC=C3C4=CC=CC=C42)=O)CC(O)=O)C1)=O)C	372144-11-1
Cycle1	tggacctgaAG	tcaggtccaCA	O=C(O)C[C@@H](C1=CC=C(C#N)C=C1)NC(OCC2C3=CC=CC=C3C4=CC=CC=C42)=O	507472-24-4
Cycle1	catacatcgAG	cgatgtatgCA	CN1C=C(C2=CC=CC=C21)C[C@@H](NC(OCC3C4=CC=CC=C4C5=CC=CC=C53)=O)C(O)=O	168471-22-5
Cycle1	tcaacccctAG	aggggttgaCA	FC(F)(F)C=1C=CC(=CC1)C[C@@H](CC(O)=O)NC(OCC2C3=CC=CC=C3C4=CC=CC=C42)=O	270065-81-1
Cycle1	tttctctcgAG	cgagagaaaCA	FC1=CC=CC(C[C@H](CC(O)=O)NC(OCC2C3=CC=CC=C3C4=CC=CC=C42)=O)=C1	331763-67-8
Cycle1	actgtctacAG	gtagacagtCA	N#CC1=CC=CC(C[C@H](CC(O)=O)NC(OCC2C3=CC=CC=C3C4=CC=CC=C42)=O)=C1	269726-84-3
Cycle1	tggggctttAG	aaagccccaCA	O=C(O)C[C@H](NC(OCC1C2=CC=CC=C2C3=CC=CC=C31)=O)CC4=CC=CC=C4Cl	268734-29-8
Cycle1	tcgcctagaAG	tctaggcgaCA	C1=CC=C2C(=C1)C3=CC=CC=C3C2COC(=O)N4CCC[C@H]4CC(=O)O	193693-60-6
Cycle1	cacaatcggAG	ccgattgtgCA	C1=CC=C2CN([C@H](CC2=C1)CC(=O)O)C(=O)OCC3C4=CC=CC=C4C5=CC=CC=C53	332064-67-2
Cycle1	gtcggacaaAG	ttgtccgacCA	ClC=1C=CC(=CC1)C[C@H](CC(O)=O)NC(OCC2C3=CC=CC=C3C4=CC=CC=C42)=O	331763-60-1
Cycle1	gcgactgatAG	atcagtcgcCA	ClC=1C=CC(=C(C1)Cl)C[C@@H](CC(O)=O)NC(OCC2C3=CC=CC=C3C4=CC=CC=C42)=O	270063-49-5
Cycle1	cctccagttAG	aactggaggCA	ClC=1C=CC(=C(C1)Cl)C[C@H](CC(O)=O)NC(OCC2C3=CC=CC=C3C4=CC=CC=C42)=O	269396-54-5
Cycle1	cagaacactAG	agtgttctgCA	FC=1C=CC(=CC1)C[C@@H](CC(O)=O)NC(OCC2C3=CC=CC=C3C4=CC=CC=C42)=O	270062-83-4
Cycle1	tcataggcgAG	cgcctatgaCA	O=C(O)C[C@H](CC1=CC=CS1)NC(OCC2C3=CC=CC=C3C4=CC=CC=C42)=O	269726-90-1
Cycle1	tgcgagcatAG	atgctcgcaCA	O=C(O)C[C@H](CC1=CSC2=CC=CC=C12)NC(OCC3C4=CC=CC=C4C5=CC=CC=C53)=O	270063-46-2
Cycle1	accccaaaaAG	ttttggggtCA	BrC=1C=CC(=CC1)C[C@H](CC(O)=O)NC(OCC2C3=CC=CC=C3C4=CC=CC=C42)=O	331763-76-9
Cycle1	ggccatatgAG	catatggccCA	ClC=1C=CC(=CC1)C[C@@H](CC(O)=O)NC(OCC2C3=CC=CC=C3C4=CC=CC=C42)=O	270596-43-5
Cycle1	ggagcgtttAG	aaacgctccCA	ClC=1C=CC(=CC1Cl)C[C@H](CC(O)=O)NC(OCC2C3=CC=CC=C3C4=CC=CC=C42)=O	269396-57-8
Cycle1	catgttgacAG	gtcaacatgCA	FC(F)(F)C=1C=CC(=CC1)C[C@H](CC(O)=O)NC(OCC2C3=CC=CC=C3C4=CC=CC=C42)=O	269726-78-5
Cycle1	gctcacacaAG	tgtgtgagcCA	O=C(O)C[C@H](C1=CC=C(Cl)C=C1)NC(OCC2C3=CC=CC=C3C4=CC=CC=C42)=O	479064-92-1
Cycle1	aggccgattAG	aatcggcctCA	O=C(O)C[C@H](C1=CC(Cl)=CC=C1)NC(OCC2C3=CC=CC=C3C4=CC=CC=C42)=O	511272-53-0
Cycle1	cgcgtttagAG	ctaaacgcgCA	C1CCC(C1)C[C@H](C(=O)O)NC(=O)OCC2C3=C(C=CC=C3)C4=C2C=CC=C4	1262802-59-4
Cycle1	tacatgaggAG	cctcatgtaCA	C=CC[C@H](NC(OCC1C2=CC=CC=C2C3=CC=CC=C31)=O)C(O)=O	146549-21-5
Cycle1	ggttattccAG	ggaataaccCA	O=[N+]([O-])C=1C=CC(=CC1)C[C@H](CC(O)=O)NC(OCC2C3=CC=CC=C3C4=CC=CC=C42)=O	269398-78-9
Cycle1	atgcgaaccAG	ggttcgcatCA	O=[N+]([O-])C=1C=CC(=CC1)C[C@@H](CC(O)=O)NC(OCC2C3=CC=CC=C3C4=CC=CC=C42)=O	270062-88-9
Cycle1	acctgttcgAG	cgaacaggtCA	CC(=O)NCSC[C@@H](C(=O)O)NC(=O)OCC1C2=CC=CC=C2C3=CC=CC=C13	86060-81-3
Cycle1	ggctttgaaAG	ttcaaagccCA	CC(C)(C)OC(=O)NCCCC[C@@H](C(=O)O)NC(=O)OCC1C2=CC=CC=C2C3=CC=CC=C13	71989-26-9
Cycle1	taaacgaccAG	ggtcgtttaCA	C1C[C@H](N(C1)C(=O)OCC2C3=CC=CC=C3C4=CC=CC=C24)C(=O)O	71989-31-6
Cycle1	cctgaaagcAG	gctttcaggCA	CC(C(C(=O)O)NC(=O)OCC1C2=CC=CC=C2C3=CC=CC=C13)OC(C)(C)C	71989-35-0
Cycle1	tgggattgcAG	gcaatcccaCA	CSCCC(C(=O)O)NC(=O)OCC1C2=CC=CC=C2C3=CC=CC=C13	71989-28-1
Cycle1	cttgcatgaAG	tcatgcaagCA	CC(C)(C)OCC(C(=O)O)NC(=O)OCC1C2=CC=CC=C2C3=CC=CC=C13	128107-47-1
Cycle1	gaagcctcaAG	tgaggcttcCA	CC(C)C(C(=O)O)NC(=O)OCC1C2=CC=CC=C2C3=CC=CC=C13	68858-20-8
Cycle1	actcccaacAG	gttgggagtCA	CC(C)CC(C(=O)O)NC(=O)OCC1C2=CC=CC=C2C3=CC=CC=C13	35661-60-0
Cycle1	tgtgctaccAG	ggtagcacaCA	C1=CC=C(C=C1)CC(C(=O)O)NC(=O)OCC2C3=CC=CC=C3C4=CC=CC=C24	35661-40-6
Cycle1	ccgtcctatAG	ataggacggCA	CC(C(=O)O)NC(=O)OCC1C2=CC=CC=C2C3=CC=CC=C13	35661-39-3
Cycle1	actcctgcaAG	tgcaggagtCA	CC(C)(C)OC(=O)CCC(C(=O)O)NC(=O)OCC1C2=CC=CC=C2C3=CC=CC=C13	71989-18-9
Cycle1	tatctggccAG	ggccagataCA	CC(C)(C)OC(=O)CC(C(=O)O)NC(=O)OCC1C2=CC=CC=C2C3=CC=CC=C13	71989-14-5
Cycle1	atgcgctgaAG	tcagcgcatCA	C1=CC=C2C(=C1)C(C3=CC=CC=C32)COC(=O)NCC(=O)O	29022-11-5
Cycle1	ctagtctacAG	gtagactagCA	CCC(C)C(C(=O)O)NC(=O)OCC1C2=CC=CC=C2C3=CC=CC=C13	71989-23-6
Cycle1	cataccgatAG	atcggtatgCA	COC(=O)CC(C(=O)O)NC(=O)OCC1C2=CC=CC=C2C3=CC=CC=C13	145038-53-5
Cycle1	tgacgtgcaAG	tgcacgtcaCA	CC(C)(C)OCC(C(=O)O)NC(=O)OCC1C2=CC=CC=C2C3=CC=CC=C13	71989-33-8
Cycle1	ccactggatAG	atccagtggCA	CC(C(=O)O)NC(=O)OCC1C2=CC=CC=C2C3=CC=CC=C13	79990-15-1
Cycle1	catctatccAG	ggatagatgCA	CC(C)CC(C(=O)O)NC(=O)OCC1C2=CC=CC=C2C3=CC=CC=C13	114360-54-2
Cycle1	caagccgtaAG	tacggcttgCA	CSCCC(C(=O)O)NC(=O)OCC1C2=CC=CC=C2C3=CC=CC=C13	112883-40-6
Cycle1	gcttagtcaAG	tgactaagcCA	C1=CC=C(C=C1)CC(C(=O)O)NC(=O)OCC2C3=CC=CC=C3C4=CC=CC=C24	86123-10-6
Cycle1	gtgtggatcAG	gatccacacCA	CCCCC(C(=O)O)NC(=O)OCC1C2=CC=CC=C2C3=CC=CC=C13	112883-41-7
Cycle1	gtcactggaAG	tccagtgacCA	CC(C)(C)OC(=O)CCC(C(=O)O)NC(=O)OCC1C2=CC=CC=C2C3=CC=CC=C13	104091-08-9
Cycle1	cataccacgAG	cgtggtatgCA	CC(C)C(C(=O)O)NC(=O)OCC1C2=CC=CC=C2C3=CC=CC=C13	84624-17-9
Cycle1	ctcactaacAG	gttagtgagCA	CC(C(C(=O)O)NC(=O)OCC1C2=CC=CC=C2C3=CC=CC=C13)OC(C)(C)C	138797-71-4
Cycle1	gttatacggAG	ccgtataacCA	CC(C)(C)OC1=CC=C(C=C1)CC(C(=O)O)NC(=O)OCC2C3=CC=CC=C3C4=CC=CC=C24	118488-18-9
Cycle1	acagagtagAG	ctactctgtCA	C1CC(N(C1)C(=O)OCC2C3=CC=CC=C3C4=CC=CC=C24)C(=O)O	101555-62-8
Cycle1	gtatgcagtAG	actgcatacCA	C1=CC=C(C=C1)CCC(C(=O)O)NC(=O)OCC2C3=CC=CC=C3C4=CC=CC=C24	135994-09-1
Cycle1	cacaatgccAG	ggcattgtgCA	C1=CC=C2C(=C1)C(C3=CC=CC=C32)COC(=O)NCCC(=O)O	35737-10-1
Cycle1	gccatgtgtAG	acacatggcCA	C1CCC(CC1)CC(C(=O)O)NC(=O)OCC2C3=CC=CC=C3C4=CC=CC=C24	135673-97-1
Cycle1	gagacggatAG	atccgtctcCA	C	C
Cycle2	cagtcagtaGT	tactgactgCT	C1C[C@@H](C(=O)O)NC1	147-85-3	C1=CC2=C(C=C1C(=O)O)C(=O)C(=O)N2		25128-32-9
Cycle2	ggtagtagtGT	actactaccCT	C1[C@@H](C(=O)O)NCS1	34592-47-7	C1=CC2=C(C=C1C(=O)O)C(=O)C(=O)N2		25128-32-9
Cycle2	tgccctaagGT	cttagggcaCT	C1[C@H](CN[C@@H]1C(=O)O)O	51-35-4	C1=CC2=C(C=C1C(=O)O)C(=O)C(=O)N2		25128-32-9
Cycle2	ccgtaatcgGT	cgattacggCT	C1C[C@@H](C(=O)O)NC1	147-85-3	CCOC(=O)CN1C2=CC=CC=C2C(=O)C1=O		41042-21-1
Cycle2	gtgagagtaGT	tactctcacCT	C1[C@@H](C(=O)O)NCS1	34592-47-7	CCOC(=O)CN1C2=CC=CC=C2C(=O)C1=O		41042-21-1
Cycle2	cggttctgtGT	acagaaccgCT	C1[C@H](CN[C@@H]1C(=O)O)O	51-35-4	CCOC(=O)CN1C2=CC=CC=C2C(=O)C1=O		41042-21-1
Cycle3	tatgagcacGA	gtgctcataAC	NC1=CC(=CC(=C1)CO)CO	71176-54-0
Cycle3	atgcactcgGA	cgagtgcatAC	NC1=CC=C(CNC2CC2)C=C1	1082768-71-5
Cycle3	tacgtcttgGA	caagacgtaAC	NC1=NC=N[N]2C=CC=C12	159326-68-8
Cycle3	gttccggtaGA	taccggaacAC	COC(=O)C1=CC2=C(C=C[NH]2)C(=C1)N	121561-15-7
Cycle3	aaatctcccGA	gggagatttAC	NC1=N[NH]C2=C1C=CC(=C2)F	404827-75-4
Cycle3	tcgcagatcGA	gatctgcgaAC	NC1=CN=CC(=N1)C(O)=O	61442-38-4
Cycle3	ggattctgaGA	tcagaatccAC	CN1CCN(CC1)CC2=CC(=CC=C2)N	198281-55-9
Cycle3	gagtcttgaGA	tcaagactcAC	NC1=C(C=CC=C1Br)C#N	114344-60-4
Cycle3	tcctaaccaGA	tggttaggaAC	NC1=CC=CC(=C1)[N]2C=CC=N2	184097-88-9
Cycle3	tcaatcgtcGA	gacgattgaAC	NC1=C(N=C(Cl)C=C1)C#N	95095-84-4
Cycle3	tgtacagcgGA	cgctgtacaAC	NC1=CC2=C(C=C1)C(=O)OC2	65399-05-5
Cycle3	cacatgatcGA	gatcatgtgAC	NC1=CC2=C(C=C1)N=CN=C2	101421-72-1
Cycle3	catttacccGA	gggtaaatgAC	COC(=O)C1=CC(=CC=C1N)C	18595-16-9
Cycle3	ctgcatcgtGA	acgatgcagAC	CC(C)[N]1N=CC2=C1C=CC(=C2)N	928821-18-5
Cycle3	gctcctagtGA	actaggagcAC	NC1=CN=CC=C1C#N	78790-79-1
Cycle3	ttggtgcacGA	gtgcaccaaAC	NC1=C2C=C[NH]C2=CC=C1	5192-23-4
Cycle3	catcaggtcGA	gacctgatgAC	NC1=C2C=C(Br)C=CC2=NC=C1	65340-73-0
Cycle3	tcgtcttctGA	agaagacgaAC	NC1=CC=C(F)C=C1N2CCOCC2	232951-87-0
Cycle3	aagcgtgacGA	gtcacgcttAC	COC(=O)C1=CC(=CC(=C1)N)Cl	21961-31-9
Cycle3	tacacctgcGA	gcaggtgtaAC	NC1=C(I)C=CC=C1C(O)=O	20776-55-0
Cycle3	ctcatagccGA	ggctatgagAC	COC(=O)C1=CC(=C(O)C=C1)N	536-25-4
Cycle3	cggattctgGA	cagaatccgAC	CC(C)(C#N)C1=CC=C(N)C=N1	1226776-95-9
Cycle3	ctatcggcaGA	tgccgatagAC	CC(=O)NC1=NC(=CS1)C2=CC(=CC=C2)N	134812-30-9
Cycle3	agggatgtcGA	gacatccctAC	C[N]1C=C(N)C(=N1)C	64517-88-0
Cycle3	cgcctaattGA	aattaggcgAC	NC1=CC=C2N=COC2=C1	177492-52-3
Cycle3	cgaggtagaGA	tctacctcgAC	NC1=CC(=NO1)C2=CC=CC(=C2)Br	119162-52-6
Cycle3	aacctaccaGA	tggtaggttAC	NC1=CC=C(C=C1)N2CCCC2=O	13691-22-0
Cycle3	tctctgctaGA	tagcagagaAC	COC1=C(C=CC=C1)C2=CC=CC(=C2)N	96923-01-2
Cycle3	ccataccagGA	ctggtatggAC	CC1=CC=C(N)C(=C1)CO	34897-84-2
Cycle3	tatccgagaGA	tctcggataAC	NC1=CC=C(C=C1)C2(CCCC2)C#N	115279-73-7
Cycle3	tgctgagtcGA	gactcagcaAC	NC1=NN=C(Cl)C=C1Br	446273-59-2
Cycle3	aacggacatGA	atgtccgttAC	NC1=CC=C2[NH]C(=NC2=C1)CO	294656-36-3
Cycle3	gtggcatttGA	aaatgccacAC	CC1=C(Br)C=CC=C1N	55289-36-6
Cycle3	cgtgctatgGA	catagcacgAC	NC1=CC=C(C=C1)N2CCCCC2	2359-60-6
Cycle3	gagtacaccGA	ggtgtactcAC	COC1=NC=CC=C1N	20265-38-7
Cycle3	ggacatgttGA	aacatgtccAC	NC1=CN=CC(=C1)C#N	13600-47-0
Cycle3	cttaacggtGA	accgttaagAC	NC1=CC(=CN=C1C#N)Br	573675-27-1
Cycle3	agataccccGA	ggggtatctAC	NC1=CC=CC=C1C(=O)NC2=CC=C(Cl)C=C2	4943-86-6
Cycle3	tcatcagtgGA	cactgatgaAC	NC1=CN=C(Cl)C=C1Cl	7321-93-9
Cycle3	acaggatagGA	ctatcctgtAC	NC1=C(Br)C=NC=C1F	1214326-89-2
Cycle3	aagcatcacGA	gtgatgcttAC	CC1=C(N)C=CC(=N1)C(F)(F)F	383907-17-3
Cycle3	tctgccaaaGA	tttggcagaAC	CC1=C(N)N=CC(=C1)C#N	183428-91-3
Cycle3	agtctggtaGA	taccagactAC	NC1=CC(=NC(=C1)Br)Br	39771-34-1
Cycle3	gactctagtGA	actagagtcAC	CC1=C(N)N=CC=N1	19838-08-5
Cycle3	gatgagctcGA	gagctcatcAC	NC1=CN=C2C=CC=C[N]12	28036-33-1
Cycle3	cgcttatgaGA	tcataagcgAC	CC[N]1C=C2C=C(N)C=CC2=N1	5228-52-4
Cycle3	actgacactGA	agtgtcagtAC	CC1(C)OB(OC1(C)C)C2=CC(=C(N)C=C2)F	819058-34-9
Cycle3	gcgattgacGA	gtcaatcgcAC	NC1=NC=C(N=C1)C#N	113305-94-5
Cycle3	ctcctctgtGA	acagaggagAC	NC1=CC=CN=C1C#N	42242-11-5
Cycle3	tggtttcggGA	ccgaaaccaAC	CC1=C(I)C=CC(=N1)N	75073-11-9
Cycle3	gactgtactGA	agtacagtcAC	CN1C(=O)CC2=C1C=CC(=C2)N	20870-91-1
Cycle3	ggcctaatgGA	cattaggccAC	CC1=NN=C(N)C=C1	18591-82-7
Cycle3	ctgctaccaGA	tggtagcagAC	NC1=C[N]2C=CN=C2C=C1	235106-53-3
Cycle3	tgagagtacGA	gtactctcaAC	NC1=C[NH]N=C1	28466-26-4
Cycle3	cttgcctcaGA	tgaggcaagAC	COC(=O)C1=CC=C(C=C1N)N2CCOCC2	404010-84-0
Cycle3	tcggtgtttGA	aaacaccgaAC	C[S](=O)(=O)C1=CC=C(C=C1)C2=CSC(=N2)N	383131-95-1
Cycle3	acccgcataGA	tatgcgggtAC	NC1=NC2=C(CN(CC2)C(=O)OCC3=CC=CC=C3)S1	1141669-69-3
Cycle3	attgacggaGA	tccgtcaatAC	NC1=NC(=CS1)C2CC2	324579-90-0
Cycle3	ttgttggagGA	ctccaacaaAC	NC1=CC=CC(=C1)CN2CCCCC2	93138-55-7
Cycle3	gaacgaagtGA	acttcgttcAC	COC1=NC(=CN=C1)N	6905-47-1
Cycle3	ccgaaacttGA	aagtttcggAC	NC1=N[NH]C2=C1C=C(C=C2)C#N	20925-62-6
Cycle3	ccatcagacGA	gtctgatggAC	COC1=CC=CC=C1C2=CC=C(N)C=C2	263901-48-0
Cycle3	gctctactaGA	tagtagagcAC	NC1=NC(=CN=C1Cl)Br	1082843-72-8
Cycle3	cgtgtcgttGA	aacgacacgAC	NC1=CC=C2[N](CCO)N=CC2=C1	885270-96-2
Cycle3	gtatcatgcGA	gcatgatacAC	CC1(C)OB(OC1(C)C)C2=C(F)C=C(N)C=C2	819057-45-9
Cycle3	acctattcgGA	cgaataggtAC	NC1=CC(=CC=C1CO)Br	946122-05-0
Cycle3	aaagacgccGA	ggcgtctttAC	COC(=O)C1=CC=CC(=C1O)N	35748-34-6
Cycle3	ctagggagaGA	tctccctagAC	CC(C)(C)OC(=O)N1CCN(CC1)C2=CC=CC=C2N	170017-74-0
Cycle3	ccagtaaagGA	ctttactggAC	CC1=CC=CC=C1C2=CC=CC(=C2)N	400745-54-2
Cycle3	ttgaacaccGA	ggtgttcaaAC	C[S](=O)(=O)NC1=CC=C(N)C=C1	53250-82-1
Cycle3	gcttataccGA	ggtataagcAC	NC1=CC(=NO1)C2=CC=C(C=C2)C(F)(F)F	81465-84-1
Cycle3	ttcccttccGA	ggaagggaaAC	NC1=CC(=NO1)C2=CC=CC(=C2)F	119162-50-4
Cycle3	atctcgagcGA	gctcgagatAC	NC1=CC2=C(C=C1)C(=O)CC2	3470-54-0
Cycle3	atcgactcgGA	cgagtcgatAC	NC1=CC=CC(=C1)C2=CN=CO2	157837-31-5
Cycle3	gtcctatcgGA	cgataggacAC	NC1=CC2=C(NC(=O)C2)C=C1	20876-36-2
Cycle3	cggattatgGA	cataatccgAC	COC1=CC(=CC(=C1)N)F	2339-58-4
Cycle3	gacttgtggGA	ccacaagtcAC	NC1=CC(=CC=C1)[S](=O)(=O)NC2CC2	459434-39-0
Cycle3	attagtgggGA	cccactaatAC	NC1=CC=C(C=C1)[S](=O)(=O)NC2CC2	177785-41-0
Cycle3	acttgggttGA	aacccaagtAC	NC1=CC2=C(CCCC2O)C=C1	214698-03-0
Cycle3	accttggaaGA	ttccaaggtAC	C1=CC=C(C=C1)C2=CC=C(C=C2)CC(C(=O)O)N	76985-08-5
Cycle3	tttgagcgcGA	gcgctcaaaAC	NC1=CC=CC(=C1)C2=CC=CC=N2	15889-32-4
Cycle3	tggacctaaGA	ttaggtccaAC	NC1=CC=C(C=C1)C2=CN=CO2	1008-95-3
Cycle3	catgcttcgGA	cgaagcatgAC	CC1=NC=CC(=C1C)N	122475-57-4
Cycle3	caatggtggGA	ccaccattgAC	C[S](=O)(=O)C1=C(Cl)C=C(N)C=C1	23153-12-0
Cycle3	cgttcagacGA	gtctgaacgAC	C[S](=O)(=O)C1=CC=C(N)C=C1F	252561-34-5
Cycle3	gttgacgtgGA	cacgtcaacAC	NC1=CC(=CN=C1)C(N)=O	60524-14-3
Cycle3	gatacgacgGA	cgtcgtatcAC	CC1=CC(=CC=C1N)I	13194-68-8
Cycle3	atgaccctgGA	cagggtcatAC	NC1=N[NH]C=C1Br	16461-94-2
Cycle3	ttccgtccaGA	tggacggaaAC	C[S](=O)(=O)C1=CC=C(N)C(=C1)F	832755-13-2
Cycle3	cgctataggGA	cctatagcgAC	CC1=CC=C(N)C(=N1)Cl	39745-40-9
Cycle3	tggactagcGA	gctagtccaAC	NC1=CC=C2N=CC=NC2=C1Br	50358-63-9
Cycle3	agtccatgtGA	acatggactAC	CC(=O)C1=CC(=C(N)C(=C1)Cl)Cl	37148-48-4
Cycle3	gatcgtgtaGA	tacacgatcAC	CCOC(=O)C1=C(N)SC=C1	31891-06-2
Cycle3	gagagagatGA	atctctctcAC	NC1=CC(=CC=C1C#N)Br	304858-65-9
Cycle3	atcgcccaaGA	ttgggcgatAC	CC1=NC(=CC=C1N)Br	126325-47-1
Cycle3	tgtcaacctGA	aggttgacaAC	COC(=O)C1=C(N)C=CN=C1	16135-36-7
Cycle3	agcctaccaGA	tggtaggctAC	NC(CC1=CC=C(F)C=C1)C(O)=O	1132-68-9
Cycle3	ctcacgcaaGA	ttgcgtgagAC	CC(C)C(N)CO	16369-05-4
Cycle3	gttttcccgGA	cgggaaaacAC	CC(N)C1=CC=CN=C1	56129-55-6
Cycle3	attggcacaGA	tgtgccaatAC	NC(CCO)C(O)=O	1927-25-9
Cycle3	cctagctgtGA	acagctaggAC	CC(C)(N)C1=CC=CC=C1	585-32-0
Cycle3	ccggtagtaGA	tactaccggAC	CC(N)C1=CC=C(C)C=C1	586-70-9
Cycle3	gatcgcaaaGA	tttgcgatcAC	NC(CC1=CC=C(Cl)C=C1)C(O)=O	7424-00-2
Cycle3	aaccgtgtaGA	tacacggttAC	NC(CO)C1=CC=CC=C1	7568-92-5
Cycle3	acttcctgcGA	gcaggaagtAC	CC(N)CCO	2867-59-6
Cycle3	ctcaagctgGA	cagcttgagAC	NC(C(O)=O)C1=CC=C(F)C=C1	7292-73-1
Cycle3	ctgacgatgGA	catcgtcagAC	NC(CC(O)=O)C1=CC=C(Cl)C=C1	19947-39-8
Cycle3	attggtaggGA	cctaccaatAC	NC(CC(O)=O)C1=CC=CN=C1	62247-21-6
Cycle3	tcttcactcGA	gagtgaagaAC	Cl.COC(=O)C(N)CO	5619-04-05
Cycle3	taccagcaaGA	ttgctggtaAC	Cl.NC(CS)C(O)=O	10318-18-0
Cycle3	ccaatccacGA	gtggattggAC	Cl.COC(=O)C(N)CC1=CC=CC=C1	13033-84-6
Cycle3	ttccagccaGA	tggctggaaAC	Cl.COC(=O)C(N)C(C)C	6306-52-1
Cycle3	tgatccacgGA	cgtggatcaAC	Cl.CCOC(=O)CCC(N)C(=O)OCC	1118-89-4
Cycle3	aggcttatcGA	gataagcctAC	Cl.COC(=O)C(N)CC1=C[NH]C2=C1C=CC=C2	7524-52-9
Cycle3	tccatgagtGA	actcatggaAC	Cl.CCC(N)C(N)=O	7682-20-4
Cycle3	gttctgacaGA	tgtcagaacAC	Cl.NCCCCC(N)C(O)=O	70-53-1
Cycle3	tgggagagtGA	actctcccaAC	C	C
