# Supplementary material for: Diversified strategy for the synthesis of DNA-encoded oxindole libraries
Source: Royal Society of Chemistry journal article supplement (doi:10.1039/d0sc06696f), 2021-01-01
Supplement: d0sc06696f6.xlsx [file d0sc06696f6.xlsx]

## Sheet: Sheet1
			Smiles	CAS
Cycle1	ctcagcttaAG	taagctgagCA	Cl.NCCCCC(N)C(O)=O	70-53-1
Cycle1	cttaggctgAG	cagcctaagCA	Cl.NCCCCC(N)C(O)=O	5680-79-5
Cycle1	aagcggcttAG	aagccgcttCA	Cl.NCCCCC(N)C(O)=O	942-26-7
Cycle1	cacacagacAG	gtctgtgtgCA	Cl.NCCCCC(N)C(O)=O	5003-71-4
Cycle1	cacggcaatAG	attgccgtgCA	Cl.NCCCCC(N)C(O)=O	6276-54-6
Cycle1	cgtccttcaAG	tgaaggacgCA	NCC(CC1=CC=C(Cl)C=C1)C(O)=O	791615-75-3
Cycle1	ttcaacgccAG	ggcgttgaaCA	NCCCC(O)=O	56-12-2
Cycle1	gtcgagttcAG	gaactcgacCA	NCCCCCC(O)=O	60-32-2
Cycle1	tttcgcggaAG	tccgcgaaaCA	NCCC(O)=O	107-95-9
Cycle1	tgaccctaaAG	ttagggtcaCA	NCC1=CC=C(C=C1)C(O)=O	56-91-7
Cycle1	aaggcatagAG	ctatgccttCA	NCC1=CC=CC(=C1)Br	10269-01-9
Cycle1	cagccatagAG	ctatggctgCA	NCCC1=CC=C(Br)C=C1	73918-56-6
Cycle1	gaacgcagtAG	actgcgttcCA	NCC1=C(Br)C=CC=C1	3959-05-5
Cycle1	ccaaacttgAG	caagtttggCA	NCCC1=CC=CC(=C1)F	404-70-6
Cycle1	agcatgaacAG	gttcatgctCA	NCC1=CC=C(F)C=C1	140-75-0
Cycle1	cctatggcaAG	tgccataggCA	NCC1=C(F)C=CC=C1	89-99-6
Cycle1	gtagctcttAG	aagagctacCA	NCC1=CC=CC(=C1)F	100-82-3
Cycle1	ttgtgtagcAG	gctacacaaCA	NCC1=C(F)C=C(F)C=C1	72235-52-0
Cycle1	tgcatgcacAG	gtgcatgcaCA	NCC(O)C1=CC=CC=C1Cl	23496-56-2
Cycle1	ggtcttacaAG	tgtaagaccCA	NCC1=CC(=CC=C1Cl)Cl	10541-69-2
Cycle1	catcgtagtAG	actacgatgCA	NCCC1=CC=C(Cl)C=C1	156-41-2
Cycle1	gtaagatcgAG	cgatcttacCA	NCC1=CC=C(Cl)C=C1	104-86-9
Cycle1	caccaacacAG	gtgttggtgCA	NCCOC1=C(Cl)C=CC=C1	26378-53-0
Cycle1	ggttaggagAG	ctcctaaccCA	NCCC1=CC=CC=C1Cl	13078-80-3
Cycle1	tgcttggatAG	atccaagcaCA	NCC1=CC(=C(Cl)C=C1)Cl	102-49-8
Cycle1	aagcagagtAG	actctgcttCA	NCCC1=CC=C(O)C=C1	51-67-2
Cycle1	cagacgaatAG	attcgtctgCA	NCCC1=CC=CC=C1O	2039-66-9
Cycle1	ctatctaccAG	ggtagatagCA	NCC1=CC=CC=C1O	932-30-9
Cycle1	tggctttccAG	ggaaagccaCA	NCC#C	2450-71-7
Cycle1	gaagcaaagAG	ctttgcttcCA	NCC1=CC(=CC=C1)C#N	10406-24-3
Cycle1	acagtactcAG	gagtactgtCA	NCCC1=NN=N[NH]1	31602-64-9
Cycle1	ctatactggAG	ccagtatagCA	NCC1=N[NH]N=N1	31602-63-8
Cycle1	ccaagagctAG	agctcttggCA	NCC[N]1C=CC=N1	101395-71-5
Cycle1	taagtccctAG	agggacttaCA	C[N]1N=C(CN)C=C1C	423768-52-9
Cycle1	cccaaggatAG	atccttgggCA	NCC1=N[NH]C(=C1)C2=CC=CC=C2	936940-08-8
Cycle1	agaggaagaAG	tcttcctctCA	NCC1=CC=CC=C1[N]2C=CC=N2	449758-13-8
Cycle1	ggagcatttAG	aaatgctccCA	NCC1=CN=C(C=C1)[N]2C=CC=N2	956191-88-1
Cycle1	tcggatcacAG	gtgatccgaCA	NCC1=CC=NC=C1	3731-53-1
Cycle1	aggtctggtAG	accagacctCA	NCCC1=NC=CC=C1	2706-56-1
Cycle1	cgttctgtaAG	tacagaacgCA	NCC1=NC=CC=C1	3731-51-9
Cycle1	gaatggggaAG	tccccattcCA	NCC1=CC=C(N=C1)C(F)(F)F	387350-39-2
Cycle1	gatcgccttAG	aaggcgatcCA	C[N]1C=NC=C1CN	486414-86-2
Cycle1	tacctcttgAG	caagaggtaCA	NCC1=CC2=C(C=C1)N=CC=C2	99071-54-2
Cycle1	gagtcacgtAG	acgtgactcCA	NCC1=CC2=C([NH]C=C2)C=C1	81881-74-5
Cycle1	ttgtcggaaAG	ttccgacaaCA	NCCC1=C[NH]C2=CC=CC=C12	61-54-1
Cycle1	acaggtaacAG	gttacctgtCA	NCCC1=CC=CS1	30433-91-1
Cycle1	tttaagccgAG	cggcttaaaCA	NCC1=CC=CC(=C1)C2=NN=N[NH]2	765877-97-2
Cycle1	aagtcgtacAG	gtacgacttCA	NCC1=C2OC(F)(F)OC2=CC=C1	531508-46-0
Cycle1	aaaagcgtcAG	gacgcttttCA	NCCC1=NC2=CC=CC=C2[NH]1	29518-68-1
Cycle1	agtcatggtAG	accatgactCA	C1=COC(=C1)CN	617-89-0
Cycle1	cagttcaagAG	cttgaactgCA	NCC1=CN=CC=C1	3731-52-0
Cycle1	cagagtgatAG	atcactctgCA	CCNCCN	110-72-5
Cycle1	gttggtgttAG	aacaccaacCA	CC(C)(C)OC(=O)NCCCN	75178-96-0
Cycle1	cgattccgtAG	acggaatcgCA	CC(C)(C)OC(=O)NCCCCN	68076-36-8
Cycle1	cgctaaatcAG	gatttagcgCA	CC(C)(C)OC(=O)NCCN	57260-73-8
Cycle1	actgtgcatAG	atgcacagtCA	CN(CCN)C(=O)OC(C)(C)C	121492-06-6
Cycle1	catagcacgAG	cgtgctatgCA	C(CCN)CN	110-60-1
Cycle1	gtgctgatgAG	catcagcacCA	C1=CC=C(C(=C1)CN)N	4403-69-4
Cycle1	gggcctttaAG	taaaggcccCA	C1=CC(=CC(=C1)N)CN	4403-70-7
Cycle1	cagtctggaAG	tccagactgCA	CC(C)(C)OC(=O)CC1CC(CCN)OC(C)(C)O1	125995-13-3
Cycle1	ctgttgactAG	agtcaacagCA	CC(C)(CN)C(N)=O	324763-51-1
Cycle1	gaccaatccAG	ggattggtcCA	CC(C)(O)CN	2854-16-2
Cycle1	cgcttacatAG	atgtaagcgCA	NCC(F)(F)F	753-90-2
Cycle1	ccgtttacaAG	tgtaaacggCA	NCC(F)F	430-67-1
Cycle1	gtaacacgcAG	gcgtgttacCA	NCC(O)CO	616-30-8
Cycle1	cttctggtaAG	taccagaagCA	CCOC(CCCN)OCC	6346-09-4
Cycle1	accagttacAG	gtaactggtCA	COC(CN)OC	22483-09-6
Cycle1	agacaccagAG	ctggtgtctCA	CCOC(CN)OCC	645-36-3
Cycle1	cgaatgagtAG	actcattcgCA	CC(=O)NCCN	1001-53-2
Cycle1	tgaacgtctAG	agacgttcaCA	CN(C)CCN	108-00-9
Cycle1	cggaacatcAG	gatgttccgCA	NCCCCO	13325-10-5
Cycle1	agcagatgcAG	gcatctgctCA	NCCCCCCO	4048-33-3
Cycle1	gctctcgaaAG	ttcgagagcCA	NCCCO	156-87-6
Cycle1	aggaacctcAG	gaggttcctCA	NCCC[S](O)(=O)=O	3687-18-1
Cycle1	gccctaactAG	agttagggcCA	NCC[S](O)(=O)=O	107-35-7
Cycle1	acctcagacAG	gtctgaggtCA	CN1CCN(CC1)C2=CC(=CC=C2)CN	672325-37-0
Cycle1	acccgattgAG	caatcgggtCA	NCC1=CC(=CC=C1)N2CCCCC2	175696-71-6
Cycle1	tatgactccAG	ggagtcataCA	NCC1=CC(=CC=C1)CO	34231-22-6
Cycle1	catgaggtgAG	cacctcatgCA	NCC1=CC=CC(=C1)O	73604-31-6
Cycle1	cccagtatgAG	catactgggCA	CC1=CC=C(CN)C=C1C	102-48-7
Cycle1	gagttttccAG	ggaaaactcCA	CN(C)CCOC1=CC=C(CN)C=C1	20059-73-8
Cycle1	gggcttagtAG	actaagcccCA	COC1=CC=C(CN)C=C1	2393-23-9
Cycle1	cttcccgtaAG	tacgggaagCA	NCCOC1=CC=CC=C1	1758-46-9
Cycle1	tttgagcgtAG	acgctcaaaCA	NCCC1=CC=CC=C1	64-04-0
Cycle1	tgctctcgaAG	tcgagagcaCA	NCC1=CC=CC=C1CO	4152-92-5
Cycle1	cgcatgcatAG	atgcatgcgCA	NCC1=CC=CC=C1N2CCCC2	72752-53-5
Cycle1	cactgcgttAG	aacgcagtgCA	CN(C)CCOC1=C(CN)C=CC=C1	91215-97-3
Cycle1	gtttagtggAG	ccactaaacCA	C[S](=O)(=O)C1=CC=CC=C1CN	410545-65-2
Cycle1	accggcttaAG	taagccggtCA	NCC1=CC=CC=C1C(F)(F)F	3048-01-9
Cycle1	ctaacaaccAG	ggttgttagCA	COC1=C(OCCN)C=CC=C1	1836-62-0
Cycle1	gtcaacgttAG	aacgttgacCA	C1=CC=C(C=C1)CN	100-46-9
Cycle1	ctccgttgtAG	acaacggagCA	CCCCN	109-73-9
Cycle1	agttaaggcAG	gccttaactCA	C1=C(C=CC(=C1)C(F)(F)F)CN	3300-51-4
Cycle1	gaaacgtcgAG	cgacgtttcCA	NCC1CN(CCO1)CC2=CC=CC=C2	110859-47-7
Cycle1	ggtacagtaAG	tactgtaccCA	CC1=CC=CC(=C1)CN	100-81-2
Cycle1	tcacagcatAG	atgctgtgaCA	NCC1=CC=CC=C1N2CCCC2	72752-53-5
Cycle1	tacgactgtAG	acagtcgtaCA	NCC1=C2C=CC=CC2=CC=C1	118-31-0
Cycle1	gatcagggtAG	accctgatcCA	NCC1=CC=C(OC(F)(F)F)C=C1	93919-56-3
Cycle1	aaagcggttAG	aaccgctttCA	NCC1CC1	2516-47-4
Cycle1	caacacagtAG	actgtgttgCA	NCC1CCOCC1	130290-79-8
Cycle1	gagatacgtAG	acgtatctcCA	CC(=C)CN	2878-14-0
Cycle1	aaagtggggAG	ccccactttCA	Cl.Cl.COC(=O)C=1C=C(NN1)C=2C=CC=CC2CN	EN300-126496
Cycle1	gaccgaaatAG	atttcggtcCA	Cl.COC(=O)C=1C=C(CN)N2CCCCC12	EN300-1082123
Cycle1	acgatgcaaAG	ttgcatcgtCA	Cl.COC(=O)C1=NC(C)=C(CN)O1	EN300-264442
Cycle1	tggtgttctAG	agaacaccaCA	Cl.COC(=O)C=1N=COC1CN	EN300-366520
Cycle1	aagcttcctAG	aggaagcttCA	Cl.COC(=O)C1=COC(CN)=N1	EN300-257231
Cycle1	cgttgtgtcAG	gacacaacgCA	Cl.COC(=O)C=1C=C(CN)OC1C	EN300-35594
Cycle1	ggcgatattAG	aatatcgccCA	Cl.COC(=O)C1=CN(CCN)N=N1	EN300-197475
Cycle1	ttaggaggtAG	acctcctaaCA	Cl.CCOC(=O)C=1SC=2C=CSC2C1CN	EN300-71879
Cycle1	catatccacAG	gtggatatgCA	Cl.CCOC(=O)CSC(CN)C(F)(F)F	EN300-349314
Cycle1	cgcagtagtAG	actactgcgCA	Cl.Cl.NCC=1C=C(Cl)C=2C=CC=NC2C1O	EN300-258669
Cycle1	aacatcctgAG	caggatgttCA	Cl.CC=1SC(CN)=NC1C=2C=CC(Cl)=CC2	EN300-40385
Cycle1	tagcaccagAG	ctggtgctaCA	Cl.NCC1=NSC=2C=CC(Cl)=CC12	EN300-741864
Cycle1	gcatttcggAG	ccgaaatgcCA	Cl.Cl.NCC1=NN=C2C(Cl)=CC=CN12	EN300-310438
Cycle1	gaactaggtAG	acctagttcCA	Cl.Cl.NCC=1N=C2C=CC=CN2C1Cl	EN300-1073064
Cycle1	gtgcatgacAG	gtcatgcacCA	Cl.NCCC=1C=C(Cl)C=2OCCOC2C1	EN300-24359
Cycle1	gtcgatggaAG	tccatcgacCA	Cl.Cl.NCC=1C(F)=CC=C2NC=NC12	EN300-332874
Cycle1	acaatagcgAG	cgctattgtCA	Cl.Cl.CN1C(CCN)=NC=2C=C(F)C=CC12	EN300-72279
Cycle1	aaagctgcgAG	cgcagctttCA	Cl.NCC(F)(F)C=1C=C(F)C=C(F)C1	EN300-374205
Cycle1	atgagactcAG	gagtctcatCA	Cl.Cl.NCC1=NC=2N=CC(Br)=CC2N1	EN300-88380
Cycle1	gagcagacaAG	tgtctgctcCA	Cl.COC1=NSC(CN)=C1Br	EN300-312809
Cycle1	gaaaatgggAG	cccattttcCA	Cl.CC=1N=NC(O)=C(CN)C1C	EN300-73125
Cycle1	aagcgacaaAG	ttgtcgcttCA	Cl.NCC=1C=C2CCCCC2=NC1O	EN300-342596
Cycle1	cacttggtaAG	taccaagtgCA	Cl.NCCC1=NN=C(S)O1	EN300-142136
Cycle1	aaagtccgcAG	gcggactttCA	Cl.NCC#CC=1C=CC=CC1	EN300-26681
Cycle1	ttacctggaAG	tccaggtaaCA	Cl.NCCN1C=NC(C#N)=N1	EN300-210104
Cycle1	tgaacacgtAG	acgtgttcaCA	Br.NCCCSC#N	EN300-201896
Cycle1	cgaacacaaAG	ttgtgttcgCA	Cl.NCCN=[N+]=[N-]	EN300-102102
Cycle1	cttggacgaAG	tcgtccaagCA	Cl.CN1C=C(CCN)C=2C=CC=CC12	EN300-139143
Cycle1	ctgtttctgAG	cagaaacagCA	Cl.CC1=NOC(CN)C1	EN300-245501
Cycle1	gaggcacatAG	atgtgcctcCA	Cl.Cl.NCC1(CC1)N2C=CC=N2	EN300-746318
Cycle1	acaattgcgAG	cgcaattgtCA	Cl.Cl.CC(C)(CN)N1C=CN=C1	EN300-305564
Cycle1	gtatccgatAG	atcggatacCA	Cl.Cl.CN1N=C(CN)CC1=O	EN300-194293
Cycle1	ggtttgtacAG	gtacaaaccCA	Cl.Cl.CN1CCN=C1CN	EN300-365890
Cycle1	tatccccttAG	aaggggataCA	Cl.NCCN1C=C(C=CC1=O)C(F)(F)F	EN300-127044
Cycle1	caggtctcaAG	tgagacctgCA	Cl.Cl.Cl.CN1C=CC(=O)N(CCCN)C1=O.CN1C=CC(=O)N(CCCN)C1=O	EN300-185771
Cycle1	gtcttcaagAG	cttgaagacCA	Cl.NCCCN1C=NNC1=O	EN300-267004
Cycle1	agcagtcagAG	ctgactgctCA	Cl.Cl.CC1=CN=CN1CCCN	EN300-113698
Cycle1	gtgtctccaAG	tggagacacCA	Cl.Cl.CCN(C1CC1)C(=O)CN2C=NC(CN)=N2	EN300-184393
Cycle1	accctactaAG	tagtagggtCA	Cl.Cl.NCCC1=NN=C2C(=O)NCCN12	EN300-386262
Cycle1	gtcgggattAG	aatcccgacCA	Cl.Cl.CCSC1=NN=C(CN)N1C	EN300-129425
Cycle1	cgctgtgatAG	atcacagcgCA	Cl.Cl.NCC1=NN=C2CC(CCN12)C(F)(F)F	EN300-386186
Cycle1	gtttctgtcAG	gacagaaacCA	Cl.Cl.NCC1=NN=C2CCC(CN12)C(F)(F)F	EN300-109762
Cycle1	ttggcctctAG	agaggccaaCA	Cl.Cl.CN1[C@@H]([C@@H](CN)CC1=O)C2=NC=CN2C |&1:4,5,r|	EN300-249220
Cycle1	gcgcaagaaAG	ttcttgcgcCA	Cl.Cl.CN1C=CN=C1C(O)(CN)C(F)(F)F	EN300-53416
Cycle1	ggtagctaaAG	ttagctaccCA	Cl.NCC1=CSC2=NC=CN12	EN300-178133
Cycle1	agatcagcaAG	tgctgatctCA	Cl.Cl.NCC=1C=NC2=NC=CN2C1	EN300-220378
Cycle1	caatctggaAG	tccagattgCA	Cl.Cl.NCCC1=CN2CCCC2=N1	EN300-141533
Cycle1	aggcaatgcAG	gcattgcctCA	Cl.Cl.CN1C=C(CN)N=C1C=2C=CC=CC2	EN300-1166006
Cycle1	ttgggtaacAG	gttacccaaCA	Cl.NCC1=CN2CCSC2=N1	EN300-183684
Cycle1	cggtccttaAG	taaggaccgCA	Cl.Cl.CC(C)C=1N=C(CCN)N(C)N1	EN300-395399
Cycle1	gctaagtgcAG	gcacttagcCA	Cl.NCC=1N=C2N=CC=CN2N1	EN300-250416
Cycle1	aggggtgatAG	atcacccctCA	Cl.Cl.NCC1=NC(=CS1)C=2N=NNN2	EN300-1086911
Cycle1	tggacctgaAG	tcaggtccaCA	Cl.Cl.CN1C=CC(=N1)C2=NC(CN)=CS2	EN300-392636
Cycle1	catacatcgAG	cgatgtatgCA	Cl.Cl.CC(C)N1C=NN=C1CN	EN300-69979
Cycle1	tcaacccctAG	aggggttgaCA	Cl.Cl.NCC1=NN=CS1	EN300-344922
Cycle1	tttctctcgAG	cgagagaaaCA	Cl.Cl.NCC(O)C1=CN=CS1	EN300-384159
Cycle1	actgtctacAG	gtagacagtCA	Cl.NCCC=1C=CC(=CC1)N2C=CC=N2	EN300-26173
Cycle1	tggggctttAG	aaagccccaCA	Cl.NCC=1C=CC(=CN1)N2C=NC=N2	EN300-199145
Cycle1	tcgcctagaAG	tctaggcgaCA	Cl.NCCC1=NN=C(N1)C2=CC=CO2	EN300-70695
Cycle1	cacaatcggAG	ccgattgtgCA	Cl.NCCC1=NN=C(O1)C=2C=CC=CC2	EN300-102219
Cycle1	gtcggacaaAG	ttgtccgacCA	Cl.Cl.NCC1=NC(CN2CCCCC2)=NO1	EN300-200092
Cycle1	gcgactgatAG	atcagtcgcCA	Cl.NCC1=NC(CC=2C=CC=CC2F)=NO1	EN300-378589
Cycle1	cctccagttAG	aactggaggCA	Cl.NCCC1=NOC(=N1)C=2C=CC=CN2	EN300-72701
Cycle1	cagaacactAG	agtgttctgCA	Cl.CC1=NC(=NN1)C=2C=CC=C(CN)C2	EN300-84731
Cycle1	tcataggcgAG	cgcctatgaCA	Cl.Cl.NCCC=1C=C(NN1)C=2C=CN=CC2	EN300-153883
Cycle1	tgcgagcatAG	atgctcgcaCA	Cl.Cl.CC=1N=CNC1CCN	EN300-82322
Cycle1	accccaaaaAG	ttttggggtCA	Cl.NCCCC=1N=CNN1	EN300-196614
Cycle1	ggccatatgAG	catatggccCA	Cl.Cl.NCC1=NNC=NC1=O	EN300-125916
Cycle1	ggagcgtttAG	aaacgctccCA	Cl.Cl.NCCCOC=1N=CC=CN1	EN300-195914
Cycle1	catgttgacAG	gtcaacatgCA	Cl.Cl.NCCC(=O)NC1=NC=CN1	EN300-253365
Cycle1	gctcacacaAG	tgtgtgagcCA	Cl.NCCC=1C=CNC1	EN300-188099
Cycle1	aggccgattAG	aatcggcctCA	Cl.Cl.CC1=NC(CCN)=CN1	EN300-716281
Cycle1	cgcgtttagAG	ctaaacgcgCA	Cl.CC=1C=C(CCN)ON1	EN300-211233
Cycle1	tacatgaggAG	cctcatgtaCA	Cl.NCCC1=NNC(=O)N1	EN300-96544
Cycle1	ggttattccAG	ggaataaccCA	Cl.NCCC1=NC(=O)ON1	EN300-189425
Cycle1	atgcgaaccAG	ggttcgcatCA	Cl.NCCC1=CSC(=O)N1	EN300-174264
Cycle1	acctgttcgAG	cgaacaggtCA	Cl.NCCCC1=NC(=O)NN1	EN300-96538
Cycle1	ggctttgaaAG	ttcaaagccCA	Cl.Cl.NCCC1=CC(=O)NN1	EN300-113235
Cycle1	taaacgaccAG	ggtcgtttaCA	Cl.Cl.NCC1=CC(=O)C=CN1	EN300-254272
Cycle1	cctgaaagcAG	gctttcaggCA	Cl.CSC1=NC(=O)C=C(CN)N1	EN300-269964
Cycle1	tgggattgcAG	gcaatcccaCA	Cl.Cl.CC1=CNC(CN)=C(C)C1=O	EN300-746345
Cycle1	cttgcatgaAG	tcatgcaagCA	Cl.CC1=CC(C)=C(CN)C(=O)N1	EN300-14701
Cycle1	gaagcctcaAG	tgaggcttcCA	Cl.CCC1=NNC(=O)C(CN)=C1CC	EN300-108860
Cycle1	actcccaacAG	gttgggagtCA	Cl.NCC1=NC=2CCOCC2C(=O)N1	EN300-358945
Cycle1	tgtgctaccAG	ggtagcacaCA	Cl.NCC1=NNC(=O)N1C2CC2	EN300-258286
Cycle1	ccgtcctatAG	ataggacggCA	Cl.CN1C(CN)=CC(=O)N(C)C1=O	EN300-93274
Cycle1	actcctgcaAG	tgcaggagtCA	Br.Br.CN1C=C(O)C(=O)C=C1CN	EN300-100963
Cycle1	tatctggccAG	ggccagataCA	Cl.Cl.NCC1=CC(=O)NC(=N1)C2CCC2	EN300-343363
Cycle1	atgcgctgaAG	tcagcgcatCA	Cl.Cl.CC1=NNC(=N1)[C@@H]2CC[C@H](CN)O2 |&1:8,11,r|	EN300-755323
Cycle1	ctagtctacAG	gtagactagCA	Cl.Cl.NCCCC1=NC(=NN1)C2CC2	EN300-73917
Cycle1	cataccgatAG	atcggtatgCA	Cl.CC(CN)C1=NN=NN1	EN300-135904
Cycle1	tgacgtgcaAG	tgcacgtcaCA	Cl.CC(CN)C=1N=CON1	EN300-706048
Cycle1	ccactggatAG	atccagtggCA	Cl.NCCOCC(=O)NCC1=NN=NN1	EN300-113533
Cycle1	catctatccAG	ggatagatgCA	Cl.Cl.NCCC1=NN=C(N1)C2CCOCC2	EN300-366854
Cycle1	caagccgtaAG	tacggcttgCA	Cl.Cl.CN1CCOCC1C2=NN=C(CN)N2	EN300-658810
Cycle1	gcttagtcaAG	tgactaagcCA	Cl.CS(=O)(=O)CC1=NN=C(CN)N1	EN300-637483
Cycle1	gtgtggatcAG	gatccacacCA	Cl.Cl.NCC1=NC=2C=CC=NC2N1	EN300-172605
Cycle1	gtcactggaAG	tccagtgacCA	Cl.CC1=CC=2C(CCN)=CSC2S1	EN300-736130
Cycle1	cataccacgAG	cgtggtatgCA	Cl.CC1=CC(CCN)=C(C)S1	EN300-76225
Cycle1	ctcactaacAG	gttagtgagCA	Cl.CC1=CC(CCN)=C(C)N1C=2C=CC=CC2	EN300-15172
Cycle1	gttatacggAG	ccgtataacCA	Cl.CSC1=NSC(SC)=C1CN	EN300-762789
Cycle1	acagagtagAG	ctactctgtCA	Cl.CCN1N=C(C)C(CN)=N1	EN300-257784
Cycle1	gtatgcagtAG	actgcatacCA	Cl.Cl.CCC1=NN(CC=2C=CC=CC2)C(CC)=C1CN	EN300-249959
Cycle1	cacaatgccAG	ggcattgtgCA	Cl.Cl.NCC1CCN2N=CC(C(=O)N)=C2C1	EN300-158593
Cycle1	gccatgtgtAG	acacatggcCA	Cl.Cl.NCC1=CN(CC2CCOC2)N=N1	EN300-344639
Cycle1	gagacggatAG	atccgtctcCA	Cl.Cl.CC=1C=C(C)N2N=C(CCCN)C=C2N1	EN300-44195
Cycle1	cagatcagtAG	actgatctgCA	Cl.Cl.CC1=NC2=CC(=O)NN2C(C)=C1CN	EN300-77333
Cycle1	accttcaagAG	cttgaaggtCA	Cl.Cl.CC1=CN2C(CN)=C(C)N=C2S1	EN300-225070
Cycle1	cctctcgtaAG	tacgagaggCA	Cl.CCN(CC)S(=O)(=O)C1=CC=C(CN)S1	EN300-25416
Cycle1	cacgttagcAG	gctaacgtgCA	Cl.NCC1=CS(=O)(=O)C=2C=CC=CC12	EN300-172685
Cycle1	tgtgtagggAG	ccctacacaCA	Cl.CC=1NC(=O)SC1S(=O)(=O)NCCN	EN300-122834
Cycle1	cacggtattAG	aataccgtgCA	Cl.NCCNS(=O)(=O)C1=CC=CC2=NON=C12	EN300-186740
Cycle1	ttgcgtactAG	agtacgcaaCA	Cl.CC=1N=CSC1C(=O)NCCN	EN300-63453
Cycle1	tggcatacgAG	cgtatgccaCA	Cl.NCCNC(=O)C=1NN=C2C=CC=CC12	EN300-61733
Cycle1	ttaagctcgAG	cgagcttaaCA	Cl.NCCN1C(=O)C=2C=CC=CC2C1=O	EN300-52248
Cycle1	gacctctaaAG	ttagaggtcCA	Cl.NCCN1C=2C=CC=CC2NS1(=O)=O	EN300-141919
Cycle1	cgtgaacttAG	aagttcacgCA	Cl.NCCC1(O)C(=O)NC=2C=CC=CC21	EN300-85538
Cycle1	ggtgaagctAG	agcttcaccCA	Cl.Cl.NCCN1C=NC=2C=CC=CC12	EN300-50263
Cycle1	tctggtatgAG	cataccagaCA	Cl.NCCN1C=2C=CC=CC2C=3C=CC=CC13	EN300-69055
Cycle1	catcttacgAG	cgtaagatgCA	Cl.NCCN1C(=O)NC=2C=CC=CC12	EN300-101204
Cycle1	cagtactcaAG	tgagtactgCA	Cl.NCCC1=NOC=2C=CC=CC12	EN300-269456
Cycle1	atcgtacacAG	gtgtacgatCA	Cl.NCCC1=NN=C2C=CC=CN12	EN300-13519
Cycle1	tttcacaggAG	cctgtgaaaCA	Cl.Cl.NCC1=CC=CN2N=CN=C12	EN300-747000
Cycle1	tactactccAG	ggagtagtaCA	Cl.NCCN1N=C2C=CC=CN2C1=O	EN300-51704
Cycle1	tggctgtttAG	aaacagccaCA	Cl.NCCC=1C=C2C=CC=CN2C1	EN300-302005
Cycle1	gttaccagaAG	tctggtaacCA	Cl.NCC=1C=CC=2C(=O)C=CNC2C1	EN300-177137
Cycle1	ttggtgcttAG	aagcaccaaCA	Cl.Cl.CC(C)N1C=NC=2C=CC(CN)=CC12	EN300-372037
Cycle1	tcgtcatctAG	agatgacgaCA	Cl.C[C@@H]1[C@H](CN)OC=2C=CC=CC12 |&1:2,3,r|	EN300-367247
Cycle1	cgggcaaaaAG	ttttgcccgCA	Cl.Cl.NC[C@@H]1CCCO[C@H]1C2=CC=NN2 |&1:4,9,r|	EN300-343384
Cycle1	tcggtaaccAG	ggttaccgaCA	Cl.Cl.CC1=NN=C(O1)N2C[C@@H](F)C[C@H]2CN	EN300-207651
Cycle1	cagggctttAG	aaagccctgCA	Cl.Cl.NCC1CCCN(C1)C2=NC=3N=CC=CC3O2	EN300-762658
Cycle1	gcatagggtAG	accctatgcCA	Cl.Cl.CN1N=CC=2C(=NC=NC12)N3CCCCC3CN	EN300-179221
Cycle1	tcgatgtacAG	gtacatcgaCA	Cl.Cl.NCC1CN(CCO1)C=2N=CN=C3NC=NC23	EN300-111449
Cycle1	ctacctgtcAG	gacaggtagCA	Cl.NC[C@@]12OCCC[C@H]2C1(F)F |&1:3,8,r|	EN300-303800
Cycle1	aaagggcatAG	atgccctttCA	Cl.NCC1CCS(=O)(=O)N1	EN300-1266316
Cycle1	tagtccgaaAG	ttcggactaCA	Cl.NCC1CS(=O)(=O)CCO1	EN300-124213
Cycle1	aggttggtgAG	caccaacctCA	Cl.NCC1CCCS1(=O)=O	EN300-110419
Cycle1	attgagctgAG	cagctcaatCA	Cl.Cl.NCCN1CCS(=O)(=O)CC1	EN300-37179
Cycle1	agtcaaagcAG	gctttgactCA	Cl.CC1(C)OCC(CN)O1	EN300-107033
Cycle1	aggttgtacAG	gtacaacctCA	Cl.Cl.CC1CC(CN)CC(=O)N1	EN300-305473
Cycle1	acaccagtcAG	gactggtgtCA	Cl.NCC1OC(=O)CC21CCC2	EN300-1068229
Cycle1	gttacacgaAG	tcgtgtaacCA	Cl.NCC1CC2(CCC2)C(=O)O1	EN300-178879
Cycle1	gagtcaacaAG	tgttgactcCA	Cl.NCC1CCCC21NC(=O)NC2=O	EN300-96574
Cycle1	aagacggatAG	atccgtcttCA	Cl.C[C@H]1CC[C@@](C)(CN)C1(C)C	EN300-300946
Cycle1	tcatcacgcAG	gcgtgatgaCA	Cl.CC1(CN)CCC(=O)N1	EN300-250767
Cycle1	atgtagggtAG	accctacatCA	Cl.CC1(CN)N=N1	EN300-224744
Cycle1	cgaattgtcAG	gacaattcgCA	Cl.CC1(C)CC(=NO1)CN	EN300-245780
Cycle1	gaaggctatAG	atagccttcCA	Cl.COC=1C=C(NC(=O)CN)C=C(OC)C1	EN300-101129
Cycle1	aagtccgtaAG	tacggacttCA	Cl.NCC(=O)N1CCCC1	EN300-26664
Cycle1	tcctgttgaAG	tcaacaggaCA	Cl.CNC(=O)C1CCCN1C(=O)CN	EN300-68650
Cycle1	gttcatcgtAG	acgatgaacCA	Cl.CN1C(=O)N(CCCN)C(=O)C1=O	EN300-65562
Cycle1	tcgtacgtgAG	cacgtacgaCA	Cl.CC1(C)NC(=O)N(CCN)C1=O	EN300-124268
Cycle1	cttaccctaAG	tagggtaagCA	Cl.NCCCN1C(=O)NC(C1=O)C=2C=CC=CC2	EN300-311455
Cycle1	tcggatgacAG	gtcatccgaCA	Cl.NCCN1C(=O)SC(=CC=2C=CC=CC2)C1=O	EN300-34028
Cycle1	agttgcatgAG	catgcaactCA	Cl.NCC12COC(=O)N2CCOC1	EN300-345252
Cycle1	ctggaatgaAG	tcattccagCA	Cl.Cl.NCC12CCCN2CCC1	EN300-121037
Cycle1	cttacgcgaAG	tcgcgtaagCA	Cl.CCOP(=O)(O)CCCN	EN300-111343
Cycle1	gctaccactAG	agtggtagcCA	Cl.NCCNC(=O)C1=CC=CO1	EN300-28769
Cycle1	agtgaggctAG	agcctcactCA	Cl.Cl.NCCCC1=NC=2CCCCC2N1	EN300-365506
Cycle1	caaacagcaAG	tgctgtttgCA	Cl.CN(CCO)S(=O)(=O)C=1C=CC=CC1CN	EN300-75866
Cycle1	cgtcaccaaAG	ttggtgacgCA	Cl.CC(C)NS(=O)(=O)CC=1C=CC=CC1CN	EN300-24169
Cycle1	catgcagatAG	atctgcatgCA	Cl.CC=1C=CC(C)=C(C1)S(=O)(=O)NCCN	EN300-31945
Cycle1	agtgactacAG	gtagtcactCA	Cl.NCC1CNC(=O)C=2C=CC=CC12	EN300-269923
Cycle1	atgcctatcAG	gataggcatCA	Cl.NC[C@H](O)[C@H]1OC(=O)C(=C1O)O	EN300-332492
Cycle1	cacatgtccAG	ggacatgtgCA	Cl.NCCN1CC2CCCCN2C1=O	EN300-305286
Cycle1	acataggggAG	cccctatgtCA	COC=1C=C(Cl)C(C)=CC1NC(=O)CCN	EN300-98654
Cycle1	gcggatttcAG	gaaatccgcCA	CCS(=O)(=O)C=1C=C(Cl)C=C(CN)C1	EN300-253328
Cycle1	cgtctgaacAG	gttcagacgCA	CC1=C(CN)SC=2C=CC(Cl)=CC12	EN300-198685
Cycle1	tgttctggcAG	gccagaacaCA	NCCC=1C=NC2=C(Cl)C=NN2C1	EN300-226120
Cycle1	gtgactagaAG	tctagtcacCA	CC=1C=CC(CN)=C(N1)N2C=C(Cl)C=N2	EN300-171955
Cycle1	cgccaaactAG	agtttggcgCA	CN1C(CN)=NC=2C=CC=C(Cl)C12	EN300-142107
Cycle1	aacccctagAG	ctaggggttCA	CC=1C=C(Br)C=C2C=C(CN)OC12	EN300-125133
Cycle1	caggcagaaAG	ttctgcctgCA	NCC=1C=NC(Br)=CN1	EN300-124273
Cycle1	agtcggtacAG	gtaccgactCA	CN1C=C(Br)C=C1CN	EN300-97198
Cycle1	cgacgttagAG	ctaacgtcgCA	CC1=CC(Br)=CN2C=C(CN)N=C12	EN300-135477
Cycle1	gtctagaacAG	gttctagacCA	CN1C(=CC=2C=CC=CC12)C(=O)NCCN	EN300-186737
Cycle1	ctttgtcgtAG	acgacaaagCA	CC(O)(CN)C1=CC=CO1	EN300-86013
Cycle1	atggttaccAG	ggtaaccatCA	CC1=CC(=C(C)O1)C(C)(O)CN	EN300-84621
Cycle1	catcgtcatAG	atgacgatgCA	NCC1(CC1)C2=CCOCC2	EN300-818704
Cycle1	ggaaccgatAG	atcggttccCA	CC=1C=C(CN)C=C2C1NC(=O)C2(C)C	EN300-370795
Cycle1	caggcttgaAG	tcaagcctgCA	NCC1=CC=C(CN2CCOCC2)O1	EN300-135175
Cycle1	tcgcacatcAG	gatgtgcgaCA	CC=1N=C(CN2CCC(CN)CC2)OC1C	EN300-74952
Cycle1	tcacaacacAG	gtgttgtgaCA	CN1CCC(CN)C=2C=CC=CC12	EN300-43478
Cycle1	atcggattgAG	caatccgatCA	CC1(CN)COC=2C=CC=CC2O1	EN300-90144
Cycle1	acgctgacaAG	tgtcagcgtCA	NCC=1C=CN=CC1OCCC(F)(F)F	EN300-215688
Cycle1	agccacagtAG	actgtggctCA	CN(C)C=1N=CC=C(N1)N2C[C@@H](F)C[C@H]2CN	EN300-159542
Cycle1	ggcattcgtAG	acgaatgccCA	CC(C)(C)C=1N=CC=C(CCCN)N1	EN300-128376
Cycle1	tcatcaaggAG	ccttgatgaCA	CC=1C=CC(=CC1)C2=NC(CCN)=CO2	EN300-62194
Cycle1	atgctcctaAG	taggagcatCA	CN(C(=O)C=1C=CN=CC1)C=2C=CC(CN)=CC2	EN300-81537
Cycle1	cggaattgaAG	tcaattccgCA	NCC=1C=NN(C1C(F)(F)F)C=2C=CC=CC2	EN300-136381
Cycle1	gccttacttAG	aagtaaggcCA	CC(C)C1=NN(C=C1CN)C=2C=CC=CC2	EN300-88891
Cycle1	tgaaggcatAG	atgccttcaCA	CC1=NC=C(CN)N1C=2C=CC=CC2	EN300-80676
Cycle1	gtccatatcAG	gatatggacCA	NCCC1=NC=C(N1)C=2C=CC=CC2	EN300-59880
Cycle1	cgatcaccaAG	tggtgatcgCA	CC(CN)C1=NC(=NO1)C=2C=CC=CC2	EN300-119969
Cycle1	agaagctggAG	ccagcttctCA	NCC1=CC(=NS1)C=2C=CC=CC2	EN300-322542
Cycle1	acatgggagAG	ctcccatgtCA	NCC1=CSC(CNC(=O)C=2C=CC=CC2)=N1	EN300-100070
Cycle1	tctagcacaAG	tgtgctagaCA	COCC1=NC(CN)=C(S1)C=2C=CC=CC2	EN300-196730
Cycle1	agctgttgtAG	acaacagctCA	CC=1C=C(CN)N=C(N1)N2CCCC2	EN300-217662
Cycle1	ttagagggtAG	accctctaaCA	CC=1C=C(CN)N=CN1	EN300-78468
Cycle1	attcgtcgtAG	acgacgaatCA	COC=1C=C(OC)N=C(CN)N1	EN300-260056
Cycle1	atttgccgtAG	acggcaaatCA	CC(C)(C)C1=CN=C(CN)O1	EN300-97364
Cycle1	actgagtgaAG	tcactcagtCA	CS(=O)(=O)CC=1N=CC(CN)=CN1	EN300-119168
Cycle1	cagaagcgtAG	acgcttctgCA	CC(C)(C)N1N=NC(CN)=N1	EN300-266803
Cycle1	cattccctcAG	gagggaatgCA	CC(C)(C)N1N=CN=C1CN	EN300-191983
Cycle1	ggaatccaaAG	ttggattccCA	COCC=1NN=NC1CN	EN300-225588
Cycle1	tttggccacAG	gtggccaaaCA	CC1=NON=C1CN	EN300-79538
Cycle1	ctccctactAG	agtagggagCA	CC(C)C1=NOC=C1CN	EN300-1067448
Cycle1	gctatgttgAG	caacatagcCA	CC=1SC=C(CN)C1C	EN300-260084
Cycle1	tcgccatgtAG	acatggcgaCA	CC1=NC(C)=C(CCN)S1	EN300-72582
Cycle1	ttgtgcatcAG	gatgcacaaCA	CC1=CC=NN1CCN	EN300-230171
Cycle1	taccatggtAG	accatggtaCA	NCCN1C=CSC1=O	EN300-263300
Cycle1	aagcagtagAG	ctactgcttCA	CC1=NC=CN1CCN	EN300-60978
Cycle1	cacgttgcaAG	tgcaacgtgCA	NCCN1C=CC=C1	EN300-85061
Cycle1	gtgtctacaAG	tgtagacacCA	CC1=CC=CC(=O)N1CCCCN	EN300-66688
Cycle1	acttgcgaaAG	ttcgcaagtCA	CN1C=CC=C1CCN	EN300-131971
Cycle1	actaccctgAG	cagggtagtCA	CN1C=C(C=C1C(=O)N)S(=O)(=O)NCCN	EN300-31175
Cycle1	ccatgatctAG	agatcatggCA	CN1C=CC(CCN)=N1	EN300-120916
Cycle1	tcgagggtaAG	taccctcgaCA	CN1C=NC(CCN)=C1	EN300-116916
Cycle1	caagttggtAG	accaacttgCA	CCCN1C=CC(CN)=C1	EN300-176702
Cycle1	acgatcgtcAG	gacgatcgtCA	NCC=1C=CN(CC=2C=CC=CC2)N1	EN300-206102
Cycle1	tagggatgaAG	tcatccctaCA	NCC=1C=CC2=CN=CN2C1	EN300-205668
Cycle1	agagacaggAG	cctgtctctCA	CCN1N=NC=C1CN	EN300-314838
Cycle1	gatacccgaAG	tcgggtatcCA	NCC1=CC=NN1C2CCCC2	EN300-762896
Cycle1	gtcaagactAG	agtcttgacCA	NCC(N1C=NC=N1)C(F)(F)F	EN300-341820
Cycle1	aatgcgactAG	agtcgcattCA	CC(CN)N1C=CC=N1	EN300-231888
Cycle1	tcgaatgcaAG	tgcattcgaCA	CC1=NC=2C(CN)=CC=NC2N1	EN300-261679
Cycle1	taacgccgaAG	tcggcgttaCA	CN(C)C=1C=C(CN)C=2C=CC=CC2N1	EN300-95798
Cycle1	tggaacgagAG	ctcgttccaCA	CN1C(CN)=NC=2C=CC=CC2C1=O	EN300-127118
Cycle1	gctttagtcAG	gactaaagcCA	CC=1N=C2C=C(CN)C=CN2C1C	EN300-201403
Cycle1	tgcgacactAG	agtgtcgcaCA	CN1N=CC=2C(=O)NC(CN)=NC12	EN300-333063
Cycle1	atcagcacaAG	tgtgctgatCA	CC=1N=C2N(C)NC(=O)C2=C(C)C1CN	EN300-74805
Cycle1	gggttagaaAG	ttctaacccCA	CC1(C)CCC=2SC(CN)=CC2C1	EN300-99918
Cycle1	tgtgattcgAG	cgaatcacaCA	CC1(C)CCC=2ON=C(CN)C2C1	EN300-328615
Cycle1	agagtagctAG	agctactctCA	NCCSC=1NN=CC1[N+](=O)[O-]	EN300-229540
Cycle1	agcattgagAG	ctcaatgctCA	CC=1NN=CC1CCCN	EN300-28612
Cycle1	taacgagtcAG	gactcgttaCA	CC(C)C=1C=C(NN1)C(F)(F)CN	EN300-211096
Cycle1	cgaagactgAG	cagtcttcgCA	CC1=NNC(=N1)C(F)(F)CN	EN300-219901
Cycle1	tggctatccAG	ggatagccaCA	NCC(F)(F)C1=NNC=2CCCC12	EN300-211093
Cycle1	gcaacgagtAG	actcgttgcCA	NCCCN1N=C(C=2CCCC21)C(F)(F)F	EN300-230818
Cycle1	aacacggttAG	aaccgtgttCA	NCCC1=CNN=C1C(F)(F)F	EN300-75767
Cycle1	cctcttggtAG	accaagaggCA	NCC=1N=C(N2CCCCC12)C(F)(F)F	EN300-358926
Cycle1	cactctgagAG	ctcagagtgCA	NCCCN1N=C2CCCCN2C1=O	EN300-43403
Cycle1	agggtgactAG	agtcaccctCA	NC[C@@H]1C[C@H](C[C@@H]1O)C2=NN=C3COCCN23 |&1:2,4,6,r|	EN300-705782
Cycle1	ggtcgttcaAG	tgaacgaccCA	NCC1=NN=C2C(CCCN12)C(F)(F)F	EN300-94139
Cycle1	atagagctgAG	cagctctatCA	CC(C)C(CN)C1=NN=C2C=CC(C)=NN12	EN300-189026
Cycle1	agcctagcaAG	tgctaggctCA	NCC1=NN=C2C=CC(=CN12)C(F)(F)F	EN300-15369
Cycle1	gtatgccttAG	aaggcatacCA	CC1CN(CCCO1)C2=C(CN)C(C)=NN2C	EN300-187649
Cycle1	accagcttgAG	caagctggtCA	NCC1CCCN(C1)C2=NC=CN3C=NN=C23	EN300-112678
Cycle1	caaggtttcAG	gaaaccttgCA	NCC1CCCN(C1)S(=O)(=O)C=2C=NNC2	EN300-75472
Cycle1	aagcatggtAG	accatgcttCA	NCCCC1C=NNC1=O	EN300-84259
Cycle1	gccgttcatAG	atgaacggcCA	CC=1C=CC(NC(=O)C2(CN)CCCC2)=CC1C	EN300-96812
Cycle1	tacgctggaAG	tccagcgtaCA	CC=1C=CC(SC2(CN)CCCC2)=CC1	EN300-101484
Cycle1	atagcctcgAG	cgaggctatCA	NCC1(CC1)C=2C=CC=CC2	EN300-25779
Cycle1	ttcgctccaAG	tggagcgaaCA	NCC1=CCCC1	EN300-139380
Cycle1	atgtgcctaAG	taggcacatCA	CC=1C=C(C)C=C(C1)C(O)CN	EN300-203294
Cycle1	gcattactcAG	gagtaatgcCA	NCC=1C=CC=C(CN2CCCC(C2)C(=O)N)C1	EN300-72641
Cycle1	tctaccggaAG	tccggtagaCA	NCC1CN(CC=2C=CC=CC2)CC31CCC3	EN300-247512
Cycle1	gcgaactgaAG	tcagttcgcCA	NCC1CC=2C=CC=CC12	EN300-45115
Cycle1	gtaggtgtcAG	gacacctacCA	COC=1C=CC=C(CN)C1OC2CCCC2	EN300-76530
Cycle1	gtcggatcaAG	tgatccgacCA	CN(C)CC=1C=CC(=CC1)C=2C=CC=CC2CN	EN300-29010
Cycle1	ggtccaagaAG	tcttggaccCA	NC[C@@H]1OCO[C@H]1C(=O)NC2CC2 |&1:2,6,r|	EN300-814063
Cycle1	tgtaggtcaAG	tgacctacaCA	NCC1CN2CCCC2CO1	EN300-60049
Cycle1	tgctcaacaAG	tgttgagcaCA	CN1CCOC(CN)C1	EN300-59985
Cycle1	gcttgtgatAG	atcacaagcCA	NCCN1CC2CCC(C1)O2	EN300-245370
Cycle1	catcctaacAG	gttaggatgCA	NCC(OCC1CC1)C(F)(F)F	EN300-68581
Cycle1	ggttcgtctAG	agacgaaccCA	CC1(C)CN(CCN)CCO1	EN300-62415
Cycle1	cgtattctcAG	gagaatacgCA	NCCN1CCNC1=O	EN300-253681
Cycle1	gtacatgctAG	agcatgtacCA	NCCN1CC=CC1	EN300-84783
Cycle1	cctcaagtaAG	tacttgaggCA	CC(C)(C)OC(=O)C1CC2(C1)CCC(CN)O2	EN300-379168
Cycle1	ttgcaccctAG	agggtgcaaCA	CC1=C(C)CC(C(CN)C1)S(=O)(=O)O	EN300-706249
Cycle1	cattctcgtAG	acgagaatgCA	NCS(=O)(=O)O	EN300-101762
Cycle1	gtccctaacAG	gttagggacCA	NCCC=1C=C(F)C=C2COCOC12	EN300-39042
Cycle1	agaggatagAG	ctatcctctCA	NCC1=NN=C(S1)C=2C=CN=CC2F	EN300-190252
Cycle1	taacgcactAG	agtgcgttaCA	NCC1=CC(=O)C(OCC=C)=CO1	EN300-264034
Cycle1	cctagtagtAG	actactaggCA	CC(=C)C1OCCC1CN	EN300-196378
Cycle1	ttcggtgcaAG	tgcaccgaaCA	CC(C)C(CN)N(CC=C)CC=C	EN300-29949
Cycle1	tcaacctgtAG	acaggttgaCA	NCC=1C=CC=C(C1)C2=CC=C(C#N)S2	EN300-83179
Cycle1	ttcacgtccAG	ggacgtgaaCA	CC(C)(C)OC(=O)N1CC=2C=CC(CN)=CC2C1	EN300-137728
Cycle1	aacactccgAG	cggagtgttCA	CC(C)(C)OC(=O)NC1=NC=C(CN)S1	EN300-398746
Cycle1	gcttacctcAG	gaggtaagcCA	CC1OC(C)(C)N(C1CN)C(=O)OC(C)(C)C	EN300-79003
Cycle1	cgttcaagaAG	tcttgaacgCA	CC=1NC=2C(CN)=CC(C)=CC2C1C	EN300-55878
Cycle1	agagacctcAG	gaggtctctCA	NCCC1=CC=2C=CC=CC2N1	EN300-87836
Cycle1	ccgttacttAG	aagtaacggCA	COC=1C=C(OC)C=2C=C(CCCN)NC2C1	EN300-103687
Cycle1	gggatcctaAG	taggatcccCA	CS(=O)CCN	EN300-71328
Cycle1	cctagatctAG	agatctaggCA	NCC(O)(P(=O)(O)O)P(=O)(O)O	EN300-1266344
Cycle1	acgccctatAG	atagggcgtCA	CCOC=CC(O)(CN)C(F)(F)F	EN300-87335
Cycle1	atgcccacaAG	tgtgggcatCA	CN1C2(CCC2)COCC1(CN)CO	EN300-315315
Cycle1	gttacctcgAG	cgaggtaacCA	CC(C)(CN)C1COCC21OCCO2	EN300-247196
Cycle1	GAATCCCTGAG	CAGGGATTCCA	C#CC[C@@H](NC(OCC1C2=CC=CC=C2C3=CC=CC=C31)=O)CC(O)=O	332064-94-5
Cycle1	GAGTTCCTCAG	GAGGAACTCCA	FC=1C=CC(=CC1)C[C@H](CC(O)=O)NC(OCC2C3=CC=CC=C3C4=CC=CC=C42)=O	331763-70-3
Cycle1	CTTCATTGGAG	CCAATGAAGCA	N#CC=1C=CC(=CC1)C[C@@H](CC(O)=O)NC(OCC2C3=CC=CC=C3C4=CC=CC=C42)=O	270065-90-2
Cycle1	TTACGTCCTAG	AGGACGTAACA	FC1=C(F)C(F)=C(F)C(F)=C1C[C@@H](CC(O)=O)NC(OCC2C3=CC=CC=C3C4=CC=CC=C42)=O	270063-43-9
Cycle1	AAGGAAGACAG	GTCTTCCTTCA	C#CC[C@H](NC(OCC1C2=CC=CC=C2C3=CC=CC=C31)=O)CC(O)=O	1217669-02-7
Cycle1	ACACCTGCTAG	AGCAGGTGTCA	FC1=C(F)C(F)=C(F)C(F)=C1C[C@H](CC(O)=O)NC(OCC2C3=CC=CC=C3C4=CC=CC=C42)=O	269398-94-9
Cycle1	CCATGTAGCAG	GCTACATGGCA	O=C(O)[C@H]1C[C@H](C=C1)NC(OCC2C3=CC=CC=C3C4=CC=CC=C42)=O	220497-64-3
Cycle1	ATACGTCCGAG	CGGACGTATCA	ClC1=CC2=C(C=C1)C(C[C@H](C(O)=O)NC(OCC3C4=CC=CC=C4C5=CC=CC=C53)=O)=CN2	925916-73-0
Cycle1	CCACCTACTAG	AGTAGGTGGCA	N#CC=1C=CC(=CC1)C[C@H](CC(O)=O)NC(OCC2C3=CC=CC=C3C4=CC=CC=C42)=O	269726-87-6
Cycle1	AGTGGGATGAG	CATCCCACTCA	O=C(O)[C@@H](NC(OCC1C2=CC=CC=C2C3=CC=CC=C31)=O)CCC4CCCCC4	269078-73-1
Cycle1	GACCGGATTAG	AATCCGGTCCA	C1=CC=C2CN([C@@H](CC2=C1)C(=O)O)C(=O)OCC3C4=CC=CC=C4C5=CC=CC=C53	136030-33-6
Cycle1	GAACGCCTTAG	AAGGCGTTCCA	ClC=1C=CC(=CC1)C[C@H](C(O)=O)NC(OCC2C3=CC=CC=C3C4=CC=CC=C42)=O	142994-19-2
Cycle1	ATCGCGTACAG	GTACGCGATCA	N#CC=1C=CC(=CC1)C[C@H](C(O)=O)NC(OCC2C3=CC=CC=C3C4=CC=CC=C42)=O	205526-34-7
Cycle1	GTTCGGTACAG	GTACCGAACCA	C1=CC=C2C(=C1)C3=CC=CC=C3C2COC(=O)N4CCCC[C@@H]4C(=O)O	101555-63-9
Cycle1	ATGTCGGAAAG	TTCCGACATCA	O=C(O)[C@H](NC(OCC1C2=CC=CC=C2C3=CC=CC=C31)=O)C4CCCCC4	198543-96-3
Cycle1	GAAGAGCGTAG	ACGCTCTTCCA	O=C(O)[C@H](NC(OCC1C2=CC=CC=C2C3=CC=CC=C31)=O)CCC4CCCCC4	269078-72-0
Cycle1	CAAAGCCGTAG	ACGGCTTTGCA	O=C([C@@H]1C[C@H](NC(OCC2C3=C(C4=C2C=CC=C4)C=CC=C3)=O)CC1)O	220497-66-5
Cycle1	AGGATGTTGAG	CAACATCCTCA	C1=CC=C2C(=C1)C3=CC=CC=C3C2COC(=O)N4CC(C4)C(=O)O	193693-64-0
Cycle1	CGATTGAGAAG	TCTCAATCGCA	C1=CC=C2C(=C1)C3=CC=CC=C3C2COC(=O)N4CCC[C@H]4C(=O)N5CCC[C@H]5C(=O)O	129223-22-9
Cycle1	AGGCTGTTGAG	CAACAGCCTCA	O=C(O)[C@H](CC1=CSC=C1)NC(OCC2C3=CC=CC=C3C4=CC=CC=C42)=O	186320-06-9
Cycle1	GTGTTCTCTAG	AGAGAACACCA	ClC1=CC2=C(C=C1)C(C[C@@H](C(O)=O)NC(OCC3C4=CC=CC=C4C5=CC=CC=C53)=O)=CN2	908847-42-7
Cycle1	CTCATTACGAG	CGTAATGAGCA	O=C(O)[C@H](CC1=CSC=N1)NC(OCC2C3=CC=CC=C3C4=CC=CC=C42)=O	205528-32-1
Cycle1	TTAGAACGGAG	CCGTTCTAACA	CN([C@@H](CC1CCCCC1)C(=O)O)C(=O)OCC2C3=CC=CC=C3C4=CC=CC=C42	148983-03-3
Cycle1	TCTATCCCTAG	AGGGATAGACA	O=C(O)[C@H](CC1=CC=CO1)NC(OCC2C3=CC=CC=C3C4=CC=CC=C42)=O	159611-02-6
Cycle1	ACGTTCAGAAG	TCTGAACGTCA	O=C(O)[C@H](NC(OCC1C2=CC=CC=C2C3=CC=CC=C31)=O)CC=4C=CC(=CC4)C5=CC=CC=C5	205526-38-1
Cycle1	AAGTCACACAG	GTGTGACTTCA	O=C(O)C1CCC(CC1)CNC(OCC2C3=CC=CC=C3C4=CC=CC=C42)=O	188715-40-4
Cycle1	CAGCTAAAGAG	CTTTAGCTGCA	C=CCC(C(O)=O)(NC(OCC1C2=CC=CC=C2C3=CC=CC=C31)=O)CC=C	1311992-97-8
Cycle1	TGGAAACCGAG	CGGTTTCCACA	O=C(O)C[C@H](C1=CC([N+]([O-])=O)=CC=C1)NC(OCC2C3=CC=CC=C3C4=CC=CC=C42)=O	374791-04-5
Cycle1	TTCCGAGAGAG	CTCTCGGAACA	NC(NCCC[C@H](C(O)=O)NC(OCC1C2=CC=CC=C2C3=CC=CC=C31)=O)=O	200344-33-8
Cycle1	CCTTATGCTAG	AGCATAAGGCA	O=C(O)C[C@H](C1=CC=C(Br)C=C1)NC(OCC2C3=CC=CC=C3C4=CC=CC=C42)=O	220498-04-4
Cycle1	CCACAATCGAG	CGATTGTGGCA	CC1=CC=CC=C1[C@H](NC(OCC2C3=CC=CC=C3C4=CC=CC=C42)=O)CC(O)=O	507472-27-7
Cycle1	TGGTGTGAGAG	CTCACACCACA	O=C(O)C[C@H](C1=CC=C(C(F)(F)F)C=C1)NC(OCC2C3=CC=CC=C3C4=CC=CC=C42)=O	517905-88-3
Cycle1	TGACGTAGCAG	GCTACGTCACA	O=C(O)CC(C1=CC=C(Br)C=C1)NC(OCC2C3=CC=CC=C3C4=CC=CC=C42)=O	269078-76-4
Cycle1	GTAGGTTTGAG	CAAACCTACCA	CC1=CC=C(C(NC(OCC2C3=CC=CC=C3C4=CC=CC=C42)=O)CC(O)=O)C=C1	284492-08-6
Cycle1	CACTTGTTCAG	GAACAAGTGCA	C1=CC=C(C=C1)C[C@@H](C(=O)N2CCC[C@H]2C(=O)O)NC(=O)OCC3C4=C(C=CC=C4)C5=C3C=CC=C5	138372-76-6
Cycle1	ATGAGCTGCAG	GCAGCTCATCA	C=CCC(NC(OCC1C2=CC=CC=C2C3=CC=CC=C31)=O)C(O)=O	221884-63-5
Cycle1	GAATAGGCCAG	GGCCTATTCCA	C1CCC2C(C1)C[C@H](C(=O)O)N2C(=O)OCC3C4=CC=CC=C4C5=CC=CC=C53	1217512-55-4
Cycle1	GTACATCAGAG	CTGATGTACCA	O=C(O)C[C@@H](CC1=CC=CS1)NC(OCC2C3=CC=CC=C3C4=CC=CC=C42)=O	270262-98-1
Cycle1	AGGCGTTCAAG	TGAACGCCTCA	C=CC[C@@H](NC(OCC1C2=CC=CC=C2C3=CC=CC=C31)=O)C(O)=O	170642-28-1
Cycle1	GAGAATGCTAG	AGCATTCTCCA	C#CCCC[C@@H](C(=O)O)NC(=O)OCC1C2=C(C=CC=C2)C3=C1C=CC=C3	1097192-05-6
Cycle1	TCACGATCCAG	GGATCGTGACA	FC1=C(F)C(F)=C(F)C(F)=C1C[C@@H](C(O)=O)NC(OCC2C3=CC=CC=C3C4=CC=CC=C42)=O	205526-32-5
Cycle1	ACGGGAACAAG	TGTTCCCGTCA	CC1=CC=C(C[C@H](NC(OCC2C3=CC=CC=C3C4=CC=CC=C42)=O)C(O)=O)C=C1	199006-54-7
Cycle1	CAACGACACAG	GTGTCGTTGCA	CC1=C(C(C)=CC(O)=C1)C[C@H](NC(OCC2C3=CC=CC=C3C4=CC=CC=C42)=O)C(O)=O	206060-54-0
Cycle1	GTAAGGGTCAG	GACCCTTACCA	O=C(O)[C@H](CC1=CSC2=CC=CC=C12)NC(OCC3C4=CC=CC=C4C5=CC=CC=C53)=O	177966-60-8
Cycle1	CACATGACTAG	AGTCATGTGCA	O=C([C@H]1N(C(OCC2C3=C(C4=C2C=CC=C4)C=CC=C3)=O)[C@@]5([H])CCCC[C@@]5([H])C1)O	130309-37-4
Cycle1	ATAGCAGTGAG	CACTGCTATCA	O=C(O)C1=CC=CC(CNC(OCC2C3=CC=CC=C3C4=CC=CC=C42)=O)=C1	155369-11-2
Cycle1	TCCAGACATAG	ATGTCTGGACA	FC1=CC(C[C@H](C(O)=O)NC(OCC2C3=CC=CC=C3C4=CC=CC=C42)=O)=CC(F)=C1F	205526-31-4
Cycle1	TCAATCAGGAG	CCTGATTGACA	ClC=1C=CC(=CC1Cl)C[C@@H](C(O)=O)NC(OCC2C3=CC=CC=C3C4=CC=CC=C42)=O	177966-59-5
Cycle1	TCCCGAACTAG	AGTTCGGGACA	C1=CC=C2C(=C1)C3=CC=CC=C3C2COC(=O)N4CCC(C4)C(=O)O	885951-89-3
Cycle1	GTAAGAGAGAG	CTCTCTTACCA	IC=1C=CC(=CC1)C[C@@H](C(O)=O)NC(OCC2C3=CC=CC=C3C4=CC=CC=C42)=O	82565-68-2
Cycle1	CTCGCAACTAG	AGTTGCGAGCA	IC=1C=CC(=CC1)C[C@H](C(O)=O)NC(OCC2C3=CC=CC=C3C4=CC=CC=C42)=O	205526-29-0
Cycle1	GTTGGCTTGAG	CAAGCCAACCA	C1=CC=C2C(=C1)C[C@@H](C(=O)O)N2C(=O)OCC3C4=CC=CC=C4C5=CC=CC=C53	198560-38-2
Cycle1	TCTTCAGGGAG	CCCTGAAGACA	O=[N+]([O-])C=1C=CC(=C(C1)[N+]([O-])=O)NC[C@@H](C(O)=O)NC(OCC2C3=CC=CC=C3C4=CC=CC=C42)=O	140430-54-2
Cycle1	GAAGTATGCAG	GCATACTTCCA	O=C(O)[C@@H](CC1=CSC2=CC=CC=C12)NC(OCC3C4=CC=CC=C4C5=CC=CC=C53)=O	177966-61-9
Cycle1	CTAAGTCACAG	GTGACTTAGCA	O=C(O)[C@H](CC1CC1)NC(OCC2C3=CC=CC=C3C4=CC=CC=C42)=O	214750-76-2
Cycle1	AGAGTAAGGAG	CCTTACTCTCA	O=C(O)C[C@H](CC1=CC=CO1)NC(OCC2C3=CC=CC=C3C4=CC=CC=C42)=O	270263-07-5
Cycle1	GTTTACCCCAG	GGGGTAAACCA	O=C(O)C1(NC(OCC2C3=CC=CC=C3C4=CC=CC=C42)=O)CCCCC1	162648-54-6
Cycle1	CTTTCGGGAAG	TCCCGAAAGCA	FC1=CC2=C(C=C1)C(CC(C(O)=O)NC(OCC3C4=CC=CC=C4C5=CC=CC=C53)=O)=CN2	1219392-55-8
Cycle1	CTAGGGAGTAG	ACTCCCTAGCA	ClC=1C=CC(=CC1Cl)C[C@H](C(O)=O)NC(OCC2C3=CC=CC=C3C4=CC=CC=C42)=O	177966-58-4
Cycle1	GTAAAGCTCAG	GAGCTTTACCA	BrC=1C=CC(=CC1)C[C@@H](C(O)=O)NC(OCC2C3=CC=CC=C3C4=CC=CC=C42)=O	198561-04-5
Cycle1	CCTACTTGCAG	GCAAGTAGGCA	O=[N+]([O-])C=1C=CC(=CC1)C[C@H](C(O)=O)NC(OCC2C3=CC=CC=C3C4=CC=CC=C42)=O	177966-63-1
Cycle1	AAGCTCGTAAG	TACGAGCTTCA	O=C(O)C[C@@H](NC(OCC1C2=CC=CC=C2C3=CC=CC=C31)=O)C/C=C/C4=CC=CC=C4	1217460-65-5
Cycle1	ACGATTAGCAG	GCTAATCGTCA	O=C(O)[C@@H](CC1=CN=CC=C1)NC(OCC2C3=CC=CC=C3C4=CC=CC=C42)=O	142994-45-4
Cycle1	AACGGAGTAAG	TACTCCGTTCA	O=C(O)[C@@H](NC(OCC1C2=CC=CC=C2C3=CC=CC=C31)=O)C4CCCC4	220497-61-0
Cycle1	CAACTGAAGAG	CTTCAGTTGCA	O=C(O)C=1C=CC(=CC1)CNC(OCC2C3=CC=CC=C3C4=CC=CC=C42)=O	164470-64-8
Cycle1	AAGAATGGCAG	GCCATTCTTCA	O=C(O)C1(CCCC1)NC(OCC2C3=CC=CC=C3C4=CC=CC=C42)=O	117322-30-2
Cycle1	AGGGGAACAAG	TGTTCCCCTCA	O=C(O)C1(CCC1)NC(OCC2C3=CC=CC=C3C4=CC=CC=C42)=O	885951-77-9
Cycle1	CGCGAATATAG	ATATTCGCGCA	FC(F)(F)C=1C=CC(=CC1)C[C@@H](C(O)=O)NC(OCC2C3=CC=CC=C3C4=CC=CC=C42)=O	247113-86-6
Cycle1	AAGTCGGATAG	ATCCGACTTCA	C1=CC=C2C(=C1)C3=CC=CC=C3C2COC(=O)N4CC5=CC(=CC=C5C[C@H]4C(=O)O)O	178432-49-0
Cycle1	GTTCTGCTTAG	AAGCAGAACCA	COC1=C(OC)C=C(C[C@H](NC(OCC2C3=CC=CC=C3C4=CC=CC=C42)=O)C(O)=O)C=C1	184962-88-7
Cycle1	CACCACTTAAG	TAAGTGGTGCA	O=C(O)[C@H](CC1=CC=CS1)NC(OCC2C3=CC=CC=C3C4=CC=CC=C42)=O	130309-35-2
Cycle1	CATGATGAGAG	CTCATCATGCA	OC=1C=CC2=C(C1)C(=CN2)C[C@@H](C(O)=O)NC(OCC3C4=CC=CC=C4C5=CC=CC=C53)=O	178119-94-3
Cycle1	CACGATCATAG	ATGATCGTGCA	O=C(O)[C@H]1CCC[C@@H]1NC(OCC2C3=CC=CC=C3C4=CC=CC=C42)=O	359586-64-4
Cycle1	GCCCTATTAAG	TAATAGGGCCA	O=C(O)C[C@H](CC1=CSC=C1)NC(OCC2C3=CC=CC=C3C4=CC=CC=C42)=O	270263-01-9
Cycle1	GACCTTTGGAG	CCAAAGGTCCA	O=C(O)C1(CCOCC1)NC(OCC2C3=CC=CC=C3C4=CC=CC=C42)=O	285996-72-7
Cycle1	ATGCCTCCTAG	AGGAGGCATCA	O=C(O)[C@H](C1=CSC=C1)NC(OCC2C3=CC=CC=C3C4=CC=CC=C42)=O	1217706-09-6
Cycle1	TGTTCAGGCAG	GCCTGAACACA	O=C(O)C1(CC1)NC(OCC2C3=CC=CC=C3C4=CC=CC=C42)=O	126705-22-4
Cycle1	TTCCCAGTAAG	TACTGGGAACA	C1=CC=C2C(=C1)C3=CC=CC=C3C2COC(=O)NC4=CC=C(C=C4)C(=O)O	185116-43-2
Cycle1	GGACTTCGAAG	TCGAAGTCCCA	C#CC[C@@H](NC(OCC1C2=CC=CC=C2C3=CC=CC=C31)=O)C(O)=O	220497-98-3
Cycle1	TAAGAAGCGAG	CGCTTCTTACA	C#CC[C@H](NC(OCC1C2=CC=CC=C2C3=CC=CC=C31)=O)C(O)=O	198561-07-8
Cycle1	CTAGCGGTTAG	AACCGCTAGCA	ClC=1C=CC(=C(C1)Cl)C[C@@H](C(O)=O)NC(OCC2C3=CC=CC=C3C4=CC=CC=C42)=O	352351-62-3
Cycle1	TGCGATCAGAG	CTGATCGCACA	FC1=CC(C[C@@H](C(O)=O)NC(OCC2C3=CC=CC=C3C4=CC=CC=C42)=O)=CC(F)=C1F	205526-30-3
Cycle1	CGCAAAGACAG	GTCTTTGCGCA	O=C(O)[C@H](CC1=CN=CC=C1)NC(OCC2C3=CC=CC=C3C4=CC=CC=C42)=O	175453-07-3
Cycle1	CCCGGTTATAG	ATAACCGGGCA	O=C(O)[C@H](NC(OCC1C2=CC=CC=C2C3=CC=CC=C31)=O)C4CCCC4	136555-16-3
Cycle1	CCGAATAGGAG	CCTATTCGGCA	O=C(O)[C@@H](NC(OCC1C2=CC=CC=C2C3=CC=CC=C31)=O)CCCNC(OCC4=CC=CC=C4)=O	138775-07-2
Cycle1	GGCCAGTTTAG	AAACTGGCCCA	FC(F)(F)C(NCCCC[C@@H](C(O)=O)NC(OCC1C2=CC=CC=C2C3=CC=CC=C31)=O)=O	76265-69-5
Cycle1	ACTAGTACCAG	GGTACTAGTCA	O=C(CC[C@H](NC(OCC1C2=CC=CC=C2C3=CC=CC=C31)=O)C(O)=O)OC4CCCCC4	150047-85-1
Cycle1	ACCTATCTCAG	GAGATAGGTCA	[N-]=[N+]=NCCC[C@@H](C(O)=O)NC(OCC1C2=CC=CC=C2C3=CC=CC=C31)=O	1097192-04-5
Cycle1	AGGAGCAGTAG	ACTGCTCCTCA	C#CC[C@](C(O)=O)(NC(OCC1C2=CC=CC=C2C3=CC=CC=C31)=O)C	1198791-65-9
Cycle1	GCTCGAAGAAG	TCTTCGAGCCA	C[C@@H](OCC1=CC=CC=C1)[C@H](NC(OCC2C3=CC=CC=C3C4=CC=CC=C42)=O)C(O)=O	117872-75-0
Cycle1	CAGAATCCCAG	GGGATTCTGCA	O=C(O)C[C@H](C1=CC=C([N+]([O-])=O)C=C1)NC(OCC2C3=CC=CC=C3C4=CC=CC=C42)=O	507472-26-6
Cycle1	ACGCTCCAAAG	TTGGAGCGTCA	COC1=CC(OC)=CC([C@H](NC(OCC2C3=CC=CC=C3C4=CC=CC=C42)=O)CC(O)=O)=C1	511272-41-6
Cycle1	TCTCCGATCAG	GATCGGAGACA	O=C(O)C[C@H](C1=CN=CC=C1)NC(OCC2C3=CC=CC=C3C4=CC=CC=C42)=O	511272-43-8
Cycle1	GTCAAAGAGAG	CTCTTTGACCA	O=C(O)C[C@H](C1=CC=CS1)NC(OCC2C3=CC=CC=C3C4=CC=CC=C42)=O	511272-45-0
Cycle1	CGTTCGTATAG	ATACGAACGCA	O=C(O)C[C@H](C1=CC=CO1)NC(OCC2C3=CC=CC=C3C4=CC=CC=C42)=O	1217662-55-9
Cycle1	TAGTAGGAGAG	CTCCTACTACA	CC(C1=CC=C(C[C@H](NC(OCC2C3=CC=CC=C3C4=CC=CC=C42)=O)C(O)=O)C=C1)=O	204716-07-4
Cycle1	CCGTTACACAG	GTGTAACGGCA	O=C(O)C1=CC(NC(OCC2C3=CC=CC=C3C4=CC=CC=C42)=O)=C(N)C=C1	1071446-05-3
Cycle1	AGAGATTCGAG	CGAATCTCTCA	C1(C2=C(C=CC=C2)C3=C1C=CC=C3)COC(N[C@H](C(=O)O)C4=CC=C(C=C4)OC)=O	1260596-73-3
Cycle1	GAGTGGACTAG	AGTCCACTCCA	O=C(O)[C@H](CC1=CNC2=C1C=CC=N2)NC(OCC3C4=CC=CC=C4C5=CC=CC=C53)=O	737007-45-3
Cycle1	TTATGGCCGAG	CGGCCATAACA	N1([C@H](C(=O)O)C[C@H](C1)F)C(=O)OCC1c2c(cccc2)c2c1cccc2	1228307-81-0
Cycle1	GTAGCCTGTAG	ACAGGCTACCA	FC1=CC(C[C@H](C(O)=O)NC(OCC2C3=CC=CC=C3C4=CC=CC=C42)=O)=CC(F)=C1	205526-25-6
Cycle1	TGGCGTTTTAG	AAAACGCCACA	FC=1C=CC(=C(C1)F)C[C@@H](C(O)=O)NC(OCC2C3=CC=CC=C3C4=CC=CC=C42)=O	1032337-49-7
Cycle1	TACTCGGGAAG	TCCCGAGTACA	C1=CC=C2C(=C1)C3=CC=CC=C3C2COC(=O)N4CSC[C@H]4C(=O)O	133054-21-4
Cycle1	TGAGTTCAGAG	CTGAACTCACA	C1(C2=C(C=CC=C2)C3=C1C=CC=C3)COC(N([C@H](C(=O)O)CC4=CC=C(C=C4)Cl)C)=O	1217716-50-1
Cycle1	TATGTGGGGAG	CCCCACATACA	O=C(O)C1(NC(OCC2C3=CC=CC=C3C4=CC=CC=C42)=O)CC5=CC=CC=C5C1	135944-07-9
Cycle1	AGGGTCCTTAG	AAGGACCCTCA	O=C(O)[C@H](CC1CCC1)NC(OCC2C3=CC=CC=C3C4=CC=CC=C42)=O	478183-62-9
Cycle1	AGCCAACTTAG	AAGTTGGCTCA	O=C(O)[C@@H]1CCC[C@H]1NC(OCC2C3=CC=CC=C3C4=CC=CC=C42)=O	359586-69-9
Cycle1	GCACATATCAG	GATATGTGCCA	O=C(O)CC1(NC(OCC2C3=CC=CC=C3C4=CC=CC=C42)=O)CCCCC1	282524-98-5
Cycle1	AGCATCGCTAG	AGCGATGCTCA	O=C(O)CC1(CNC(OCC2C3=CC=CC=C3C4=CC=CC=C42)=O)CCCCC1	882847-19-0
Cycle1	GCTGCGATTAG	AATCGCAGCCA	O=C(O)[C@@H]1CC[C@H](CC1)CNC(OCC2C3=CC=CC=C3C4=CC=CC=C42)=O	167690-53-1
Cycle1	CGTCTCACTAG	AGTGAGACGCA	O=[N+]([O-])C=1C=CC(=CC1)C[C@@H](C(O)=O)NC(OCC2C3=CC=CC=C3C4=CC=CC=C42)=O	95753-55-2
Cycle1	CCTGTGCATAG	ATGCACAGGCA	C1=CC=C2C(=C1)C3=CC=CC=C3C2COC(=O)N4CCCC[C@H]4C(=O)O	86069-86-5
Cycle1	CTCGACTTAAG	TAAGTCGAGCA	O=C(O)[C@@H]1CC[C@H](CC1)NC(OCC2C3=CC=CC=C3C4=CC=CC=C42)=O	147900-46-7
Cycle1	ACTTCGCACAG	GTGCGAAGTCA	CC1(OCC2=C(O1)C=CC(C[C@H](NC(OCC3C4=CC=CC=C4C5=CC=CC=C53)=O)C(O)=O)=C2)C	252049-13-1
Cycle1	TGTTCCGGTAG	ACCGGAACACA	IC=1C=CC(=CC1)C[C@H](CC(O)=O)NC(OCC2C3=CC=CC=C3C4=CC=CC=C42)=O	269396-73-8
Cycle1	GCCTTAATCAG	GATTAAGGCCA	BrC=1C=CC(=CC1)C[C@@H](CC(O)=O)NC(OCC2C3=CC=CC=C3C4=CC=CC=C42)=O	270062-86-7
Cycle1	TGCGACGATAG	ATCGTCGCACA	ClC=1C=CC(=CC1Cl)C[C@@H](CC(O)=O)NC(OCC2C3=CC=CC=C3C4=CC=CC=C42)=O	270063-52-0
Cycle1	AGATGAGAGAG	CTCTCATCTCA	IC=1C=CC(=CC1)C[C@@H](CC(O)=O)NC(OCC2C3=CC=CC=C3C4=CC=CC=C42)=O	270065-72-0
Cycle1	TGCCCTAGAAG	TCTAGGGCACA	O=C(O)C[C@H](CC1=CNC2=CC=CC=C12)NC(OCC3C4=CC=CC=C4C5=CC=CC=C53)=O	353245-98-4
Cycle1	TGAAGACACAG	GTGTCTTCACA	O=C(O)C[C@@H](C1=CC=C(F)C=C1)NC(OCC2C3=CC=CC=C3C4=CC=CC=C42)=O	479064-89-6
Cycle1	TCCAGTGACAG	GTCACTGGACA	O=C(O)C[C@@H](C1=C(Cl)C(Cl)=CC=C1)NC(OCC2C3=CC=CC=C3C4=CC=CC=C42)=O	501015-35-6
Cycle1	TTCACCACTAG	AGTGGTGAACA	O=C(O)C[C@H](C1=C(Cl)C=C(Cl)C=C1)NC(OCC2C3=CC=CC=C3C4=CC=CC=C42)=O	511272-37-0
Cycle1	TAGGCATCCAG	GGATGCCTACA	O=C(O)[C@@H](NC(OCC1C2=CC=CC=C2C3=CC=CC=C31)=O)C4CCCCC4	161321-36-4
Cycle1	GCGTATTCGAG	CGAATACGCCA	O=C(O)[C@@H](NC(OCC1C2=CC=CC=C2C3=CC=CC=C31)=O)CC4=CC=CC=C4F	205526-26-7
Cycle1	TAGCCTTTGAG	CAAAGGCTACA	FC=1C=CC(=CC1F)C[C@H](C(O)=O)NC(OCC2C3=CC=CC=C3C4=CC=CC=C42)=O	198545-59-4
Cycle1	CTTCGCATCAG	GATGCGAAGCA	FC=1C=CC(=CC1)C[C@@H](C(O)=O)NC(OCC2C3=CC=CC=C3C4=CC=CC=C42)=O	169243-86-1
Cycle1	CGAATTGCTAG	AGCAATTCGCA	C1=CC=C2CN([C@H](CC2=C1)C(=O)O)C(=O)OCC3C4=CC=CC=C4C5=CC=CC=C53	130309-33-0
Cycle1	CACGTCTCAAG	TGAGACGTGCA	O=C(O)[C@H](NC(OCC1C2=CC=CC=C2C3=CC=CC=C31)=O)CC4=CC=CC=C4Cl	205526-22-3
Cycle1	TCATGGGTAAG	TACCCATGACA	N#CC=1C=CC(=CC1)C[C@@H](C(O)=O)NC(OCC2C3=CC=CC=C3C4=CC=CC=C42)=O	173963-93-4
Cycle1	GATCACCGTAG	ACGGTGATCCA	CC(C)(OC(N1CCCC(C1)CC(NC(OCC2C3=CC=CC=C3C4=CC=CC=C42)=O)C(O)=O)=O)C	457060-97-8
Cycle1	GATCCGATAAG	TATCGGATCCA	C[C@]1(CCCN1C(=O)OCC2C3=CC=CC=C3C4=CC=CC=C42)C(=O)O	167275-47-0
Cycle1	CACAGTTGAAG	TCAACTGTGCA	C(F)(C1=CC=C(C[C@@H](C(O)=O)NC(=O)OCC2C3=C(C4=C2C=CC=C4)C=CC=C3)C=C1)F	1808268-08-7
Cycle1	TAGAATCCGAG	CGGATTCTACA	C1CN(C[C@@H](C(=O)O)NC(OCC2C3=C(C4=C2C=CC=C4)C=CC=C3)=O)CCO1	1251903-85-1
Cycle1	TGATCTGACAG	GTCAGATCACA	C1=CC=C2C(=C1)C3=CC=CC=C3C2COC(=O)N4CCC[C@@H]4CC(=O)O	193693-61-7
Cycle1	CTTGCCACTAG	AGTGGCAAGCA	C1=CC=C2C(=C1)C3=CC=CC=C3C2COC(=O)N4CC[C@@H]4C(=O)O	374791-02-3
Cycle1	CTATGTGTCAG	GACACATAGCA	O=C(O)C1(NC(OCC2C3=CC=CC=C3C4=CC=CC=C42)=O)CCC5=CC=CC=C51	214139-28-3
Cycle1	TCTGATGCGAG	CGCATCAGACA	C1=CC=C2C(=C1)CN(C2C(=O)O)C(=O)OCC3C4=CC=CC=C4C5=CC=CC=C53	204320-59-2
Cycle1	CGGTTTAAGAG	CTTAAACCGCA	O=C(O)[C@@H](NC(OCC1C2=CC=CC=C2C3=CC=CC=C31)=O)C/C=C/C4=CC=CC=C4	159610-82-9
Cycle1	GGAATCTACAG	GTAGATTCCCA	C1CC[C@H]2[C@@H](C1)C[C@@H](C(=O)O)N2C(=O)OCC3C4=CC=CC=C4C5=CC=CC=C53	214750-71-7
Cycle1	ACCCGAAGAAG	TCTTCGGGTCA	O=C(O)[C@@H](CC1=CC=C(N)C=C1)NC(OCC2C3=CC=CC=C3C4=CC=CC=C24)=O	324017-21-2
Cycle1	TTATCCCCCAG	GGGGGATAACA	C1(C2=C(C=CC=C2)C3=C1C=CC=C3)COC(NCC(C(=O)O)C4=CC=C(C=C4)Cl)=O	683217-64-3
Cycle1	CCTTCAGACAG	GTCTGAAGGCA	FC=1C=CC(=CC1F)C[C@@H](C(O)=O)NC(OCC2C3=CC=CC=C3C4=CC=CC=C42)=O	198560-43-9
Cycle1	TGACCACCAAG	TGGTGGTCACA	CC1=CC=CC=C1C[C@H](NC(OCC2C3=CC=CC=C3C4=CC=CC=C42)=O)C(O)=O	211637-75-1
Cycle1	CTGCTACTAAG	TAGTAGCAGCA	FC(F)(F)C=1C=CC(=CC1)C[C@H](C(O)=O)NC(OCC2C3=CC=CC=C3C4=CC=CC=C42)=O	238742-88-6
Cycle1	CCACACTTAAG	TAAGTGTGGCA	C1=CC=C2C(=C1)C3=CC=CC=C3C2COC(=O)N4C[C@H](C[C@@H]4C(=O)O)O	139262-20-7
Cycle1	GCTTCACTTAG	AAGTGAAGCCA	O=C(O)[C@H]1C[C@H](CC1)NC(OCC2C3=CC=CC=C3C4=CC=CC=C42)=O	220497-67-6
Cycle1	GCAAGTTGTAG	ACAACTTGCCA	CC(C)(OC(N1C[C@@H](C(O)=O)[C@H](NC(OCC2C3=CC=CC=C3C4=CC=CC=C42)=O)C1)=O)C	267230-44-4
Cycle1	ACGTTACAGAG	CTGTAACGTCA	C1=CC=C2C(=C1)C3=CC=CC=C3C2COC(=O)N4CCC[C@@H]4COCC(=O)O	1335206-44-4
Cycle1	GTCAGTAGAAG	TCTACTGACCA	C=CCC[C@@H](NC(OCC1C2=CC=CC=C2C3=CC=CC=C31)=O)C(O)=O	865352-21-2
Cycle1	CTCGAATTCAG	GAATTCGAGCA	C1=CC=C2C(=C1)C3=CC=CC=C3C2COC(=O)N4CCOC[C@@H]4C(=O)O	942153-03-9
Cycle1	ATCGTCACGAG	CGTGACGATCA	O=C(O)[C@H](C1CC1)NC(OCC2C3=CC=CC=C3C4=CC=CC=C42)=O	1212257-18-5
Cycle1	AACAACTGCAG	GCAGTTGTTCA	CC(C)(OC(N1CCC(C(NC(OCC2C3=CC=CC=C3C4=CC=CC=C42)=O)C(O)=O)CC1)=O)C	313051-96-6
Cycle1	AAGAGAGCAAG	TGCTCTCTTCA	CC(C)(OC(N1CCCC(C(NC(OCC2C3=CC=CC=C3C4=CC=CC=C42)=O)CC(O)=O)C1)=O)C	372144-11-1
Cycle1	ATCTCTGACAG	GTCAGAGATCA	O=C(O)C[C@@H](C1=CC=C(C#N)C=C1)NC(OCC2C3=CC=CC=C3C4=CC=CC=C42)=O	507472-24-4
Cycle1	GCCTAGAGTAG	ACTCTAGGCCA	CN1C=C(C2=CC=CC=C21)C[C@@H](NC(OCC3C4=CC=CC=C4C5=CC=CC=C53)=O)C(O)=O	168471-22-5
Cycle1	AGTTTCGGGAG	CCCGAAACTCA	CC(C)(C)[C@@H](C(O)=O)NC(OCC1C2=CC=CC=C2C3=CC=CC=C13)=O	132684-60-7
Cycle1	TTACATCCCAG	GGGATGTAACA	FC1=CC=CC(C[C@H](CC(O)=O)NC(OCC2C3=CC=CC=C3C4=CC=CC=C42)=O)=C1	331763-67-8
Cycle1	CCGTATAGTAG	ACTATACGGCA	N#CC1=CC=CC(C[C@H](CC(O)=O)NC(OCC2C3=CC=CC=C3C4=CC=CC=C42)=O)=C1	269726-84-3
Cycle1	GCCCAACTTAG	AAGTTGGGCCA	O=C(O)C[C@H](NC(OCC1C2=CC=CC=C2C3=CC=CC=C31)=O)CC4=CC=CC=C4Cl	268734-29-8
Cycle1	CCTATCAAGAG	CTTGATAGGCA	C1=CC=C2C(=C1)C3=CC=CC=C3C2COC(=O)N4CCC[C@H]4CC(=O)O	193693-60-6
Cycle1	ACCACCAACAG	GTTGGTGGTCA	C1=CC=C2CN([C@H](CC2=C1)CC(=O)O)C(=O)OCC3C4=CC=CC=C4C5=CC=CC=C53	332064-67-2
Cycle1	ACTGATGGGAG	CCCATCAGTCA	ClC=1C=CC(=CC1)C[C@H](CC(O)=O)NC(OCC2C3=CC=CC=C3C4=CC=CC=C42)=O	331763-60-1
Cycle1	AACGGGAATAG	ATTCCCGTTCA	ClC=1C=CC(=C(C1)Cl)C[C@@H](CC(O)=O)NC(OCC2C3=CC=CC=C3C4=CC=CC=C42)=O	270063-49-5
Cycle1	ATGTCTCAGAG	CTGAGACATCA	ClC=1C=CC(=C(C1)Cl)C[C@H](CC(O)=O)NC(OCC2C3=CC=CC=C3C4=CC=CC=C42)=O	269396-54-5
Cycle1	GCTGAATCAAG	TGATTCAGCCA	FC=1C=CC(=CC1)C[C@@H](CC(O)=O)NC(OCC2C3=CC=CC=C3C4=CC=CC=C42)=O	270062-83-4
Cycle1	TGTACTGGCAG	GCCAGTACACA	O=C(O)C[C@H](CC1=CC=CS1)NC(OCC2C3=CC=CC=C3C4=CC=CC=C42)=O	269726-90-1
Cycle1	ACAGAGCCAAG	TGGCTCTGTCA	O=C(O)C[C@H](CC1=CSC2=CC=CC=C12)NC(OCC3C4=CC=CC=C4C5=CC=CC=C53)=O	270063-46-2
Cycle1	ATAGCATGGAG	CCATGCTATCA	BrC=1C=CC(=CC1)C[C@H](CC(O)=O)NC(OCC2C3=CC=CC=C3C4=CC=CC=C42)=O	331763-76-9
Cycle1	CGCATTGGAAG	TCCAATGCGCA	ClC=1C=CC(=CC1)C[C@@H](CC(O)=O)NC(OCC2C3=CC=CC=C3C4=CC=CC=C42)=O	270596-43-5
Cycle1	AAGCGAACGAG	CGTTCGCTTCA	ClC=1C=CC(=CC1Cl)C[C@H](CC(O)=O)NC(OCC2C3=CC=CC=C3C4=CC=CC=C42)=O	269396-57-8
Cycle1	CCGCAAAACAG	GTTTTGCGGCA	FC(F)(F)C=1C=CC(=CC1)C[C@H](CC(O)=O)NC(OCC2C3=CC=CC=C3C4=CC=CC=C42)=O	269726-78-5
Cycle1	TTCCTGCTGAG	CAGCAGGAACA	O=C(O)C[C@H](C1=CC=C(Cl)C=C1)NC(OCC2C3=CC=CC=C3C4=CC=CC=C42)=O	479064-92-1
Cycle1	TCTGGTCTGAG	CAGACCAGACA	O=C(O)C[C@H](C1=CC(Cl)=CC=C1)NC(OCC2C3=CC=CC=C3C4=CC=CC=C42)=O	511272-53-0
Cycle1	TTGGGCATAAG	TATGCCCAACA	C1CCC(C1)C[C@H](C(=O)O)NC(=O)OCC2C3=C(C=CC=C3)C4=C2C=CC=C4	1262802-59-4
Cycle1	GCAGGGAATAG	ATTCCCTGCCA	C=CC[C@H](NC(OCC1C2=CC=CC=C2C3=CC=CC=C31)=O)C(O)=O	146549-21-5
Cycle1	GCTACCATGAG	CATGGTAGCCA	O=[N+]([O-])C=1C=CC(=CC1)C[C@H](CC(O)=O)NC(OCC2C3=CC=CC=C3C4=CC=CC=C42)=O	269398-78-9
Cycle1	GGTTGAAGGAG	CCTTCAACCCA	O=[N+]([O-])C=1C=CC(=CC1)C[C@@H](CC(O)=O)NC(OCC2C3=CC=CC=C3C4=CC=CC=C42)=O	270062-88-9
Cycle1	ACGCGTAAAAG	TTTACGCGTCA	CC(=O)NCSC[C@@H](C(=O)O)NC(=O)OCC1C2=CC=CC=C2C3=CC=CC=C13	86060-81-3
Cycle1	ATGCTCGTGAG	CACGAGCATCA	CC(C)(C)OC(=O)NCCCC[C@@H](C(=O)O)NC(=O)OCC1C2=CC=CC=C2C3=CC=CC=C13	71989-26-9
Cycle1	GGTAAGTTGAG	CAACTTACCCA	C1C[C@H](N(C1)C(=O)OCC2C3=CC=CC=C3C4=CC=CC=C24)C(=O)O	71989-31-6
Cycle1	TCTTGCACGAG	CGTGCAAGACA	CC(C(C(=O)O)NC(=O)OCC1C2=CC=CC=C2C3=CC=CC=C13)OC(C)(C)C	71989-35-0
Cycle1	TACCCGAATAG	ATTCGGGTACA	CSCCC(C(=O)O)NC(=O)OCC1C2=CC=CC=C2C3=CC=CC=C13	71989-28-1
Cycle1	TTGTAGCGCAG	GCGCTACAACA	CC(C)(C)OCC(C(=O)O)NC(=O)OCC1C2=CC=CC=C2C3=CC=CC=C13	128107-47-1
Cycle1	ATTGCGTGCAG	GCACGCAATCA	CC(C)C(C(=O)O)NC(=O)OCC1C2=CC=CC=C2C3=CC=CC=C13	68858-20-8
Cycle1	GTAGTTCCGAG	CGGAACTACCA	CC(C)CC(C(=O)O)NC(=O)OCC1C2=CC=CC=C2C3=CC=CC=C13	35661-60-0
Cycle1	CAGTAGCTAAG	TAGCTACTGCA	C1=CC=C(C=C1)CC(C(=O)O)NC(=O)OCC2C3=CC=CC=C3C4=CC=CC=C24	35661-40-6
Cycle1	CATACGCGTAG	ACGCGTATGCA	CC(C(=O)O)NC(=O)OCC1C2=CC=CC=C2C3=CC=CC=C13	35661-39-3
Cycle1	ACAAGCACTAG	AGTGCTTGTCA	CC(C)(C)OC(=O)CCC(C(=O)O)NC(=O)OCC1C2=CC=CC=C2C3=CC=CC=C13	71989-18-9
Cycle1	CGACATCCTAG	AGGATGTCGCA	CC(C)(C)OC(=O)CC(C(=O)O)NC(=O)OCC1C2=CC=CC=C2C3=CC=CC=C13	71989-14-5
Cycle1	CGAGGAGTTAG	AACTCCTCGCA	C1=CC=C2C(=C1)C(C3=CC=CC=C32)COC(=O)NCC(=O)O	29022-11-5
Cycle1	AAATCAGCCAG	GGCTGATTTCA	CCC(C)C(C(=O)O)NC(=O)OCC1C2=CC=CC=C2C3=CC=CC=C13	71989-23-6
Cycle1	GATCCACATAG	ATGTGGATCCA	COC(=O)CC(C(=O)O)NC(=O)OCC1C2=CC=CC=C2C3=CC=CC=C13	145038-53-5
Cycle1	gttaaagggAG	ccctttaacCA	CC(C)(C)OCC(C(=O)O)NC(=O)OCC1C2=CC=CC=C2C3=CC=CC=C13	71989-33-8
Cycle1	cttgaccagAG	ctggtcaagCA	CC(C(=O)O)NC(=O)OCC1C2=CC=CC=C2C3=CC=CC=C13	79990-15-1
Cycle1	gggctgtaaAG	ttacagcccCA	CC(C)CC(C(=O)O)NC(=O)OCC1C2=CC=CC=C2C3=CC=CC=C13	114360-54-2
Cycle1	ggtgaatgtAG	acattcaccCA	CSCCC(C(=O)O)NC(=O)OCC1C2=CC=CC=C2C3=CC=CC=C13	112883-40-6
Cycle1	actccctctAG	agagggagtCA	C1=CC=C(C=C1)CC(C(=O)O)NC(=O)OCC2C3=CC=CC=C3C4=CC=CC=C24	86123-10-6
Cycle1	tacacgctgAG	cagcgtgtaCA	CCCCC(C(=O)O)NC(=O)OCC1C2=CC=CC=C2C3=CC=CC=C13	112883-41-7
Cycle1	gctttgtgtAG	acacaaagcCA	CC(C)(C)OC(=O)CCC(C(=O)O)NC(=O)OCC1C2=CC=CC=C2C3=CC=CC=C13	104091-08-9
Cycle1	ttgaaggcaAG	tgccttcaaCA	CC(C)C(C(=O)O)NC(=O)OCC1C2=CC=CC=C2C3=CC=CC=C13	84624-17-9
Cycle1	ctgcactaaAG	ttagtgcagCA	CC(C(C(=O)O)NC(=O)OCC1C2=CC=CC=C2C3=CC=CC=C13)OC(C)(C)C	138797-71-4
Cycle1	tgggctctaAG	tagagcccaCA	CC(C)(C)OC1=CC=C(C=C1)CC(C(=O)O)NC(=O)OCC2C3=CC=CC=C3C4=CC=CC=C24	118488-18-9
Cycle1	agaccatctAG	agatggtctCA	C1CC(N(C1)C(=O)OCC2C3=CC=CC=C3C4=CC=CC=C24)C(=O)O	101555-62-8
Cycle1	ccgatgattAG	aatcatcggCA	C1=CC=C(C=C1)CCC(C(=O)O)NC(=O)OCC2C3=CC=CC=C3C4=CC=CC=C24	135994-09-1
Cycle1	caatgtggcAG	gccacattgCA	C1=CC=C2C(=C1)C(C3=CC=CC=C32)COC(=O)NCCC(=O)O	35737-10-1
Cycle1	attagccgaAG	tcggctaatCA	C1CCC(CC1)CC(C(=O)O)NC(=O)OCC2C3=CC=CC=C3C4=CC=CC=C24	135673-97-1
Cycle1	tatgcgtacAG	gtacgcataCA	C	NULL
Cycle2	attaccggcGT	gccggtaatCT	Cl.NCCCCC(N)C(O)=O	70-53-1
Cycle2	aggacaatcGT	gattgtcctCT	Cl.NCCCCC(N)C(O)=O	5680-79-5
Cycle2	aaggtagcaGT	tgctaccttCT	Cl.NCCCCC(N)C(O)=O	942-26-7
Cycle2	tagactcggGT	ccgagtctaCT	Cl.NCCCCC(N)C(O)=O	5003-71-4
Cycle2	gctcacataGT	tatgtgagcCT	Cl.NCCCCC(N)C(O)=O	6276-54-6
Cycle2	gttaaggacGT	gtccttaacCT	NCC(CC1=CC=C(Cl)C=C1)C(O)=O	791615-75-3
Cycle2	ggctctagtGT	actagagccCT	NCCCC(O)=O	56-12-2
Cycle2	acgttcatcGT	gatgaacgtCT	NCCCCCC(O)=O	60-32-2
Cycle2	gacccaatcGT	gattgggtcCT	NCCC(O)=O	107-95-9
Cycle2	gcgctttatGT	ataaagcgcCT	NCC1=CC=C(C=C1)C(O)=O	56-91-7
Cycle2	gataggcgaGT	tcgcctatcCT	NCC1=CC=CC(=C1)Br	10269-01-9
Cycle2	gatatgctcGT	gagcatatcCT	NCCC1=CC=C(Br)C=C1	73918-56-6
Cycle2	aggagtagcGT	gctactcctCT	NCC1=C(Br)C=CC=C1	3959-05-5
Cycle2	gaccaggatGT	atcctggtcCT	NCCC1=CC=CC(=C1)F	404-70-6
Cycle2	cgaggttacGT	gtaacctcgCT	NCC1=CC=C(F)C=C1	140-75-0
Cycle2	agacaatggGT	ccattgtctCT	NCC1=C(F)C=CC=C1	89-99-6
Cycle2	tggcatgtgGT	cacatgccaCT	NCC1=CC=CC(=C1)F	100-82-3
Cycle2	gtcaatggcGT	gccattgacCT	NCC1=C(F)C=C(F)C=C1	72235-52-0
Cycle2	cctcctacaGT	tgtaggaggCT	NCC(O)C1=CC=CC=C1Cl	23496-56-2
Cycle2	tgctgaggaGT	tcctcagcaCT	NCC1=CC(=CC=C1Cl)Cl	10541-69-2
Cycle2	ataccgtccGT	ggacggtatCT	NCCC1=CC=C(Cl)C=C1	156-41-2
Cycle2	tgacagaggGT	cctctgtcaCT	NCC1=CC=C(Cl)C=C1	104-86-9
Cycle2	gcgtatcatGT	atgatacgcCT	NCCOC1=C(Cl)C=CC=C1	26378-53-0
Cycle2	atctacctcGT	gaggtagatCT	NCCC1=CC=CC=C1Cl	13078-80-3
Cycle2	tcgattcacGT	gtgaatcgaCT	NCC1=CC(=C(Cl)C=C1)Cl	102-49-8
Cycle2	tccaaaggtGT	acctttggaCT	NCCC1=CC=C(O)C=C1	51-67-2
Cycle2	ataaccaggGT	cctggttatCT	NCCC1=CC=CC=C1O	2039-66-9
Cycle2	agcaacttgGT	caagttgctCT	NCC1=CC=CC=C1O	932-30-9
Cycle2	tggatcgacGT	gtcgatccaCT	NCC#C	2450-71-7
Cycle2	taccgggtaGT	tacccggtaCT	NCC1=CC(=CC=C1)C#N	10406-24-3
Cycle2	gccatcaagGT	cttgatggcCT	NCCC1=NN=N[NH]1	31602-64-9
Cycle2	ctaagccacGT	gtggcttagCT	NCC1=N[NH]N=N1	31602-63-8
Cycle2	tgggctttcGT	gaaagcccaCT	NCC[N]1C=CC=N1	101395-71-5
Cycle2	cgtaggtgaGT	tcacctacgCT	C[N]1N=C(CN)C=C1C	423768-52-9
Cycle2	ggtattccaGT	tggaataccCT	NCC1=N[NH]C(=C1)C2=CC=CC=C2	936940-08-8
Cycle2	tacattcccGT	gggaatgtaCT	NCC1=CC=CC=C1[N]2C=CC=N2	449758-13-8
Cycle2	cgtatcaagGT	cttgatacgCT	NCC1=CN=C(C=C1)[N]2C=CC=N2	956191-88-1
Cycle2	gagtgatagGT	ctatcactcCT	NCC1=CC=NC=C1	3731-53-1
Cycle2	actgctaacGT	gttagcagtCT	NCCC1=NC=CC=C1	2706-56-1
Cycle2	actctctgtGT	acagagagtCT	NCC1=NC=CC=C1	3731-51-9
Cycle2	acattgcgaGT	tcgcaatgtCT	NCC1=CC=C(N=C1)C(F)(F)F	387350-39-2
Cycle2	ctattctgcGT	gcagaatagCT	C[N]1C=NC=C1CN	486414-86-2
Cycle2	acgctagtgGT	cactagcgtCT	NCC1=CC2=C(C=C1)N=CC=C2	99071-54-2
Cycle2	atcgggatcGT	gatcccgatCT	NCC1=CC2=C([NH]C=C2)C=C1	81881-74-5
Cycle2	actctcgctGT	agcgagagtCT	NCCC1=C[NH]C2=CC=CC=C12	61-54-1
Cycle2	taagtggctGT	agccacttaCT	NCCC1=CC=CS1	30433-91-1
Cycle2	aaccagcttGT	aagctggttCT	NCC1=CC=CC(=C1)C2=NN=N[NH]2	765877-97-2
Cycle2	agaagtggtGT	accacttctCT	NCC1=C2OC(F)(F)OC2=CC=C1	531508-46-0
Cycle2	atgaacacgGT	cgtgttcatCT	NCCC1=NC2=CC=CC=C2[NH]1	29518-68-1
Cycle2	aaggttggtGT	accaaccttCT	C1=COC(=C1)CN	617-89-0
Cycle2	acctactccGT	ggagtaggtCT	NCC1=CN=CC=C1	3731-52-0
Cycle2	gagggaacaGT	tgttccctcCT	CCNCCN	110-72-5
Cycle2	ctgtctaacGT	gttagacagCT	CC(C)(C)OC(=O)NCCCN	75178-96-0
Cycle2	ctgccaaatGT	atttggcagCT	CC(C)(C)OC(=O)NCCCCN	68076-36-8
Cycle2	cgggatacaGT	tgtatcccgCT	CC(C)(C)OC(=O)NCCN	57260-73-8
Cycle2	cactacaggGT	cctgtagtgCT	CN(CCN)C(=O)OC(C)(C)C	121492-06-6
Cycle2	tttccatggGT	ccatggaaaCT	C(CCN)CN	110-60-1
Cycle2	actcacctgGT	caggtgagtCT	C1=CC=C(C(=C1)CN)N	4403-69-4
Cycle2	ggacgtgtaGT	tacacgtccCT	C1=CC(=CC(=C1)N)CN	4403-70-7
Cycle2	gttagggacGT	gtccctaacCT	CC(C)(C)OC(=O)CC1CC(CCN)OC(C)(C)O1	125995-13-3
Cycle2	cataggtacGT	gtacctatgCT	NULL	NULL
