# Supplementary material for: Diversified strategy for the synthesis of DNA-encoded oxindole libraries
Source: Royal Society of Chemistry journal article supplement (doi:10.1039/d0sc06696f), 2021-01-01
Supplement: d0sc06696f7.xlsx [file d0sc06696f7.xlsx]

## Sheet: Sheet1
			Smiles	CAS
Cycle1	GAATCCCTGAG	CAGGGATTCCA	C#CC[C@@H](NC(OCC1C2=CC=CC=C2C3=CC=CC=C31)=O)CC(O)=O	332064-94-5
Cycle1	GAGTTCCTCAG	GAGGAACTCCA	FC=1C=CC(=CC1)C[C@H](CC(O)=O)NC(OCC2C3=CC=CC=C3C4=CC=CC=C42)=O	331763-70-3
Cycle1	CTTCATTGGAG	CCAATGAAGCA	N#CC=1C=CC(=CC1)C[C@@H](CC(O)=O)NC(OCC2C3=CC=CC=C3C4=CC=CC=C42)=O	270065-90-2
Cycle1	TTACGTCCTAG	AGGACGTAACA	FC1=C(F)C(F)=C(F)C(F)=C1C[C@@H](CC(O)=O)NC(OCC2C3=CC=CC=C3C4=CC=CC=C42)=O	270063-43-9
Cycle1	AAGGAAGACAG	GTCTTCCTTCA	C#CC[C@H](NC(OCC1C2=CC=CC=C2C3=CC=CC=C31)=O)CC(O)=O	1217669-02-7
Cycle1	ACACCTGCTAG	AGCAGGTGTCA	FC1=C(F)C(F)=C(F)C(F)=C1C[C@H](CC(O)=O)NC(OCC2C3=CC=CC=C3C4=CC=CC=C42)=O	269398-94-9
Cycle1	CCATGTAGCAG	GCTACATGGCA	O=C(O)[C@H]1C[C@H](C=C1)NC(OCC2C3=CC=CC=C3C4=CC=CC=C42)=O	220497-64-3
Cycle1	ATACGTCCGAG	CGGACGTATCA	ClC1=CC2=C(C=C1)C(C[C@H](C(O)=O)NC(OCC3C4=CC=CC=C4C5=CC=CC=C53)=O)=CN2	925916-73-0
Cycle1	CCACCTACTAG	AGTAGGTGGCA	N#CC=1C=CC(=CC1)C[C@H](CC(O)=O)NC(OCC2C3=CC=CC=C3C4=CC=CC=C42)=O	269726-87-6
Cycle1	AGTGGGATGAG	CATCCCACTCA	O=C(O)[C@@H](NC(OCC1C2=CC=CC=C2C3=CC=CC=C31)=O)CCC4CCCCC4	269078-73-1
Cycle1	GACCGGATTAG	AATCCGGTCCA	C1=CC=C2CN([C@@H](CC2=C1)C(=O)O)C(=O)OCC3C4=CC=CC=C4C5=CC=CC=C53	136030-33-6
Cycle1	GAACGCCTTAG	AAGGCGTTCCA	ClC=1C=CC(=CC1)C[C@H](C(O)=O)NC(OCC2C3=CC=CC=C3C4=CC=CC=C42)=O	142994-19-2
Cycle1	ATCGCGTACAG	GTACGCGATCA	N#CC=1C=CC(=CC1)C[C@H](C(O)=O)NC(OCC2C3=CC=CC=C3C4=CC=CC=C42)=O	205526-34-7
Cycle1	GTTCGGTACAG	GTACCGAACCA	C1=CC=C2C(=C1)C3=CC=CC=C3C2COC(=O)N4CCCC[C@@H]4C(=O)O	101555-63-9
Cycle1	ATGTCGGAAAG	TTCCGACATCA	O=C(O)[C@H](NC(OCC1C2=CC=CC=C2C3=CC=CC=C31)=O)C4CCCCC4	198543-96-3
Cycle1	GAAGAGCGTAG	ACGCTCTTCCA	O=C(O)[C@H](NC(OCC1C2=CC=CC=C2C3=CC=CC=C31)=O)CCC4CCCCC4	269078-72-0
Cycle1	CAAAGCCGTAG	ACGGCTTTGCA	O=C([C@@H]1C[C@H](NC(OCC2C3=C(C4=C2C=CC=C4)C=CC=C3)=O)CC1)O	220497-66-5
Cycle1	AGGATGTTGAG	CAACATCCTCA	C1=CC=C2C(=C1)C3=CC=CC=C3C2COC(=O)N4CC(C4)C(=O)O	193693-64-0
Cycle1	CGATTGAGAAG	TCTCAATCGCA	C1=CC=C2C(=C1)C3=CC=CC=C3C2COC(=O)N4CCC[C@H]4C(=O)N5CCC[C@H]5C(=O)O	129223-22-9
Cycle1	AGGCTGTTGAG	CAACAGCCTCA	O=C(O)[C@H](CC1=CSC=C1)NC(OCC2C3=CC=CC=C3C4=CC=CC=C42)=O	186320-06-9
Cycle1	GTGTTCTCTAG	AGAGAACACCA	ClC1=CC2=C(C=C1)C(C[C@@H](C(O)=O)NC(OCC3C4=CC=CC=C4C5=CC=CC=C53)=O)=CN2	908847-42-7
Cycle1	CTCATTACGAG	CGTAATGAGCA	O=C(O)[C@H](CC1=CSC=N1)NC(OCC2C3=CC=CC=C3C4=CC=CC=C42)=O	205528-32-1
Cycle1	TTAGAACGGAG	CCGTTCTAACA	CN([C@@H](CC1CCCCC1)C(=O)O)C(=O)OCC2C3=CC=CC=C3C4=CC=CC=C42	148983-03-3
Cycle1	TCTATCCCTAG	AGGGATAGACA	O=C(O)[C@H](CC1=CC=CO1)NC(OCC2C3=CC=CC=C3C4=CC=CC=C42)=O	159611-02-6
Cycle1	ACGTTCAGAAG	TCTGAACGTCA	O=C(O)[C@H](NC(OCC1C2=CC=CC=C2C3=CC=CC=C31)=O)CC=4C=CC(=CC4)C5=CC=CC=C5	205526-38-1
Cycle1	AAGTCACACAG	GTGTGACTTCA	O=C(O)C1CCC(CC1)CNC(OCC2C3=CC=CC=C3C4=CC=CC=C42)=O	188715-40-4
Cycle1	CAGCTAAAGAG	CTTTAGCTGCA	C=CCC(C(O)=O)(NC(OCC1C2=CC=CC=C2C3=CC=CC=C31)=O)CC=C	1311992-97-8
Cycle1	TGGAAACCGAG	CGGTTTCCACA	O=C(O)C[C@H](C1=CC([N+]([O-])=O)=CC=C1)NC(OCC2C3=CC=CC=C3C4=CC=CC=C42)=O	374791-04-5
Cycle1	TTCCGAGAGAG	CTCTCGGAACA	NC(NCCC[C@H](C(O)=O)NC(OCC1C2=CC=CC=C2C3=CC=CC=C31)=O)=O	200344-33-8
Cycle1	CCTTATGCTAG	AGCATAAGGCA	O=C(O)C[C@H](C1=CC=C(Br)C=C1)NC(OCC2C3=CC=CC=C3C4=CC=CC=C42)=O	220498-04-4
Cycle1	CCACAATCGAG	CGATTGTGGCA	CC1=CC=CC=C1[C@H](NC(OCC2C3=CC=CC=C3C4=CC=CC=C42)=O)CC(O)=O	507472-27-7
Cycle1	TGGTGTGAGAG	CTCACACCACA	O=C(O)C[C@H](C1=CC=C(C(F)(F)F)C=C1)NC(OCC2C3=CC=CC=C3C4=CC=CC=C42)=O	517905-88-3
Cycle1	TGACGTAGCAG	GCTACGTCACA	O=C(O)CC(C1=CC=C(Br)C=C1)NC(OCC2C3=CC=CC=C3C4=CC=CC=C42)=O	269078-76-4
Cycle1	GTAGGTTTGAG	CAAACCTACCA	CC1=CC=C(C(NC(OCC2C3=CC=CC=C3C4=CC=CC=C42)=O)CC(O)=O)C=C1	284492-08-6
Cycle1	CACTTGTTCAG	GAACAAGTGCA	C1=CC=C(C=C1)C[C@@H](C(=O)N2CCC[C@H]2C(=O)O)NC(=O)OCC3C4=C(C=CC=C4)C5=C3C=CC=C5	138372-76-6
Cycle1	ATGAGCTGCAG	GCAGCTCATCA	C=CCC(NC(OCC1C2=CC=CC=C2C3=CC=CC=C31)=O)C(O)=O	221884-63-5
Cycle1	GAATAGGCCAG	GGCCTATTCCA	C1CCC2C(C1)C[C@H](C(=O)O)N2C(=O)OCC3C4=CC=CC=C4C5=CC=CC=C53	1217512-55-4
Cycle1	GTACATCAGAG	CTGATGTACCA	O=C(O)C[C@@H](CC1=CC=CS1)NC(OCC2C3=CC=CC=C3C4=CC=CC=C42)=O	270262-98-1
Cycle1	AGGCGTTCAAG	TGAACGCCTCA	C=CC[C@@H](NC(OCC1C2=CC=CC=C2C3=CC=CC=C31)=O)C(O)=O	170642-28-1
Cycle1	GAGAATGCTAG	AGCATTCTCCA	C#CCCC[C@@H](C(=O)O)NC(=O)OCC1C2=C(C=CC=C2)C3=C1C=CC=C3	1097192-05-6
Cycle1	TCACGATCCAG	GGATCGTGACA	FC1=C(F)C(F)=C(F)C(F)=C1C[C@@H](C(O)=O)NC(OCC2C3=CC=CC=C3C4=CC=CC=C42)=O	205526-32-5
Cycle1	ACGGGAACAAG	TGTTCCCGTCA	CC1=CC=C(C[C@H](NC(OCC2C3=CC=CC=C3C4=CC=CC=C42)=O)C(O)=O)C=C1	199006-54-7
Cycle1	CAACGACACAG	GTGTCGTTGCA	CC1=C(C(C)=CC(O)=C1)C[C@H](NC(OCC2C3=CC=CC=C3C4=CC=CC=C42)=O)C(O)=O	206060-54-0
Cycle1	GTAAGGGTCAG	GACCCTTACCA	O=C(O)[C@H](CC1=CSC2=CC=CC=C12)NC(OCC3C4=CC=CC=C4C5=CC=CC=C53)=O	177966-60-8
Cycle1	CACATGACTAG	AGTCATGTGCA	O=C([C@H]1N(C(OCC2C3=C(C4=C2C=CC=C4)C=CC=C3)=O)[C@@]5([H])CCCC[C@@]5([H])C1)O	130309-37-4
Cycle1	ATAGCAGTGAG	CACTGCTATCA	O=C(O)C1=CC=CC(CNC(OCC2C3=CC=CC=C3C4=CC=CC=C42)=O)=C1	155369-11-2
Cycle1	TCCAGACATAG	ATGTCTGGACA	FC1=CC(C[C@H](C(O)=O)NC(OCC2C3=CC=CC=C3C4=CC=CC=C42)=O)=CC(F)=C1F	205526-31-4
Cycle1	TCAATCAGGAG	CCTGATTGACA	ClC=1C=CC(=CC1Cl)C[C@@H](C(O)=O)NC(OCC2C3=CC=CC=C3C4=CC=CC=C42)=O	177966-59-5
Cycle1	TCCCGAACTAG	AGTTCGGGACA	C1=CC=C2C(=C1)C3=CC=CC=C3C2COC(=O)N4CCC(C4)C(=O)O	885951-89-3
Cycle1	GTAAGAGAGAG	CTCTCTTACCA	IC=1C=CC(=CC1)C[C@@H](C(O)=O)NC(OCC2C3=CC=CC=C3C4=CC=CC=C42)=O	82565-68-2
Cycle1	CTCGCAACTAG	AGTTGCGAGCA	IC=1C=CC(=CC1)C[C@H](C(O)=O)NC(OCC2C3=CC=CC=C3C4=CC=CC=C42)=O	205526-29-0
Cycle1	GTTGGCTTGAG	CAAGCCAACCA	C1=CC=C2C(=C1)C[C@@H](C(=O)O)N2C(=O)OCC3C4=CC=CC=C4C5=CC=CC=C53	198560-38-2
Cycle1	TCTTCAGGGAG	CCCTGAAGACA	O=[N+]([O-])C=1C=CC(=C(C1)[N+]([O-])=O)NC[C@@H](C(O)=O)NC(OCC2C3=CC=CC=C3C4=CC=CC=C42)=O	140430-54-2
Cycle1	GAAGTATGCAG	GCATACTTCCA	O=C(O)[C@@H](CC1=CSC2=CC=CC=C12)NC(OCC3C4=CC=CC=C4C5=CC=CC=C53)=O	177966-61-9
Cycle1	CTAAGTCACAG	GTGACTTAGCA	O=C(O)[C@H](CC1CC1)NC(OCC2C3=CC=CC=C3C4=CC=CC=C42)=O	214750-76-2
Cycle1	AGAGTAAGGAG	CCTTACTCTCA	O=C(O)C[C@H](CC1=CC=CO1)NC(OCC2C3=CC=CC=C3C4=CC=CC=C42)=O	270263-07-5
Cycle1	GTTTACCCCAG	GGGGTAAACCA	O=C(O)C1(NC(OCC2C3=CC=CC=C3C4=CC=CC=C42)=O)CCCCC1	162648-54-6
Cycle1	CTTTCGGGAAG	TCCCGAAAGCA	FC1=CC2=C(C=C1)C(CC(C(O)=O)NC(OCC3C4=CC=CC=C4C5=CC=CC=C53)=O)=CN2	1219392-55-8
Cycle1	CTAGGGAGTAG	ACTCCCTAGCA	ClC=1C=CC(=CC1Cl)C[C@H](C(O)=O)NC(OCC2C3=CC=CC=C3C4=CC=CC=C42)=O	177966-58-4
Cycle1	GTAAAGCTCAG	GAGCTTTACCA	BrC=1C=CC(=CC1)C[C@@H](C(O)=O)NC(OCC2C3=CC=CC=C3C4=CC=CC=C42)=O	198561-04-5
Cycle1	CCTACTTGCAG	GCAAGTAGGCA	O=[N+]([O-])C=1C=CC(=CC1)C[C@H](C(O)=O)NC(OCC2C3=CC=CC=C3C4=CC=CC=C42)=O	177966-63-1
Cycle1	AAGCTCGTAAG	TACGAGCTTCA	O=C(O)C[C@@H](NC(OCC1C2=CC=CC=C2C3=CC=CC=C31)=O)C/C=C/C4=CC=CC=C4	1217460-65-5
Cycle1	ACGATTAGCAG	GCTAATCGTCA	O=C(O)[C@@H](CC1=CN=CC=C1)NC(OCC2C3=CC=CC=C3C4=CC=CC=C42)=O	142994-45-4
Cycle1	AACGGAGTAAG	TACTCCGTTCA	O=C(O)[C@@H](NC(OCC1C2=CC=CC=C2C3=CC=CC=C31)=O)C4CCCC4	220497-61-0
Cycle1	CAACTGAAGAG	CTTCAGTTGCA	O=C(O)C=1C=CC(=CC1)CNC(OCC2C3=CC=CC=C3C4=CC=CC=C42)=O	164470-64-8
Cycle1	AAGAATGGCAG	GCCATTCTTCA	O=C(O)C1(CCCC1)NC(OCC2C3=CC=CC=C3C4=CC=CC=C42)=O	117322-30-2
Cycle1	AGGGGAACAAG	TGTTCCCCTCA	O=C(O)C1(CCC1)NC(OCC2C3=CC=CC=C3C4=CC=CC=C42)=O	885951-77-9
Cycle1	CGCGAATATAG	ATATTCGCGCA	FC(F)(F)C=1C=CC(=CC1)C[C@@H](C(O)=O)NC(OCC2C3=CC=CC=C3C4=CC=CC=C42)=O	247113-86-6
Cycle1	AAGTCGGATAG	ATCCGACTTCA	C1=CC=C2C(=C1)C3=CC=CC=C3C2COC(=O)N4CC5=CC(=CC=C5C[C@H]4C(=O)O)O	178432-49-0
Cycle1	GTTCTGCTTAG	AAGCAGAACCA	COC1=C(OC)C=C(C[C@H](NC(OCC2C3=CC=CC=C3C4=CC=CC=C42)=O)C(O)=O)C=C1	184962-88-7
Cycle1	CACCACTTAAG	TAAGTGGTGCA	O=C(O)[C@H](CC1=CC=CS1)NC(OCC2C3=CC=CC=C3C4=CC=CC=C42)=O	130309-35-2
Cycle1	CATGATGAGAG	CTCATCATGCA	OC=1C=CC2=C(C1)C(=CN2)C[C@@H](C(O)=O)NC(OCC3C4=CC=CC=C4C5=CC=CC=C53)=O	178119-94-3
Cycle1	CACGATCATAG	ATGATCGTGCA	O=C(O)[C@H]1CCC[C@@H]1NC(OCC2C3=CC=CC=C3C4=CC=CC=C42)=O	359586-64-4
Cycle1	GCCCTATTAAG	TAATAGGGCCA	O=C(O)C[C@H](CC1=CSC=C1)NC(OCC2C3=CC=CC=C3C4=CC=CC=C42)=O	270263-01-9
Cycle1	GACCTTTGGAG	CCAAAGGTCCA	O=C(O)C1(CCOCC1)NC(OCC2C3=CC=CC=C3C4=CC=CC=C42)=O	285996-72-7
Cycle1	ATGCCTCCTAG	AGGAGGCATCA	O=C(O)[C@H](C1=CSC=C1)NC(OCC2C3=CC=CC=C3C4=CC=CC=C42)=O	1217706-09-6
Cycle1	TGTTCAGGCAG	GCCTGAACACA	O=C(O)C1(CC1)NC(OCC2C3=CC=CC=C3C4=CC=CC=C42)=O	126705-22-4
Cycle1	TTCCCAGTAAG	TACTGGGAACA	C1=CC=C2C(=C1)C3=CC=CC=C3C2COC(=O)NC4=CC=C(C=C4)C(=O)O	185116-43-2
Cycle1	GGACTTCGAAG	TCGAAGTCCCA	C#CC[C@@H](NC(OCC1C2=CC=CC=C2C3=CC=CC=C31)=O)C(O)=O	220497-98-3
Cycle1	TAAGAAGCGAG	CGCTTCTTACA	C#CC[C@H](NC(OCC1C2=CC=CC=C2C3=CC=CC=C31)=O)C(O)=O	198561-07-8
Cycle1	CTAGCGGTTAG	AACCGCTAGCA	ClC=1C=CC(=C(C1)Cl)C[C@@H](C(O)=O)NC(OCC2C3=CC=CC=C3C4=CC=CC=C42)=O	352351-62-3
Cycle1	TGCGATCAGAG	CTGATCGCACA	FC1=CC(C[C@@H](C(O)=O)NC(OCC2C3=CC=CC=C3C4=CC=CC=C42)=O)=CC(F)=C1F	205526-30-3
Cycle1	CGCAAAGACAG	GTCTTTGCGCA	O=C(O)[C@H](CC1=CN=CC=C1)NC(OCC2C3=CC=CC=C3C4=CC=CC=C42)=O	175453-07-3
Cycle1	CCCGGTTATAG	ATAACCGGGCA	O=C(O)[C@H](NC(OCC1C2=CC=CC=C2C3=CC=CC=C31)=O)C4CCCC4	136555-16-3
Cycle1	CCGAATAGGAG	CCTATTCGGCA	O=C(O)[C@@H](NC(OCC1C2=CC=CC=C2C3=CC=CC=C31)=O)CCCNC(OCC4=CC=CC=C4)=O	138775-07-2
Cycle1	GGCCAGTTTAG	AAACTGGCCCA	FC(F)(F)C(NCCCC[C@@H](C(O)=O)NC(OCC1C2=CC=CC=C2C3=CC=CC=C31)=O)=O	76265-69-5
Cycle1	ACTAGTACCAG	GGTACTAGTCA	O=C(CC[C@H](NC(OCC1C2=CC=CC=C2C3=CC=CC=C31)=O)C(O)=O)OC4CCCCC4	150047-85-1
Cycle1	ACCTATCTCAG	GAGATAGGTCA	[N-]=[N+]=NCCC[C@@H](C(O)=O)NC(OCC1C2=CC=CC=C2C3=CC=CC=C31)=O	1097192-04-5
Cycle1	AGGAGCAGTAG	ACTGCTCCTCA	C#CC[C@](C(O)=O)(NC(OCC1C2=CC=CC=C2C3=CC=CC=C31)=O)C	1198791-65-9
Cycle1	GCTCGAAGAAG	TCTTCGAGCCA	C[C@@H](OCC1=CC=CC=C1)[C@H](NC(OCC2C3=CC=CC=C3C4=CC=CC=C42)=O)C(O)=O	117872-75-0
Cycle1	CAGAATCCCAG	GGGATTCTGCA	O=C(O)C[C@H](C1=CC=C([N+]([O-])=O)C=C1)NC(OCC2C3=CC=CC=C3C4=CC=CC=C42)=O	507472-26-6
Cycle1	ACGCTCCAAAG	TTGGAGCGTCA	COC1=CC(OC)=CC([C@H](NC(OCC2C3=CC=CC=C3C4=CC=CC=C42)=O)CC(O)=O)=C1	511272-41-6
Cycle1	TCTCCGATCAG	GATCGGAGACA	O=C(O)C[C@H](C1=CN=CC=C1)NC(OCC2C3=CC=CC=C3C4=CC=CC=C42)=O	511272-43-8
Cycle1	GTCAAAGAGAG	CTCTTTGACCA	O=C(O)C[C@H](C1=CC=CS1)NC(OCC2C3=CC=CC=C3C4=CC=CC=C42)=O	511272-45-0
Cycle1	CGTTCGTATAG	ATACGAACGCA	O=C(O)C[C@H](C1=CC=CO1)NC(OCC2C3=CC=CC=C3C4=CC=CC=C42)=O	1217662-55-9
Cycle1	TAGTAGGAGAG	CTCCTACTACA	CC(C1=CC=C(C[C@H](NC(OCC2C3=CC=CC=C3C4=CC=CC=C42)=O)C(O)=O)C=C1)=O	204716-07-4
Cycle1	CCGTTACACAG	GTGTAACGGCA	O=C(O)C1=CC(NC(OCC2C3=CC=CC=C3C4=CC=CC=C42)=O)=C(N)C=C1	1071446-05-3
Cycle1	AGAGATTCGAG	CGAATCTCTCA	C1(C2=C(C=CC=C2)C3=C1C=CC=C3)COC(N[C@H](C(=O)O)C4=CC=C(C=C4)OC)=O	1260596-73-3
Cycle1	GAGTGGACTAG	AGTCCACTCCA	O=C(O)[C@H](CC1=CNC2=C1C=CC=N2)NC(OCC3C4=CC=CC=C4C5=CC=CC=C53)=O	737007-45-3
Cycle1	TTATGGCCGAG	CGGCCATAACA	N1([C@H](C(=O)O)C[C@H](C1)F)C(=O)OCC1c2c(cccc2)c2c1cccc2	1228307-81-0
Cycle1	GTAGCCTGTAG	ACAGGCTACCA	FC1=CC(C[C@H](C(O)=O)NC(OCC2C3=CC=CC=C3C4=CC=CC=C42)=O)=CC(F)=C1	205526-25-6
Cycle1	TGGCGTTTTAG	AAAACGCCACA	FC=1C=CC(=C(C1)F)C[C@@H](C(O)=O)NC(OCC2C3=CC=CC=C3C4=CC=CC=C42)=O	1032337-49-7
Cycle1	TACTCGGGAAG	TCCCGAGTACA	C1=CC=C2C(=C1)C3=CC=CC=C3C2COC(=O)N4CSC[C@H]4C(=O)O	133054-21-4
Cycle1	TGAGTTCAGAG	CTGAACTCACA	C1(C2=C(C=CC=C2)C3=C1C=CC=C3)COC(N([C@H](C(=O)O)CC4=CC=C(C=C4)Cl)C)=O	1217716-50-1
Cycle1	TATGTGGGGAG	CCCCACATACA	O=C(O)C1(NC(OCC2C3=CC=CC=C3C4=CC=CC=C42)=O)CC5=CC=CC=C5C1	135944-07-9
Cycle1	AGGGTCCTTAG	AAGGACCCTCA	O=C(O)[C@H](CC1CCC1)NC(OCC2C3=CC=CC=C3C4=CC=CC=C42)=O	478183-62-9
Cycle1	AGCCAACTTAG	AAGTTGGCTCA	O=C(O)[C@@H]1CCC[C@H]1NC(OCC2C3=CC=CC=C3C4=CC=CC=C42)=O	359586-69-9
Cycle1	GCACATATCAG	GATATGTGCCA	O=C(O)CC1(NC(OCC2C3=CC=CC=C3C4=CC=CC=C42)=O)CCCCC1	282524-98-5
Cycle1	AGCATCGCTAG	AGCGATGCTCA	O=C(O)CC1(CNC(OCC2C3=CC=CC=C3C4=CC=CC=C42)=O)CCCCC1	882847-19-0
Cycle1	GCTGCGATTAG	AATCGCAGCCA	O=C(O)[C@@H]1CC[C@H](CC1)CNC(OCC2C3=CC=CC=C3C4=CC=CC=C42)=O	167690-53-1
Cycle1	CGTCTCACTAG	AGTGAGACGCA	O=[N+]([O-])C=1C=CC(=CC1)C[C@@H](C(O)=O)NC(OCC2C3=CC=CC=C3C4=CC=CC=C42)=O	95753-55-2
Cycle1	CCTGTGCATAG	ATGCACAGGCA	C1=CC=C2C(=C1)C3=CC=CC=C3C2COC(=O)N4CCCC[C@H]4C(=O)O	86069-86-5
Cycle1	CTCGACTTAAG	TAAGTCGAGCA	O=C(O)[C@@H]1CC[C@H](CC1)NC(OCC2C3=CC=CC=C3C4=CC=CC=C42)=O	147900-46-7
Cycle1	ACTTCGCACAG	GTGCGAAGTCA	CC1(OCC2=C(O1)C=CC(C[C@H](NC(OCC3C4=CC=CC=C4C5=CC=CC=C53)=O)C(O)=O)=C2)C	252049-13-1
Cycle1	TGTTCCGGTAG	ACCGGAACACA	IC=1C=CC(=CC1)C[C@H](CC(O)=O)NC(OCC2C3=CC=CC=C3C4=CC=CC=C42)=O	269396-73-8
Cycle1	GCCTTAATCAG	GATTAAGGCCA	BrC=1C=CC(=CC1)C[C@@H](CC(O)=O)NC(OCC2C3=CC=CC=C3C4=CC=CC=C42)=O	270062-86-7
Cycle1	TGCGACGATAG	ATCGTCGCACA	ClC=1C=CC(=CC1Cl)C[C@@H](CC(O)=O)NC(OCC2C3=CC=CC=C3C4=CC=CC=C42)=O	270063-52-0
Cycle1	AGATGAGAGAG	CTCTCATCTCA	IC=1C=CC(=CC1)C[C@@H](CC(O)=O)NC(OCC2C3=CC=CC=C3C4=CC=CC=C42)=O	270065-72-0
Cycle1	TGCCCTAGAAG	TCTAGGGCACA	O=C(O)C[C@H](CC1=CNC2=CC=CC=C12)NC(OCC3C4=CC=CC=C4C5=CC=CC=C53)=O	353245-98-4
Cycle1	TGAAGACACAG	GTGTCTTCACA	O=C(O)C[C@@H](C1=CC=C(F)C=C1)NC(OCC2C3=CC=CC=C3C4=CC=CC=C42)=O	479064-89-6
Cycle1	TCCAGTGACAG	GTCACTGGACA	O=C(O)C[C@@H](C1=C(Cl)C(Cl)=CC=C1)NC(OCC2C3=CC=CC=C3C4=CC=CC=C42)=O	501015-35-6
Cycle1	TTCACCACTAG	AGTGGTGAACA	O=C(O)C[C@H](C1=C(Cl)C=C(Cl)C=C1)NC(OCC2C3=CC=CC=C3C4=CC=CC=C42)=O	511272-37-0
Cycle1	TAGGCATCCAG	GGATGCCTACA	O=C(O)[C@@H](NC(OCC1C2=CC=CC=C2C3=CC=CC=C31)=O)C4CCCCC4	161321-36-4
Cycle1	GCGTATTCGAG	CGAATACGCCA	O=C(O)[C@@H](NC(OCC1C2=CC=CC=C2C3=CC=CC=C31)=O)CC4=CC=CC=C4F	205526-26-7
Cycle1	TAGCCTTTGAG	CAAAGGCTACA	FC=1C=CC(=CC1F)C[C@H](C(O)=O)NC(OCC2C3=CC=CC=C3C4=CC=CC=C42)=O	198545-59-4
Cycle1	CTTCGCATCAG	GATGCGAAGCA	FC=1C=CC(=CC1)C[C@@H](C(O)=O)NC(OCC2C3=CC=CC=C3C4=CC=CC=C42)=O	169243-86-1
Cycle1	CGAATTGCTAG	AGCAATTCGCA	C1=CC=C2CN([C@H](CC2=C1)C(=O)O)C(=O)OCC3C4=CC=CC=C4C5=CC=CC=C53	130309-33-0
Cycle1	CACGTCTCAAG	TGAGACGTGCA	O=C(O)[C@H](NC(OCC1C2=CC=CC=C2C3=CC=CC=C31)=O)CC4=CC=CC=C4Cl	205526-22-3
Cycle1	TCATGGGTAAG	TACCCATGACA	N#CC=1C=CC(=CC1)C[C@@H](C(O)=O)NC(OCC2C3=CC=CC=C3C4=CC=CC=C42)=O	173963-93-4
Cycle1	GATCACCGTAG	ACGGTGATCCA	CC(C)(OC(N1CCCC(C1)CC(NC(OCC2C3=CC=CC=C3C4=CC=CC=C42)=O)C(O)=O)=O)C	457060-97-8
Cycle1	GATCCGATAAG	TATCGGATCCA	C[C@]1(CCCN1C(=O)OCC2C3=CC=CC=C3C4=CC=CC=C42)C(=O)O	167275-47-0
Cycle1	CACAGTTGAAG	TCAACTGTGCA	C(F)(C1=CC=C(C[C@@H](C(O)=O)NC(=O)OCC2C3=C(C4=C2C=CC=C4)C=CC=C3)C=C1)F	1808268-08-7
Cycle1	TAGAATCCGAG	CGGATTCTACA	C1CN(C[C@@H](C(=O)O)NC(OCC2C3=C(C4=C2C=CC=C4)C=CC=C3)=O)CCO1	1251903-85-1
Cycle1	TGATCTGACAG	GTCAGATCACA	C1=CC=C2C(=C1)C3=CC=CC=C3C2COC(=O)N4CCC[C@@H]4CC(=O)O	193693-61-7
Cycle1	CTTGCCACTAG	AGTGGCAAGCA	C1=CC=C2C(=C1)C3=CC=CC=C3C2COC(=O)N4CC[C@@H]4C(=O)O	374791-02-3
Cycle1	CTATGTGTCAG	GACACATAGCA	O=C(O)C1(NC(OCC2C3=CC=CC=C3C4=CC=CC=C42)=O)CCC5=CC=CC=C51	214139-28-3
Cycle1	TCTGATGCGAG	CGCATCAGACA	C1=CC=C2C(=C1)CN(C2C(=O)O)C(=O)OCC3C4=CC=CC=C4C5=CC=CC=C53	204320-59-2
Cycle1	CGGTTTAAGAG	CTTAAACCGCA	O=C(O)[C@@H](NC(OCC1C2=CC=CC=C2C3=CC=CC=C31)=O)C/C=C/C4=CC=CC=C4	159610-82-9
Cycle1	GGAATCTACAG	GTAGATTCCCA	C1CC[C@H]2[C@@H](C1)C[C@@H](C(=O)O)N2C(=O)OCC3C4=CC=CC=C4C5=CC=CC=C53	214750-71-7
Cycle1	ACCCGAAGAAG	TCTTCGGGTCA	CC(C)(C)OC(=O)N1CCN(C1C(=O)O)C(=O)OCC2C3=CC=CC=C3C4=CC=CC=C42	207129-12-2
Cycle1	TTATCCCCCAG	GGGGGATAACA	C1(C2=C(C=CC=C2)C3=C1C=CC=C3)COC(NCC(C(=O)O)C4=CC=C(C=C4)Cl)=O	683217-64-3
Cycle1	CCTTCAGACAG	GTCTGAAGGCA	FC=1C=CC(=CC1F)C[C@@H](C(O)=O)NC(OCC2C3=CC=CC=C3C4=CC=CC=C42)=O	198560-43-9
Cycle1	TGACCACCAAG	TGGTGGTCACA	CC1=CC=CC=C1C[C@H](NC(OCC2C3=CC=CC=C3C4=CC=CC=C42)=O)C(O)=O	211637-75-1
Cycle1	CTGCTACTAAG	TAGTAGCAGCA	FC(F)(F)C=1C=CC(=CC1)C[C@H](C(O)=O)NC(OCC2C3=CC=CC=C3C4=CC=CC=C42)=O	238742-88-6
Cycle1	CCACACTTAAG	TAAGTGTGGCA	C1=CC=C2C(=C1)C3=CC=CC=C3C2COC(=O)N4C[C@H](C[C@@H]4C(=O)O)O	139262-20-7
Cycle1	GCTTCACTTAG	AAGTGAAGCCA	O=C(O)[C@H]1C[C@H](CC1)NC(OCC2C3=CC=CC=C3C4=CC=CC=C42)=O	220497-67-6
Cycle1	GCAAGTTGTAG	ACAACTTGCCA	CC(C)(OC(N1C[C@@H](C(O)=O)[C@H](NC(OCC2C3=CC=CC=C3C4=CC=CC=C42)=O)C1)=O)C	267230-44-4
Cycle1	ACGTTACAGAG	CTGTAACGTCA	C1=CC=C2C(=C1)C3=CC=CC=C3C2COC(=O)N4CCC[C@@H]4COCC(=O)O	1335206-44-4
Cycle1	GTCAGTAGAAG	TCTACTGACCA	C=CCC[C@@H](NC(OCC1C2=CC=CC=C2C3=CC=CC=C31)=O)C(O)=O	865352-21-2
Cycle1	CTCGAATTCAG	GAATTCGAGCA	C1=CC=C2C(=C1)C3=CC=CC=C3C2COC(=O)N4CCOC[C@@H]4C(=O)O	942153-03-9
Cycle1	ATCGTCACGAG	CGTGACGATCA	O=C(O)[C@H](C1CC1)NC(OCC2C3=CC=CC=C3C4=CC=CC=C42)=O	1212257-18-5
Cycle1	AACAACTGCAG	GCAGTTGTTCA	CC(C)(OC(N1CCC(C(NC(OCC2C3=CC=CC=C3C4=CC=CC=C42)=O)C(O)=O)CC1)=O)C	313051-96-6
Cycle1	AAGAGAGCAAG	TGCTCTCTTCA	CC(C)(OC(N1CCCC(C(NC(OCC2C3=CC=CC=C3C4=CC=CC=C42)=O)CC(O)=O)C1)=O)C	372144-11-1
Cycle1	ATCTCTGACAG	GTCAGAGATCA	O=C(O)C[C@@H](C1=CC=C(C#N)C=C1)NC(OCC2C3=CC=CC=C3C4=CC=CC=C42)=O	507472-24-4
Cycle1	GCCTAGAGTAG	ACTCTAGGCCA	CN1C=C(C2=CC=CC=C21)C[C@@H](NC(OCC3C4=CC=CC=C4C5=CC=CC=C53)=O)C(O)=O	168471-22-5
Cycle1	AGTTTCGGGAG	CCCGAAACTCA	FC(F)(F)C=1C=CC(=CC1)C[C@@H](CC(O)=O)NC(OCC2C3=CC=CC=C3C4=CC=CC=C42)=O	270065-81-1
Cycle1	TTACATCCCAG	GGGATGTAACA	FC1=CC=CC(C[C@H](CC(O)=O)NC(OCC2C3=CC=CC=C3C4=CC=CC=C42)=O)=C1	331763-67-8
Cycle1	CCGTATAGTAG	ACTATACGGCA	N#CC1=CC=CC(C[C@H](CC(O)=O)NC(OCC2C3=CC=CC=C3C4=CC=CC=C42)=O)=C1	269726-84-3
Cycle1	GCCCAACTTAG	AAGTTGGGCCA	O=C(O)C[C@H](NC(OCC1C2=CC=CC=C2C3=CC=CC=C31)=O)CC4=CC=CC=C4Cl	268734-29-8
Cycle1	CCTATCAAGAG	CTTGATAGGCA	C1=CC=C2C(=C1)C3=CC=CC=C3C2COC(=O)N4CCC[C@H]4CC(=O)O	193693-60-6
Cycle1	ACCACCAACAG	GTTGGTGGTCA	C1=CC=C2CN([C@H](CC2=C1)CC(=O)O)C(=O)OCC3C4=CC=CC=C4C5=CC=CC=C53	332064-67-2
Cycle1	ACTGATGGGAG	CCCATCAGTCA	ClC=1C=CC(=CC1)C[C@H](CC(O)=O)NC(OCC2C3=CC=CC=C3C4=CC=CC=C42)=O	331763-60-1
Cycle1	AACGGGAATAG	ATTCCCGTTCA	ClC=1C=CC(=C(C1)Cl)C[C@@H](CC(O)=O)NC(OCC2C3=CC=CC=C3C4=CC=CC=C42)=O	270063-49-5
Cycle1	ATGTCTCAGAG	CTGAGACATCA	ClC=1C=CC(=C(C1)Cl)C[C@H](CC(O)=O)NC(OCC2C3=CC=CC=C3C4=CC=CC=C42)=O	269396-54-5
Cycle1	GCTGAATCAAG	TGATTCAGCCA	FC=1C=CC(=CC1)C[C@@H](CC(O)=O)NC(OCC2C3=CC=CC=C3C4=CC=CC=C42)=O	270062-83-4
Cycle1	TGTACTGGCAG	GCCAGTACACA	O=C(O)C[C@H](CC1=CC=CS1)NC(OCC2C3=CC=CC=C3C4=CC=CC=C42)=O	269726-90-1
Cycle1	ACAGAGCCAAG	TGGCTCTGTCA	O=C(O)C[C@H](CC1=CSC2=CC=CC=C12)NC(OCC3C4=CC=CC=C4C5=CC=CC=C53)=O	270063-46-2
Cycle1	ATAGCATGGAG	CCATGCTATCA	BrC=1C=CC(=CC1)C[C@H](CC(O)=O)NC(OCC2C3=CC=CC=C3C4=CC=CC=C42)=O	331763-76-9
Cycle1	CGCATTGGAAG	TCCAATGCGCA	ClC=1C=CC(=CC1)C[C@@H](CC(O)=O)NC(OCC2C3=CC=CC=C3C4=CC=CC=C42)=O	270596-43-5
Cycle1	AAGCGAACGAG	CGTTCGCTTCA	ClC=1C=CC(=CC1Cl)C[C@H](CC(O)=O)NC(OCC2C3=CC=CC=C3C4=CC=CC=C42)=O	269396-57-8
Cycle1	CCGCAAAACAG	GTTTTGCGGCA	FC(F)(F)C=1C=CC(=CC1)C[C@H](CC(O)=O)NC(OCC2C3=CC=CC=C3C4=CC=CC=C42)=O	269726-78-5
Cycle1	TTCCTGCTGAG	CAGCAGGAACA	O=C(O)C[C@H](C1=CC=C(Cl)C=C1)NC(OCC2C3=CC=CC=C3C4=CC=CC=C42)=O	479064-92-1
Cycle1	TCTGGTCTGAG	CAGACCAGACA	O=C(O)C[C@H](C1=CC(Cl)=CC=C1)NC(OCC2C3=CC=CC=C3C4=CC=CC=C42)=O	511272-53-0
Cycle1	TTGGGCATAAG	TATGCCCAACA	C1CCC(C1)C[C@H](C(=O)O)NC(=O)OCC2C3=C(C=CC=C3)C4=C2C=CC=C4	1262802-59-4
Cycle1	GCAGGGAATAG	ATTCCCTGCCA	C=CC[C@H](NC(OCC1C2=CC=CC=C2C3=CC=CC=C31)=O)C(O)=O	146549-21-5
Cycle1	GCTACCATGAG	CATGGTAGCCA	O=[N+]([O-])C=1C=CC(=CC1)C[C@H](CC(O)=O)NC(OCC2C3=CC=CC=C3C4=CC=CC=C42)=O	269398-78-9
Cycle1	GGTTGAAGGAG	CCTTCAACCCA	O=[N+]([O-])C=1C=CC(=CC1)C[C@@H](CC(O)=O)NC(OCC2C3=CC=CC=C3C4=CC=CC=C42)=O	270062-88-9
Cycle1	ACGCGTAAAAG	TTTACGCGTCA	CC(=O)NCSC[C@@H](C(=O)O)NC(=O)OCC1C2=CC=CC=C2C3=CC=CC=C13	86060-81-3
Cycle1	ATGCTCGTGAG	CACGAGCATCA	CC(C)(C)OC(=O)NCCCC[C@@H](C(=O)O)NC(=O)OCC1C2=CC=CC=C2C3=CC=CC=C13	71989-26-9
Cycle1	GGTAAGTTGAG	CAACTTACCCA	C1C[C@H](N(C1)C(=O)OCC2C3=CC=CC=C3C4=CC=CC=C24)C(=O)O	71989-31-6
Cycle1	TCTTGCACGAG	CGTGCAAGACA	CC(C(C(=O)O)NC(=O)OCC1C2=CC=CC=C2C3=CC=CC=C13)OC(C)(C)C	71989-35-0
Cycle1	TACCCGAATAG	ATTCGGGTACA	CSCCC(C(=O)O)NC(=O)OCC1C2=CC=CC=C2C3=CC=CC=C13	71989-28-1
Cycle1	TTGTAGCGCAG	GCGCTACAACA	CC(C)(C)OCC(C(=O)O)NC(=O)OCC1C2=CC=CC=C2C3=CC=CC=C13	128107-47-1
Cycle1	ATTGCGTGCAG	GCACGCAATCA	CC(C)C(C(=O)O)NC(=O)OCC1C2=CC=CC=C2C3=CC=CC=C13	68858-20-8
Cycle1	GTAGTTCCGAG	CGGAACTACCA	CC(C)CC(C(=O)O)NC(=O)OCC1C2=CC=CC=C2C3=CC=CC=C13	35661-60-0
Cycle1	CAGTAGCTAAG	TAGCTACTGCA	C1=CC=C(C=C1)CC(C(=O)O)NC(=O)OCC2C3=CC=CC=C3C4=CC=CC=C24	35661-40-6
Cycle1	CATACGCGTAG	ACGCGTATGCA	CC(C(=O)O)NC(=O)OCC1C2=CC=CC=C2C3=CC=CC=C13	35661-39-3
Cycle1	ACAAGCACTAG	AGTGCTTGTCA	CC(C)(C)OC(=O)CCC(C(=O)O)NC(=O)OCC1C2=CC=CC=C2C3=CC=CC=C13	71989-18-9
Cycle1	CGACATCCTAG	AGGATGTCGCA	CC(C)(C)OC(=O)CC(C(=O)O)NC(=O)OCC1C2=CC=CC=C2C3=CC=CC=C13	71989-14-5
Cycle1	CGAGGAGTTAG	AACTCCTCGCA	C1=CC=C2C(=C1)C(C3=CC=CC=C32)COC(=O)NCC(=O)O	29022-11-5
Cycle1	AAATCAGCCAG	GGCTGATTTCA	CCC(C)C(C(=O)O)NC(=O)OCC1C2=CC=CC=C2C3=CC=CC=C13	71989-23-6
Cycle1	GATCCACATAG	ATGTGGATCCA	COC(=O)CC(C(=O)O)NC(=O)OCC1C2=CC=CC=C2C3=CC=CC=C13	145038-53-5
Cycle1	gggatcctaAG	taggatcccCA	CC(C)(C)OCC(C(=O)O)NC(=O)OCC1C2=CC=CC=C2C3=CC=CC=C13	71989-33-8
Cycle1	cctagatctAG	agatctaggCA	CC(C(=O)O)NC(=O)OCC1C2=CC=CC=C2C3=CC=CC=C13	79990-15-1
Cycle1	acgccctatAG	atagggcgtCA	CC(C)CC(C(=O)O)NC(=O)OCC1C2=CC=CC=C2C3=CC=CC=C13	114360-54-2
Cycle1	atgcccacaAG	tgtgggcatCA	CSCCC(C(=O)O)NC(=O)OCC1C2=CC=CC=C2C3=CC=CC=C13	112883-40-6
Cycle1	gttacctcgAG	cgaggtaacCA	C1=CC=C(C=C1)CC(C(=O)O)NC(=O)OCC2C3=CC=CC=C3C4=CC=CC=C24	86123-10-6
Cycle1	gtaaggcatAG	atgccttacCA	CCCCC(C(=O)O)NC(=O)OCC1C2=CC=CC=C2C3=CC=CC=C13	112883-41-7
Cycle1	atcgacctgAG	caggtcgatCA	CC(C)(C)OC(=O)CCC(C(=O)O)NC(=O)OCC1C2=CC=CC=C2C3=CC=CC=C13	104091-08-9
Cycle1	aggggattaAG	taatcccctCA	CC(C)C(C(=O)O)NC(=O)OCC1C2=CC=CC=C2C3=CC=CC=C13	84624-17-9
Cycle1	tgatctgctAG	agcagatcaCA	CC(C(C(=O)O)NC(=O)OCC1C2=CC=CC=C2C3=CC=CC=C13)OC(C)(C)C	138797-71-4
Cycle1	gcttaatcgAG	cgattaagcCA	CC(C)(C)OC1=CC=C(C=C1)CC(C(=O)O)NC(=O)OCC2C3=CC=CC=C3C4=CC=CC=C24	118488-18-9
Cycle1	tatggcgtcAG	gacgccataCA	C1CC(N(C1)C(=O)OCC2C3=CC=CC=C3C4=CC=CC=C24)C(=O)O	101555-62-8
Cycle1	cctacgcatAG	atgcgtaggCA	C1=CC=C(C=C1)CCC(C(=O)O)NC(=O)OCC2C3=CC=CC=C3C4=CC=CC=C24	135994-09-1
Cycle1	gttaaagggAG	ccctttaacCA	C1=CC=C2C(=C1)C(C3=CC=CC=C32)COC(=O)NCCC(=O)O	35737-10-1
Cycle1	cttgaccagAG	ctggtcaagCA	C1CCC(CC1)CC(C(=O)O)NC(=O)OCC2C3=CC=CC=C3C4=CC=CC=C24	135673-97-1
Cycle1	gggctgtaaAG	ttacagcccCA	O=C(O)C1=CN=C(CNC(OCC2C3=C(C=CC=C3)C4=C2C=CC=C4)=O)S1	2137636-91-8
Cycle1	ggtgaatgtAG	acattcaccCA	O=C(O)[C@@H]1[C@H](NC(OCC2C3=C(C=CC=C3)C4=C2C=CC=C4)=O)CCCC1(O=C(O)[C@H]1[C@H](NC(OCC2C3=C(C=CC=C3)C4=C2C=CC=C4)=O)CCCC1)	381241-08-3/430460-38-1 MIX
Cycle1	actccctctAG	agagggagtCA	NULL	NULL
Cycle2	ATGGTCGGTGT	ACCGACCATCT	C1=CC(=C(C=C1O)O)C=O	95-01-2
Cycle2	GACGCATCAGT	TGATGCGTCCT	CC=O	75-07-0
Cycle2	CCGAGTTGAGT	TCAACTCGGCT	C1CCN(CC1)C2=CC=CC=C2C=O	34595-26-1
Cycle2	GCTTCTGAGGT	CTCAGAAGCCT	C1=CC(=CC(=C1)F)COC2=CC=C(C=C2)C=O	66742-57-2
Cycle2	GGTGACTGAGT	TCAGTCACCCT	C(=O)NNC=O	628-36-4
Cycle2	ACCTATGCGGT	CGCATAGGTCT	CN(C)C1=CC(=C(C=C1)C=O)Cl	1424-66-4
Cycle2	TCTCCGATGGT	CATCGGAGACT	C1=CC=C2C(=C1)C(=CS2)C=O	5381-20-4
Cycle2	TCCGCACATGT	ATGTGCGGACT	C1=CC=C(C(=C1)C=O)SC2=CC=C(C=C2)Cl	107572-07-6
Cycle2	AGACGACAGGT	CTGTCGTCTCT	C1=CC(=CC2=C1C=CN2)C=O	1196-70-9
Cycle2	CCGACTACTGT	AGTAGTCGGCT	C1=CC(=C(C=C1F)[N+](=O)[O-])C=O	2923-96-8
Cycle2	GTGGACAAGGT	CTTGTCCACCT	C1=CC(=CC=C1C2=CC=C(O2)C=O)[N+](=O)[O-]	7147-77-5
Cycle2	CTCTGCTCAGT	TGAGCAGAGCT	C1=CC(=C(N=C1)C=O)F	31224-43-8
Cycle2	CATAGGTCCGT	GGACCTATGCT	CC1=C(SC=N1)C=O	82294-70-0
Cycle2	CAGCTCTGTGT	ACAGAGCTGCT	CC1=CC(=C(N1)C=O)C	2199-58-8
Cycle2	GGTAACGGAGT	TCCGTTACCCT	C1=CC(=CC=C1C(=O)C=O)F.O	447-43-8
Cycle2	GGAGAGACTGT	AGTCTCTCCCT	C1=COC(=C1)C=CC=O	623-30-3
Cycle2	GATGCTCTGGT	CAGAGCATCCT	C1COCCN1C2=CC=CC=C2C=O	58028-76-5
Cycle2	CGTCACAACGT	GTTGTGACGCT	C1OC2=C(O1)C=C(C=C2)C(=O)C=O.O	1173247-27-2
Cycle2	CCAAAGTCCGT	GGACTTTGGCT	CN1CCN(CC1)C2=CC=C(C=C2)C=O	27913-99-1
Cycle2	GGGTTGACTGT	AGTCAACCCCT	C1=CC=C(C(=C1)C=O)C2=CC=CC=C2C(=O)O	6720-26-9
Cycle2	GATCCGTTCGT	GAACGGATCCT	CC(C(=O)O)OC1=CC=CC=C1C=O	29040-34-4
Cycle2	CGATTCTCGGT	CGAGAATCGCT	COC1=CC=CC2=C1OCC(=C2)C=O	57543-38-1
Cycle2	AAGCCCGATGT	ATCGGGCTTCT	C1C(=CC2=C(O1)C=CC(=C2)Cl)C=O	57544-34-0
Cycle2	GAGAAGGGTGT	ACCCTTCTCCT	CC1=C(C2=CC=CC=C2N1CC(=O)N)C=O	61922-00-7
Cycle2	TGCAGAGCTGT	AGCTCTGCACT	C1=CC=C2C(=C1)C(=CN2CCC(=O)N)C=O	61922-01-8
Cycle2	GCTATGCTCGT	GAGCATAGCCT	C1=CC=C2C(=C1)C3=C(O2)C(=CC=C3)C=O	96706-46-6
Cycle2	TTCAGGGCAGT	TGCCCTGAACT	C1=CC=C(C=C1)N2C=C(C(=N2)C3=CC=NC=C3)C=O	371917-81-6
Cycle2	CGCAACGTAGT	TACGTTGCGCT	COC1=C(C=C(C=C1)C=O)CN2C=CC=N2	436086-89-4
Cycle2	CGAGTACGTGT	ACGTACTCGCT	CC1=C(NC2=C1C=C(C=C2)F)C=O	842972-09-2
Cycle2	AGAGCTCAGGT	CTGAGCTCTCT	CCOC1=CC(=CC(=C1OC)CC=C)C=O	872183-40-9
Cycle2	AGGAGTGCTGT	AGCACTCCTCT	C1=C(SC=C1C#CCO)C=O	887405-37-0
Cycle2	TCGCGGAAAGT	TTTCCGCGACT	CC(C)(C#CC1=CC=C(S1)C=O)O	915921-21-0
Cycle2	CTAGGACCTGT	AGGTCCTAGCT	CC1=CC=CC(=C1)C2=NC=C(C=N2)C=O	915921-67-4
Cycle2	CGTAACGGAGT	TCCGTTACGCT	C1CCOC(C1)C2=CC=C(O2)C=O	915924-73-1
Cycle2	GGTTCACGAGT	TCGTGAACCCT	C1=CC(=CC(=C1)F)N2C=C(C=N2)C=O	936940-82-8
Cycle2	GCTACGTGTGT	ACACGTAGCCT	CN1C=NN=C1SC2=CC=C(O2)C=O	938459-16-6
Cycle2	CTTGTGGGAGT	TCCCACAAGCT	CC(C)OC1=C(C=C(C=C1)C=O)CO	959237-03-7
Cycle2	CTTGACCGTGT	ACGGTCAAGCT	COC1=CC=CC=C1N2C=C(C=N2)C=O	1013835-99-8
Cycle2	TTCCCCTGAGT	TCAGGGGAACT	COC1=CC(=C(C=C1)N2C=CC=N2)C=O	1015845-56-3
Cycle2	GTTAGCTGCGT	GCAGCTAACCT	CC1=CC(=C(C(=C1)N2C=CC=N2)C=O)C	1015845-86-9
Cycle2	TACGGCCTTGT	AAGGCCGTACT	CC1=C(C=CC(=C1)N2C=CC=N2)C=O	1015845-89-2
Cycle2	TTTGCGGGAGT	TCCCGCAAACT	CC1=NC(=NC=C1C=O)C2=CC=CC=C2	342405-36-1
Cycle2	CCTTAAGGCGT	GCCTTAAGGCT	CCCCC1=NC=C(N1)C=O	68282-49-5
Cycle2	CTCGGGATAGT	TATCCCGAGCT	C1CN(CCC1C(=O)O)C2=CC=C(C=C2)C=O	727396-60-3
Cycle2	GTCTGTGGTGT	ACCACAGACCT	C1=C(C=C(C(=C1Cl)O)C=O)Cl	90-60-8
Cycle2	GTTATCCGGGT	CCGGATAACCT	C1=CNC2=NC=C(C(=C21)Cl)C=O	958230-19-8
Cycle2	CGCCTACATGT	ATGTAGGCGCT	C1CCN(CC1)C2=CC=C(C=C2)C=O	10338-57-5
Cycle2	GACAGATCGGT	CGATCTGTCCT	C1=CC2=C(C=C1C#N)C(=CN2)C=O	17380-18-6
Cycle2	CTCTCACTCGT	GAGTGAGAGCT	C1=CSC(=C1)C2=C(C=NN2)C=O	26033-27-2
Cycle2	CGAACTAGGGT	CCTAGTTCGCT	C1C2=C(C(=CC(=C2)F)C=O)OCO1	306934-87-2
Cycle2	CAGCGTCTTGT	AAGACGCTGCT	C1=CC(=C(C=C1[N+](=O)[O-])C=O)OCC(=O)O	6965-69-1
Cycle2	ACGAGGTGAGT	TCACCTCGTCT	C1=CC=C(C=C1)C2=NN(C=C2C=O)C3=CC=CC=C3	21487-45-6
Cycle2	GGGTTACAGGT	CTGTAACCCCT	CC1=C(C(=O)N(N1C)C2=CC=CC=C2)C=O	950-81-2
Cycle2	CTTCTGGGTGT	ACCCAGAAGCT	C1=CC=C(C(=C1)C=O)C2=CN=CN=C2	640769-71-7
Cycle2	GACGGTAGTGT	ACTACCGTCCT	C1=CC=C(C=C1)COC2=C(C=C(C=C2)C=O)Cl	66422-84-2
Cycle2	ATCGCCCATGT	ATGGGCGATCT	CC1=NN(C2=NC(=C(C=C12)C=O)Cl)C	898911-34-7
Cycle2	AGGGATCTCGT	GAGATCCCTCT	CC1=CC2=C(C=C1)OC=C(C2=O)C=O	42059-81-4
Cycle2	GCCACAAGTGT	ACTTGTGGCCT	C1=CC=C(C=C1)C2=NC(=CS2)C=O	20949-81-9
Cycle2	GTAGACGCTGT	AGCGTCTACCT	C1=CN=CC2=CN=CC(=C21)C=O	10273-40-2
Cycle2	AGCCGGTTAGT	TAACCGGCTCT	C1=CC(=CC=C1C=O)N2C=NC=N2	27996-86-7
Cycle2	GATGTGGTCGT	GACCACATCCT	COC1=CC2=C(C=C1)OCC(=C2)C=O	57543-40-5
Cycle2	TGCTACTGGGT	CCAGTAGCACT	CC1(OCC(O1)C=O)C	22323-80-4
Cycle2	ACGTTGCTGGT	CAGCAACGTCT	C1=CC(=NC(=C1C=O)Cl)Cl	55304-73-9
Cycle2	AGGCAACCAGT	TGGTTGCCTCT	C1=CC=C(C(=C1)C=O)SC2=CC=C(C=C2)Cl	107572-07-6
Cycle2	CATGTGCTGGT	CAGCACATGCT	C1=CC=C2C(=C1)C=C(N2)C=O	19005-93-7
Cycle2	TACCGACCTGT	AGGTCGGTACT	C1=CC(=CC(=C1)N2C=CC=N2)C=O	852227-92-0
Cycle2	GTCGCTCTTGT	AAGAGCGACCT	C1=CC=NC(=C1)C2=CC=C(S2)C=O	132706-12-8
Cycle2	TGAGGGCTTGT	AAGCCCTCACT	C1=CC(=C(N=C1)OC2=CC=C(C=C2)C#N)C=O	866049-85-6
Cycle2	CACTCACTCGT	GAGTGAGTGCT	C1=CC(=C(C=C1Cl)C2=CC=C(O2)C=O)Cl	99113-89-0
Cycle2	AGCCGCATAGT	TATGCGGCTCT	C1=CC(=CC=C1C=O)C2=CC=C(C=C2)F	60992-98-5
Cycle2	AGCGTCAGAGT	TCTGACGCTCT	C1C(=C(C2=C(O1)C=CC(=C2)F)Cl)C=O	105799-69-7
Cycle2	TTGACCCACGT	GTGGGTCAACT	C1COCCC1OC2=NC=C(C=C2)C=O	910036-95-2
Cycle2	GTGCTCGTAGT	TACGAGCACCT	C(=O)C(F)(F)F.O	33953-86-5
Cycle2	GTCATACCCGT	GGGTATGACCT	C1CCN(CC1)C2=CC=C(S2)C=O	24372-48-3
Cycle2	ACGGCGTTAGT	TAACGCCGTCT	C1=CC=C(C(=C1)N2C=CC=C2C=O)F	132407-65-9
Cycle2	AGCTATGCGGT	CGCATAGCTCT	C1CCOC(C1)N2C(=CC=N2)C=O	957483-88-4
Cycle2	AAGGGGTACGT	GTACCCCTTCT	CCC1=C(NC(=C1C)C=O)C	6250-80-2
Cycle2	TGATGCCGAGT	TCGGCATCACT	CCCN1C(=CC(=C1C)C=O)C	18870-75-2
Cycle2	GGAGTAACCGT	GGTTACTCCCT	CC1=NN(C=C1C=O)C2=CC=CC=C2	21487-48-9
Cycle2	GTGAAGTGGGT	CCACTTCACCT	C1=CC=C2C(=C1)C(=CN2CCC(=O)O)C=O	59213-02-4
Cycle2	GCGTCAAACGT	GTTTGACGCCT	C1C(N(CC2=CC=CC=C21)C=O)C(=O)O	61047-23-2
Cycle2	GCACAACTGGT	CAGTTGTGCCT	COC1=CC2=C(CCC2)C=C1C=O	73615-83-5
Cycle2	TTGGGACCTGT	AGGTCCCAACT	C1=CC(=CC(=C1)CN2C=CC=N2)C=O	78425-11-3
Cycle2	AGTCCTCTGGT	CAGAGGACTCT	C1=CC(=CC(=C1)C=O)C2=CC=CO2	85553-52-2
Cycle2	TGCTACCCAGT	TGGGTAGCACT	CC1=CC(=CC=C1)N2C=CC=C2C=O	86454-35-5
Cycle2	ACAGAGGTCGT	GACCTCTGTCT	C(=O)C1=C(NC(=O)NC1=O)N	87166-64-1
Cycle2	CACGGAATGGT	CATTCCGTGCT	C1=CC(=C(C(=C1)Cl)Cl)C2=CC=C(O2)C=O	106827-26-3
Cycle2	CCCAAATGGGT	CCATTTGGGCT	CN(C)C1=NC(=C(S1)C=O)Cl	129865-54-9
Cycle2	TACAGCACGGT	CGTGCTGTACT	C1=C(SC(=C1)C#CCO)C=O	133665-84-6
Cycle2	TTGAGAGCGGT	CGCTCTCAACT	C1=CC=C2C(=C1)C(=CN2CC(=O)N)C=O	312973-43-6
Cycle2	GTGCTCATGGT	CATGAGCACCT	C1OC2=CC3=CC(=C(N=C3C=C2O1)Cl)C=O	332382-81-7
Cycle2	CCACTATCCGT	GGATAGTGGCT	CC1=CC(=C(N1C2=CC3=CC=CC=C3C=C2)C)C=O	347332-17-6
Cycle2	AACGGTGTGGT	CACACCGTTCT	CC1=C(C2=CC=CC=C2N1CC(=O)O)C=O	432001-45-1
Cycle2	TCGTAGCCAGT	TGGCTACGACT	CC1=CC(=C(N1N2C=NN=C2)C)C=O	453557-49-8
Cycle2	CAGACTCGTGT	ACGAGTCTGCT	CC(C)OC(=O)CN1C=C(C2=CC=CC=C21)C=O	708991-26-8
Cycle2	CGCTCAGAAGT	TTCTGAGCGCT	CC1=CC(=C(C=C1)C)C2=C(C=NN2)C=O	720696-71-9
Cycle2	AAGTGCGCTGT	AGCGCACTTCT	CC1=CC=CC2=C1NC(=C2C=O)C	872505-78-7
Cycle2	TCGCTGTAGGT	CTACAGCGACT	CC1=C(C(=NN1C2=CC=C(C=C2)F)C)C=O	890626-54-7
Cycle2	AGCTCTCCTGT	AGGAGAGCTCT	C1CCN(CC1)CC2=CSC(=C2)C=O	893745-85-2
Cycle2	CACAGAGCTGT	AGCTCTGTGCT	C1=CC=C(C=C1)CNC2=NC=C(C=N2)C=O	946778-44-5
Cycle2	TTTGTGCCCGT	GGGCACAAACT	C1CC(OC1)CNC2=NC=C(C=N2)C=O	959239-06-6
Cycle2	TGCTAGCCTGT	AGGCTAGCACT	C1=COC(=C1)C2=NC=C(C=N2)C=O	959240-19-8
Cycle2	GGTGAAGCAGT	TGCTTCACCCT	C1=C(OC(=C1)C2=CC=NN2)C=O	1015939-90-8
Cycle2	TGTGAGACCGT	GGTCTCACACT	CC1=C(C(=NN1CC=C)C)C=O	1155595-91-7
Cycle2	CAGTCTTGGGT	CCAAGACTGCT	c1cc(ccc1c2nc(on2)C=O)Cl.O.O	1609403-15-7
Cycle2	GCGTTGTCAGT	TGACAACGCCT	C1=CC2=CC=NN2C(=C1)C=O	362661-83-4
Cycle2	GACCACAGTGT	ACTGTGGTCCT	CCCC1=NN=C(O1)C2=CC=C(C=C2)C=O	1061671-93-9
Cycle2	CCAAACCGAGT	TCGGTTTGGCT	C1=CC=C2C(=C1)C3=C(S2)C(=CC=C3)C=O	23985-81-1
Cycle2	CTTGAGCACGT	GTGCTCAAGCT	CCOC(=O)COC1=CC=C(C=C1)C=O	51264-69-8
Cycle2	GCGGAACAAGT	TTGTTCCGCCT	NULL	NULL
